# Supplementary material
Source: publisher figshare collection journal article supplement (https://gsapubs.figshare.com/ndownloader/files/22399260)
Supplement: Supplementary file 1 [file 22399260]

Archive with 2 entries (2 files):
- TableRefs.pdf
- 902_Supp1.xls
