# Supplementary material
Source: publisher figshare collection journal article supplement (https://gsapubs.figshare.com/ndownloader/files/22399260)
Supplement: Supplementary file 1 [file 22399260 › 902_Supp1.xls]

## Sheet: Sup Doc Tab 2 Samples
Supplemental File 1. Data for samples from the Indian Peak-Caliente field
Sample number	Stratigraphic unit	Sub-unit	Sub-unit 2	Rock type	Quadrangle	North Latitude	West Longitude	Reference	Geologic Map	Chemical analysis	Modal analysis	Paleomagnetic data	40Ar/39Ar	Notes
FAIRV-3-160-1	Bailey Spring, rhyolite lava flow of		lava	rhyolite	Fairview Pk, NV	38.1781	114.731	Best et al. (1998)	Nevada Bur Mines & Geol. Map 114	1	1			See unit description in NBMG Map 114, which includes chem anal
LAM-9-18-1	Blawn Fm.?	dike		rhyolite	Lamerdorf Peak, UT	38.3072	113.551	Abbott et al. (1983)	US Geol. Surv. Map I-1479
LAM-1-894-1	Blawn Fm.	dike		andesite	Frisco, UT	38.3897	113.475	Abbott et al. (1983)	US Geol. Surv. Map I-1479					Chemical analysis and age in Best et al. (2009)
LAM-1-894-2	Blawn Fm.	dike		andesite	Frisco, UT	38.3797	113.459	Abbott et al. (1983)	US Geol. Surv. Map I-1479					Chemical analysis and age in Best et al. (2009)
LAM-9-18-3	Blawn Fm.	dike		rhyolite	Lamerdorf Peak, UT	38.3111	113.595	Abbott et al. (1983)	US Geol. Surv. Map I-1479
TET-9-10-1	Blawn Fm.	dike		rhyolite	The Tetons, UT	38.1272	113.56	Best et al. (1987c)	US Geol. Surv. Map I-1794
TET-9-40-1	Blawn Fm.	dike		rhyolite	The Tetons, UT	38.1564	113.565	Best et al. (1987c)	US Geol. Surv. Map I-1794
LAM-9-74-9	Blawn Fm.	dike?		rhyolite	Lamerdorf Peak, UT	38.2656	113.517	Abbott et al. (1983)	US Geol. Surv. Map I-1479; Prof. Pap. 1433					small intrusive plug
ATL-1-12-1	Blawn Fm.	mafic lava flow mbr.		mafic	Atlanta, NV	38.4489	114.291	Willis et al. (1987)	US Geol. Surv. Map MF-1971
BAN-8-127-1	Blawn Fm.	mafic lava flow mbr.		mafic	Bannion Spring, UT	37.9811	113.848	Best (1987)	US Geol. Surv. Map I-1774	1
BAN-8-127-2	Blawn Fm.	mafic lava flow mbr.		mafic	Bannion Spring, UT	37.9736	113.841	Best (1987)	US Geol. Surv. Map I-1774	1
BAN-8-165-2	Blawn Fm.	mafic lava flow mbr.		trachyandesite	Bannion Spring, UT	37.9828	113.794	Best (1987)	US Geol. Surv. Map I-1774; Prof. Pap. 1433	1
BBS-5-32-1B	Blawn Fm.	mafic lava flow mbr.		mafic	Bible Spring, UT	38.6311	113.676	Best et al. (1987c)	US Geol. Surv. Map I-1794	1				glassy; hrnbl pheno; Chemical analysis and age in Best et al. (2009)
BBS-7-88-1	Blawn Fm.	mafic lava flow mbr.		mafic	Bible Spring, UT	38.0103	113.75	Best et al. (1987c)	US Geol. Surv. Map I-1794
BBS-7-88-2	Blawn Fm.	mafic lava flow mbr.		mafic	Bible Spring, UT	38.0064	113.741	Best et al. (1987c)	US Geol. Surv. Map I-1794	1				Chemical analysis and age in Best et al. (2009)
BBS-7-88-3	Blawn Fm.	mafic lava flow mbr.		mafic	Bible Spring, UT	38.0036	113.73	Best et al. (1987c)	US Geol. Surv. Map I-1794	1
FAIRV-3-188-1	Blawn Fm.	mafic lava flow mbr.		mafic	Fairview Pk, NV	38.2042	114.687	Best et al. (1998)	Nevada Bur Mines & Geol. Map 114	1				See unit description in NBMG Map 114, which includes chem anal; sample from top of Fairview Peak
FAIRV-3-201-2	Blawn Fm.	mafic lava flow mbr.		mafic	Fairview Pk, NV	38.1742	114.67	Best et al. (1998)	Nevada Bur Mines & Geol. Map 114
FAIRVW-1	Blawn Fm.	mafic lava flow mbr.		mafic	Fairview Pk, NV	38.195	114.71	Best et al. (1998)	Nevada Bur Mines & Geol. Map 114	1				Chemical analysis and age in Best et al. (2009)
FRSC-2-43-5	Blawn Fm.	mafic lava flow mbr.		andesite	Frisco, UT	38.45	113.256	Best et al. (1989a)	US Geol. Surv. Map I-1904	1				Chemical analysis and age in Best et al. (2009)
FRSC-2-45-3	Blawn Fm.	mafic lava flow mbr.		andesite	Frisco, UT	38.38	113.267	Best et al. (1989a)	US Geol. Surv. Map I-1904	1				Chemical analysis and age in Best et al. (2009)
FRSC-2-62-2	Blawn Fm.	mafic lava flow mbr.		andesite	Frisco, UT	38.3953	113.316	Best et al. (1989a)	US Geol. Surv. Map I-1904	1				Chemical analysis and age in Best et al. (2009)
FRSC-2-62-3	Blawn Fm.	mafic lava flow mbr.		andesite	Frisco, UT	38.3875	113.326	Best et al. (1989a)	US Geol. Surv. Map I-1904	1				Chemical analysis and age in Best et al. (2009)
FRSC-2-7-1	Blawn Fm.	mafic lava flow mbr.		andesite	Frisco, UT	38.3678	113.343	Best et al. (1989a)	US Geol. Surv. Map I-1904	1				Chemical analysis and age in Best et al. (2009)
FRSC-3-34-1	Blawn Fm.	mafic lava flow mbr.		mafic	Frisco, UT	38.2786	113.259	Best et al. (1989a)	US Geol. Surv. Map I-1904
FRSC-3-34-2	Blawn Fm.	mafic lava flow mbr.		mafic	Frisco, UT	38.2775	113.265	Best et al. (1989a)	US Geol. Surv. Map I-1904
FRSC-3-34-3	Blawn Fm.	mafic lava flow mbr.		basaltic andesite	Frisco, UT	38.2844	113.267	Best et al. (1989a)	US Geol. Surv. Map I-1904	1				Chemical analysis and age in Best et al. (2009)
FRSC-3-40-3	Blawn Fm.	mafic lava flow mbr.		andesite	Frisco, UT	38.4486	113.264	Best et al. (1989a)	US Geol. Surv. Map I-1904	1				Chemical analysis and age in Best et al. (2009)
FRSC-WAH66	Blawn Fm.	mafic lava flow mbr.		trachyandesite	Frisco, UT	38.3736	113.499		US Geol. Surv. Map I-1904; Prof. Pap. 1433					23.2 +/- 1.0 Ma K-Ar whole rock (Best et al., 1987)
LAM-4C	Blawn Fm.	mafic lava flow mbr.		mafic	Lamerdorf Peak, UT	38.3628	113.5	Abbott et al. (1983)	US Geol. Surv. Map I-1479	1				samples of crystalline (-1C) and glassy (-1G)
LAM-4G	Blawn Fm.	mafic lava flow mbr.		mafic	Lamerdorf Peak, UT	38.3628	113.5	Abbott et al. (1983)	US Geol. Surv. Map I-1479	1				samples of crystalline (-1C) and glassy (-1G)
LAM-9-104-5	Blawn Fm.	mafic lava flow mbr.		andesite	Frisco, UT	38.3164	113.475	Abbott et al. (1983)	US Geol. Surv. Map I-1479	1				Chemical analysis and age in Best et al. (2009) where longitude is 113.9747
LAM-9-69-1	Blawn Fm.	mafic lava flow mbr.		andesite	Frisco, UT	38.3756	113.498	Abbott et al. (1983)	US Geol. Surv. Map I-1479	1				Chemical analysis and age in Best et al. (2009)
LAM-9-74-6	Blawn Fm.	mafic lava flow mbr.		basaltic andesite	The Tetons, UT	38.2475	113.506	Abbott et al. (1983)	US Geol. Surv. Map I-1479	1				Chemical analysis and age in Best et al. (2009)
MAPLE-1C	Blawn Fm.?	mafic lava flow mbr.		andesite	Maple Ridge, UT	37.431	113.808			1				Chemical analysis and age in Best et al. (2009)
MAPLE-1G	Blawn Fm.?	mafic lava flow mbr.		andesite	Maple Ridge, UT	37.431	113.808			1				Chemical analysis and age in Best et al. (2009)
MIL-3-11-1	Blawn Fm.	mafic lava flow mbr.		andesite	Milford, UT	38.2839	113.179	Best et al. (1989a)	US Geol. Surv. Map I-1904	1				Chemical analysis and age in Best et al. (2009)
MIL-3-11-4	Blawn Fm.	mafic lava flow mbr.		dacite	Milford, UT	38.3033	113.192	Best et al. (1989a)	US Geol. Surv. Map I-1904	1				Chemical analysis and age in Best et al. (2009)
MIL-3-35-1	Blawn Fm.	mafic lava flow mbr.		basaltic andesite	Milford, UT	38.3161	113.224	Best et al. (1989a)	US Geol. Surv. Map I-1904	1				Chemical analysis and age in Best et al. (2009)
MLLR-9-164-2	Blawn Fm.	lava flow mbr.	post-Bauers	andesite	Miller Canyon, NV	38.2517	114.218	Best et al. (1989b)	US Geol. Surv. Map I-1881	1				lava dome with strongly zoned brown hrnbl pheno on N margin of White Rock caldera; could be Lund or Isom age; Chemical analysis and age in Best et al. (2009)
STM-8-167-1	Blawn Fm.	mafic lava flow mbr.		mafic	Steamboat Mtn.., UT	38.0011	113.799	Best et al. (1987a)	US Geol. Surv. Map I-1795
TET-8-224-1	Blawn Fm.	mafic lava flow mbr.		mafic	The Tetons, UT	38.1619	113.616	Best et al. (1987c)	US Geol. Surv. Map I-1794
TET-8-226-1	Blawn Fm.	mafic lava flow mbr.		mafic	Obervational Knoll, UT	38.1383	113.636	Best et al. (1987c)	US Geol. Surv. Map I-1794
TRC-1-6-1	Blawn Fm.	mafic lava flow mbr.		andesite	Trail Canyon, NV	38.2972	114.293	Willis et al. (1987)	US Geol. Surv. Map MF-1971	1				Chemical analysis and age in Best et al. (2009)
TRC-1-6-2	Blawn Fm.	mafic lava flow mbr.		andesite	Trail Canyon, NV	38.3036	114.291	Willis et al. (1987)	US Geol. Surv. Map MF-1971	1				Chemical analysis and age in Best et al. (2009)
FRSC-2-62-1	Blawn Fm.	rhyolite lava flow mbr.		rhyolite	Frisco, UT	38.3881	113.328	Best et al. (1989a)	US Geol. Surv. Map I-1904
LAM-1-38-2	Blawn Fm.	rhyolite lava flow mbr.		rhyolite	Lamerdorf Peak, UT			Abbott et al. (1983)	US Geol. Surv. Map I-1479	1
LAM-9-103-2	Blawn Fm.	rhyolite lava flow mbr.		rhyolite	Frisco, UT	38.2661	113.457	Abbott et al. (1983)	US Geol. Surv. Map I-1479	1
LAM-9-103-4	Blawn Fm.	rhyolite lava flow mbr.		rhyolite	Frisco, UT	38.2556	113.453	Abbott et al. (1983)	US Geol. Surv. Map I-1479					sample approximately located
LAM-9-104-1	Blawn Fm.	rhyolite lava flow mbr.		rhyolite	Frisco, UT	38.2833	113.481	Abbott et al. (1983)	US Geol. Surv. Map I-1479
LAM-9-104-3	Blawn Fm.	rhyolite lava flow mbr.		rhyolite	Frisco, UT	38.3	113.47	Abbott et al. (1983)	US Geol. Surv. Map I-1479
LAM-9-104-4	Blawn Fm.	rhyolite lava flow mbr.		rhyolite	Frisco, UT	38.3139	118.473	Abbott et al. (1983)	US Geol. Surv. Map I-1479
LAM-9-74-10	Blawn Fm.	rhyolite lava flow mbr.		rhyolite	Lamerdorf Peak, UT	38.2653	113.514	Abbott et al. (1983)	US Geol. Surv. Map I-1479
LAM-9-74-7	Blawn Fm.	rhyolite lava flow mbr.		rhyolite	Frisco, UT	38.2556	113.499	Abbott et al. (1983)	US Geol. Surv. Map I-1479
MOD-1-108-2	Blawn Fm.	rhyolite lava flow mbr.		rhyolite	Modena, UT	0	0	Best (1987)	US Geol. Surv. Map I-1774
MOD-1-355-1	Blawn Fm.	rhyolite lava flow mbr.		rhyolite	Eightmile Spring, UT	37.9567	113.956	Best (1987)	US Geol. Surv. Map I-1774
MOD-1-355-2	Blawn Fm.	rhyolite lava flow mbr.		rhyolite	Eightmile Spring, UT	37.9517	113.949	Best (1987)	US Geol. Surv. Map I-1774
MOD-9-108-1	Blawn Fm.	rhyolite lava flow mbr.		rhyolite	Modena, UT	0	0	Best (1987)	US Geol. Surv. Map I-1774
PANACASM-2-101-1	Blawn Fm.	rhyolite lava flow mbr.		rhyolite	Panaca Summit, NV	37.8447	114.146	Williams et al. (1997)	US Geol. Surv. Map I-2479
PIERSON-7	Blawn Fm.	rhyolite lava flow mbr.		rhyolite	Pierson Summit, NV	38.1058	114.335			1	1		1S	22.59 +/- 0.08 Ma relative to 28.201 Ma for Fish Canyon sanidine; dated in the New Mexico Geochronological Lab, 2011
STM-20	Blawn Fm.	rhyolite lava flow mbr.		rhyolite	Steamboat Mtn.., UT	0	0	Best et al. (1987a)	US Geol. Surv. Map I-1795
TET-9-13-1	Blawn Fm.	rhyolite lava flow mbr.		rhyolite	The Tetons, UT	38.2108	113.589	Best et al. (1987c)	US Geol. Surv. Map I-1794
TET-9-43-2	Blawn Fm.	rhyolite lava flow mbr.		rhyolite	The Tetons, UT	38.2147	113.564	Best et al. (1987c)	US Geol. Surv. Map I-1794; Prof. Pap. 1433	1				18.3 +/- 0.7 Ma K-Ar on sanidine (Best et al. 1987(topaz bearing
TET-9-77-1	Blawn Fm.	rhyolite lava flow mbr.		rhyolite	The Tetons, UT	38.1931	113.501	Best et al. (1987c)	US Geol. Surv. Map I-1794
TET-9-772	Blawn Fm.	rhyolite lava flow mbr.		rhyolite	The Tetons, UT	38.1917	113.518	Best et al. (1987c)	US Geol. Surv. Map I-1794
TET-9-78-1	Blawn Fm.	rhyolite lava flow mbr.		rhyolite	The Tetons, UT	38.1703	113.502	Best et al. (1987c)	US Geol. Surv. Map I-1794
ALAMO-1DL	Condor Canyon Fm.	Bauers Tuff Mbr.		rhyolite	Alamo, NV	37.2528	115.222	Ekren et al. (1971)	US Geol. Surv. Map I-1041	1		1		samples of lower (-1DL) and upper (-1DU) part of unit
ALAMO-1DU	Condor Canyon Fm.	Bauers Tuff Mbr.		rhyolite	Alamo, NV	37.2528	115.222	Ekren et al. (1971)	US Geol. Surv. Map I-1041	1		1		samples of lower (-1DL) and upper (-1DU) part of unit
SHNG-1K	Condor Canyon Fm.	Bauers Tuff Mbr.		rhyolite	Shingle Pass, NV	38.545	114.93	Ekren et al. (1971)	US Geol. Surv. Map I-1041			1	1S
BUCK-1B	Condor Canyon Fm.	Bauers Tuff Mbr.		rhyolite	Buckhorn Spring, UT	38.2514	113.806	Best et al. (1987b)	US Geol. Surv. Map I-1796
BUCK-1C	Condor Canyon Fm.	Bauers Tuff Mbr.		rhyolite	Buckhorn Spring, UT	38.2514	113.806	Best et al. (1987b)	US Geol. Surv. Map I-1796
CEDARNW-1V	Condor Canyon Fm.	Bauers Tuff Mbr.		rhyolite	Cedar City NW, UT	37.7047	113.195	Mackin et al. (1976)	US Geol. Surv. Map GQ-125			2		vitrophyre
CEDARNW-1A	Condor Canyon Fm.	Bauers Tuff Mbr.		rhyolite	Cedar City NW, UT	37.7047	113.195	Mackin et al. (1976)	US Geol. Surv. Map GQ-125			2	1S	overlies CEDARNW-1V
CEDARNW-1HU	Condor Canyon Fm.	Bauers Tuff Mbr.		rhyolite	Cedar City NW, UT	37.7047	113.195	Mackin et al. (1976)	US Geol. Surv. Map GQ-125			2		upper part of unit
CHIEF-1HL	Condor Canyon Fm.	Bauers Tuff Mbr.		rhyolite	Bennett Pass, NV	37.7533	114.593	Rowley et al. (1994)	Unpub. Map of K. Burke & G. Axen		1			samples of lower (-1HL) and upper (-1HU) parts of unit
CHIEF-1HU	Condor Canyon Fm.	Bauers Tuff Mbr.		rhyolite	Bennett Pass, NV	37.7533	114.593	Rowley et al. (1994)	Unpub. Map of K. Burke & G. Axen		1			samples of lower (-1HL) and upper (-1HU) parts of unit
CND-1TL	Condor Canyon Fm.	Bauers Tuff Mbr.	lower	rhyolite	Condor Canyon, NV	37.8583	114.177	G.J. Axen	Unpub. Map of Gary Axen		1	1		same as CND-9
CND-1TU	Condor Canyon Fm.	Bauers Tuff Mbr.	upper	rhyolite	Condor Canyon, NV	37.8583	114.177	G.J. Axen	Unpub. Map of Gary Axen		1	1		within 6 m of top; same as CND-10
DES-1AM	Condor Canyon Fm.	Bauers Tuff Mbr.		rhyolite	Desert Mound, UT	37.6356	113.274			1				middle of cooling unit
DES-1AU	Condor Canyon Fm.	Bauers Tuff Mbr.		rhyolite	Desert Mound, UT	37.6356	113.274			1				upper crystal- and pumice-poor
DES-1AV	Condor Canyon Fm.	Bauers Tuff Mbr.		rhyolite	Desert Mound, UT	37.6356	113.274			1				vitrophyre
FRSC-3-40-2	Condor Canyon Fm.	Bauers Tuff Mbr.		rhyolite	Frisco, UT	38.4486	113.264	Best et al. (1989a)	US Geol. Surv. Map I-1904					thin; lies between Blawn mafic lavas. Same as FRSC -6B
FRSC-6B	Condor Canyon Fm.	Bauers Tuff Mbr.		rhyolite	Frisco, UT	38.4486	113.264	Best et al. (1989a)	US Geol. Surv. Map I-1904					same area as FRSC -3-40-3
FRSC-7	Condor Canyon Fm.	Bauers Tuff Mbr.		rhyolite	Frisco, UT	38.3489	113.472		US Geol. Surv. Map I-1904
HANCSUM-1H	Condor Canyon Fm.	Bauers Tuff Mbr.		rhyolite	Hancock Summit, NV	37.4403	115.376
HOR-1C	Condor Canyon Fm.	Bauers Tuff Mbr.		rhyolite	Horse Corral Pass, NV	38.3803	114.407	Willis et al. (1987)	US Geol. Surv. Map MF-1971
LUND-2	Condor Canyon Fm.	Bauers Tuff Mbr.		rhyolite	Lund, UT	38.1186	113.421	Hintze et al. (1994b)	US Geol. Surv. Map I-2361					sample A, upper, B, lower
MLLR-3	Condor Canyon Fm.	Bauers Tuff Mbr.		rhyolite	Miller Canyon, NV	38.3444	114.223	Best et al. (1989b)	US Geol. Surv. Map I-1881
MNSV-2	Condor Canyon Fm.	Bauers Tuff Mbr.		rhyolite	Minersville, UT	38.2167	112.879
MNSV-3	Condor Canyon Fm.	Bauers Tuff Mbr.		rhyolite	Minersville, UT	38.2167	112.879
MOD-1-10-1	Condor Canyon Fm.	Bauers Tuff Mbr.		rhyolite	Modena, UT	37.7867	113.951	Best (1987)	US Geol. Surv. Map I-1774
PAHRC-1P	Condor Canyon Fm.	Bauers Tuff Mbr.		rhyolite	Pahroc Spring, NV	37.625	114.998	Scott et al. (1992)	US Geol. Surv. Open-File Rpt-92-613			1
WATERNE-1J	Condor Canyon Fm.	Bauers Tuff Mbr.		rhyolite	Water Gap NE, NV	38.225	115.3
WHRN-1HL	Condor Canyon Fm.	Bauers Tuff Mbr.		rhyolite	White River Narrows, NV	37.85	115.019	du Bray and Hurtubise (1994)	US Geol. Surv. Maps I-2282 and I-1041		1	1		lower
WHRN-1HU	Condor Canyon Fm.	Bauers Tuff Mbr.		rhyolite	White River Narrows, NV	37.85	115.019	du Bray and Hurtubise (1994)	US Geol. Surv. Maps I-2282 and I-1041		1	1		upper
WHRN-1HV	Condor Canyon Fm.	Bauers Tuff Mbr.		rhyolite	White River Narrows, NV	37.85	115.019	du Bray and Hurtubise (1994)	US Geol. Surv. Maps I-2282 and I-1041					vitrophyre
CND-1Q	Condor Canyon Fm.	Swett Tuff Mbr.	lower	rhyolite	Condor Canyon, NV	37.8431	114.345	G.J. Axen	Unpub. Map of Gary Axen	1		1	2P	chem anal on upper part
CND-1R	Condor Canyon Fm.	Swett Tuff Mbr.	middle	rhyolite	Condor Canyon, NV	37.8581	114.328	G.J. Axen	Unpub. Map of Gary Axen	1
CND-1S	Condor Canyon Fm.	Swett Tuff Mbr.	upper	rhyolite	Condor Canyon, NV	37.8581	114.327	G.J. Axen	Unpub. Map of Gary Axen	1
FRSC-1-2-4	Condor Canyon Fm.	Swett or Bauers Tuff Mbr.		rhyolite	Frisco, UT	38.2786	113.286	Best et al. (1989a)	US Geol. Surv. Map I-1904
MIN-8-106-1	Condor Canyon Fm.	Swett Tuff Mbr.		rhyolite	Miners Cabin Wash, UT	38.3256	113.876	Best et al. (1987b)	US Geol. Surv. Map I-1796
PAHRC-1M	Condor Canyon Fm.	Swett Tuff Mbr.		rhyolite	Pahroc Spring, NV	37.6728	114.998	Scott et al. (1992)	US Geol. Surv. Open-File Rpt-92-613			1
PANACASM-3-239-5A	Condor Canyon Fm.	Swett Tuff Mbr. ?		rhyolite	Panaca Summit, NV	37.7997	113.228	Williams et al. (1997)	US Geol. Surv. Map I-2479					very clast rich, mineralogically not Swett but underlies Bauers
WHRN-1G	Condor Canyon Fm.	Swett Tuff Mbr.		rhyolite	White River Narrows, NV	37.85	115.019	du Bray and Hurtubise (1994)	US Geol. Surv. Maps I-2282 and I-1041			1
BRN-12	Cottonwood Wash Tuff			dacite	Warm Point, UT	38.8214	113.473	Hintze (1974a)	US Geol. Surv. Map MF-633					upper pink part of unit below impersistant conglomerate that underlies Wah Wah Springs tuff
BRN-13BV	Cottonwood Wash Tuff			dacite	Warm Point, UT	38.8222	113.472	Hintze (1974a)	US Geol. Surv. Map MF-633					host ignimbrite matrix around pumices (-13M)
BRN-13P	Cottonwood Wash Tuff			dacite	Warm Point, UT	38.8222	113.472	Hintze (1974a)	US Geol. Surv. Map MF-633					samples of pumice in same host tuff as BRN-1 pumices
BRN-13M	Cottonwood Wash Tuff			dacite	Warm Point, UT	38.8222	113.472	Hintze (1974a)	US Geol. Surv. Map MF-633	1				host ignimbrite matrix around pumices (-13M)
BRN-13BM	Cottonwood Wash Tuff			dacite	Warm Point, UT	38.8222	113.472	Hintze (1974a)	US Geol. Surv. Map MF-633					mafic crystal-rich bedded tuff below ignimbrite
BULLG-1	Cottonwood Wash Tuff			dacite	Bullgrass Knoll, UT	39.0831	113.591			1	1
DUTCHJ-1D	Cottonwood Wash Tuff			dacite	Dutch John Mtn., NV	38.4547	114.727	Ekren et al. (1971)	US Geol. Surv. Map I-1041			1		vitrophyre
ELYS-1C	Cottonwood Wash Tuff			dacite	Ely Springs, NV	37.9089	114.661	G.J. Axen	Unpub. Map of Gary Axen			2		sample 7T612 collected 2-3 m below contact with overlying Wah Wah Springs has its direction; sample 9P001 has Cottonwood Wash direction
FAIRV-32	Cottonwood Wash Tuff			dacite	Fairview Pk, NV	38.166	114.675	Best et al. (1998)	NBMG Map 114	1	1
FAIRV-33	Cottonwood Wash Tuff			dacite	Fairview Pk, NV	38.1661	114.675	Best et al. (1998)	NBMG Map 114					same as FAIRVIEW-5
FAIRV-34	Cottonwood Wash Tuff			dacite	Fairview Pk, NV	38.1652	114.673	Best et al. (1998)	NBMG Map 114					same as FAIRVIEW-6
GOUGE-1-129-8	Cottonwood Wash Tuff			dacite	The Gouge Eye, NV	38.5231	114.476	Loucks et al. (1989)	US Geol. Surv. Map I-1866					flow-layered (cataclastic?) inclusion in tuff
GOUGE-1-133-9	Cottonwood Wash Tuff		upper	dacite	The Gouge Eye, NV	38.6075	114.487	Loucks et al. (1989)	USGS Map I-1866		1
GOUGE-1-486-5	Cottonwood Wash Tuff			dacite	The Gouge Eye, NV	38.5825	114.438	Loucks et al. (1989)	US Geol. Surv. Map I-1866
GOUGE-1-488-1	Cottonwood Wash Tuff			dacite	The Gouge Eye, NV	0	0	Loucks et al. (1989)	US Geol. Surv. Map I-1866					vitrophyre
GOUGEWL-1-1	Cottonwood Wash Tuff			dacite	Gouge Eye Well, NV	38.5956	114.509	Loucks et al. (1989)	US Geol. Surv. Map I-1866	1	1
GOUGEWL-1-5C	Cottonwood Wash Tuff			dacite	Gouge Eye Well, NV	38.5956	114.509	Loucks et al. (1989)	US Geol. Surv. Map I-1866	1
GOUGEWL-1-5V	Cottonwood Wash Tuff			dacite	Gouge Eye Well, NV	38.5956	114.509	Loucks et al. (1989)	US Geol. Surv. Map I-1866	1	1
GOUGEWL-1-15	Cottonwood Wash Tuff			dacite	Gouge Eye Well, NV	38.5956	114.509	Loucks et al. (1989)	US Geol. Surv. Map I-1866	1	1
GOUGEWL-1-19	Cottonwood Wash Tuff			dacite	Gouge Eye Well, NV	38.5956	114.509	Loucks et al. (1989)	US Geol. Surv. Map I-1866	1	1
HAM-1D	Cottonwood Wash tuff			dacite	Hamblin Well, NV	38.4789	114.059	Best et al. (1989b)	USGS Map I-1881					samples -1D and -1V collected near base
HAM-1V	Cottonwood Wash tuff			dacite	Hamblin Well, NV	38.4789	114.059	Best et al. (1989b)	USGS Map I-1881	1	1			samples -1D and -1V collected near base
HAM-7	Cottonwood Wash Tuff			dacite	Hamblin Well, NV	38.4925	114.054	Best et al. (1989b)	USGS Map I-1881		1
HFW-20	Cottonwood Wash Tuff			dacite	Halfway Summit, UT	38.5382	113.838	Best and Hintze (1980)	USGS Map MF-1153
HFW-2VA	Cottonwood Wash Tuff			dacite	Halfway Summit, UT			Best and Hintze (1980)	US Geol. Surv. Map MF-1153	1
HFW-21D	Cottonwood Wash Tuff			dacite	Halfway Summit, UT	38.539	113.839	Best and Hintze (1980)	USGS Map MF-1153	1	1
HFW-21V	Cottonwood Wash Tuff			dacite	Halfway Summit, UT	38.539	113.839	Best and Hintze (1980)	USGS Map MF-1153	1	1
HFW-22V	Cottonwood Wash Tuff			dacite	Halfway Summit, UT	38.5389	113.839	Best and Hintze (1980)	USGS Map MF-1153	1	1
HFW-8-153-1	Cottonwood Wash Tuff			dacite	Halfway Summit, UT	38.5569	113.855	Best and Hintze (1980)	US Geol. Surv. Map MF-1153					sample 4 m above base of unit (-1A)
HFW-8-153-1-BV	Cottonwood Wash Tuff		basal part	dacite	Halfway Summit, UT	38.5569	113.855	Best and Hintze (1980)	USGS Map MF-1153	1				sample 5 m above base of unit
HFW-8-153-1-CD	Cottonwood Wash Tuff		basal part	dacite	Halfway Summit, UT	38.5569	113.855	Best and Hintze (1980)	USGS Map MF-1153	1				uppler part of unit
HFW-8-153-2	Cottonwood Wash Tuff		upper part	dacite	Halfway Summit, UT	38.5569	113.855	Best and Hintze (1980)	USGS Map MF-1153
HIGH-1	Cottonwood Wash Tuff			dacite	Highland Peak, NV	37.9394	114.502	Park et al. (1958)	US Geol. Surv. Map MF-1155
HOR-1-489-3	Cottonwood Wash Tuff			dacite	Horse Corral Pass, NV	38.4933	114.439	Willis et al. (1987)	US Geol. Surv. Map MF-1971					vitrophyre
INDSP-1-483-5	Cottonwood Wash Tuff			dacite	Indian Springs Knolls, NV	38.6556	114.447	Loucks et al. (1989)	US Geol. Surv. Map I-1866
KNOLL-1-2	Cottonwood Wash Tuff			dacite	Knoll Hill, UT	39.1369	113.799			1	1			2 m above base of unit
KNOLL-1-9	Cottonwood Wash Tuff			dacite	Knoll Hill, UT	39.1369	113.799			1	1			9 m above base of unit
KNOLL-1-20	Cottonwood Wash Tuff			dacite	Knoll Hill, UT	39.1369	113.799			1	1			20 m above base of unit
KNOLL-1-30B	Cottonwood Wash Tuff			dacite	Knoll Hill, UT	39.1369	113.799			1	1			30 m above base of unit
KNOLL-1-30C	Cottonwood Wash Tuff			dacite	Knoll Hill, UT	39.1369	113.799			1	1			30 m above base of unit
KNOLL-1-38-2	Cottonwood Wash Tuff			dacite	Knoll Hill, UT	39.1369	113.799				1			38 m above base of unit
KNOLL-1-40	Cottonwood Wash Tuff			dacite	Knoll Hill, UT	39.1369	113.799			1	1			40 m above base of unit
LAM-6	Cottonwood Wash Tuff			dacite	Lamerdorf Peak, UT	38.3378	118.562	Abbott et al. (1983)	US Geol. Surv. Map I-1479	1			1P	vitrophyre
MWASH-1-1	Cottonwood Wash tuff			dacite	Miller Wash, UT	38.5201	114.051	Hintze and Best (1987)	USGS Map MF-1950	1	1			I m above base of cooling unit
MWASH-1-4	Cottonwood Wash tuff			dacite	Miller Wash, UT	38.5201	114.051	Hintze and Best (1987)	USGS Map MF-1950		1			4 m above base of cooling unit
MWASH-1-10	Cottonwood Wash tuff			dacite	Miller Wash, UT	38.5201	114.051	Hintze and Best (1987)	USGS Map MF-1950	1	1			I0 m above base of cooling unit
MWASH-1-24	Cottonwood Wash tuff			dacite	Miller Wash, UT	38.5201	114.051	Hintze and Best (1987)	USGS Map MF-1950	1				24 m above base of cooling unit
MWASH-1-40	Cottonwood Wash tuff			dacite	Miller Wash, UT	38.5201	114.051	Hintze and Best (1987)	USGS Map MF-1950	1	1			40 m above base of cooling unit
MWASH-1-60	Cottonwood Wash tuff			dacite	Miller Wash, UT	38.5201	114.051	Hintze and Best (1987)	USGS Map MF-1950	1				60 m above base of cooling unit
MWASH-1-84	Cottonwood Wash tuff			dacite	Miller Wash, UT	38.5201	114.051	Hintze and Best (1987)	USGS Map MF-1950	1				84 m above base of cooling unit
MWASH-1-97	Cottonwood Wash tuff			dacite	Miller Wash, UT	38.5201	114.051	Hintze and Best (1987)	USGS Map MF-1950	1	1			97 m above base of cooling unit
PAHRC-2A	Cottonwood Wash Tuff			dacite	Pahroc Spring, NV	37.7078	114.93	Scott et al. (1992)	US Geol. Surv. Open-File Rpt-92-613			1	3P
SCOTTS-UW	Cottonwood Wash Tuff		fallout tuff	rhyolite	Scotts Bluff South, NE	41.839	103.697	Blaylock (1998)					1P	fallout tuff in Nebraska
SHNG-1E	Cottonwood Wash tuff			dacite	Shingle Pass, NV	38.55	114.933					1		samples -1ED and and -1EV
SHNG-2	Cottonwood Wash tuff			dacite	Shingle Pass, NV	38.543	114.934							basal vitrophyre
SHNG-4-6	Cottonwood Wash tuff			dacite	Shingle Pass, NV	38.543	114.934			1	1			6 meters above base of unit
SHNG-4-21	Cottonwood Wash tuff			dacite	Shingle Pass, NV	38.543	114.934			1				21 m above base of unit
SHNG-4-33.5	Cottonwood Wash tuff			dacite	Shingle Pass, NV	38.543	114.934			1	1			33.5 m above base of unit
SHNG-4-34	Cottonwood Wash tuff			dacite	Shingle Pass, NV	38.543	114.934			1				34 m above base of unit
SHNG-4-42	Cottonwood Wash tuff			dacite	Shingle Pass, NV	38.543	114.934			1	1			42 m above base of unit
SHNG-4-63	Cottonwood Wash tuff			dacite	Shingle Pass, NV	38.543	114.934			1				63 m above base of unit
SHNG-4-78	Cottonwood Wash tuff			dacite	Shingle Pass, NV	38.543	114.934			1				78 m above base of unit
SILVRWL-3-0	Cottonwood Wash tuff			dacite	Silver King Well, NV	38.314	114.968			1
SWP-4V-A	Cottonwood Wash Tuff			dacite	Sawtooth Peak, UT	38.402	113.868	Best et al. (1987b)	USGS Map I-1796	1
WARM-1	Cottonwood Wash Tuff			dacite	Warm Point, UT	38.8189	113.463	Hintze (1974a)	USGS Map MF-633	1
WARM-3-2	Cottonwood Wash Tuff			dacite	Warm Point, UT	38.8473	113.488	Hintze (1974a)	USGS Map MF-633	1	1			2 meters above base of unit
WARM-3-25	Cottonwood Wash Tuff			dacite	Warm Point, UT	38.8477	113.488	Hintze (1974a)	USGS Map MF-633	1	1			25 meters above base of unit
WARM-3-40	Cottonwood Wash Tuff			dacite	Warm Point, UT	38.848	113.487	Hintze (1974a)	USGS Map MF-633	1	1			40 meters above base of unit
WARM-3-58	Cottonwood Wash Tuff			dacite	Warm Point, UT	38.8483	113.486	Hintze (1974a)	USGS Map MF-633	1	1			58 meters above base of unit
WARM-3-70	Cottonwood Wash Tuff			dacite	Warm Point, UT	38.8487	113.486	Hintze (1974a)	USGS Map MF-633	1	1			70 meters above base of unit
WARM-3-87	Cottonwood Wash Tuff			dacite	Warm Point, UT	38.849	113.485	Hintze (1974a)	USGS Map MF-633	1	1			87 meters above base of unit
MIN-8-23-2	Cottonwood Wash Tuff ?			dacite	Miners Cabin Wash, UT	38.3617	113.95	Best et al. (1987b)	USGS Map I-1796					abundant quartz
MIN-8-23-3	Cottonwood Wash Tuff ?			dacite	Miners Cabin Wash, UT	38.3608	113.951	Best et al. (1987b)	USGS Map I-1796					WWS breccia unit (Twib) at topographic margin of Indian Peak caldera
MIN-8-24-1	Cottonwood Wash Tuff ?			dacite	Miners Cabin Wash, UT	38.3625	113.946	Best et al. (1987b)	USGS Map I-1796					Mackleprang tuff
MIN-8-24-2	Cottonwood Wash Tuff ?			dacite	Miners Cabin Wash, UT	38.3606	113.952	Best et al. (1987b)	USGS Map I-1796					WWS breccia unit (Twib) at topographic margin of Indian Peak caldera
MIN-8-24-3	Cottonwood Wash Tuff ?			dacite	Miners Cabin Wash, UT	38.3586	113.954	Best et al. (1987b)	USGS Map I-1796					flow-layered? in hand sample--sandstone beneath Twib breccia
MIN-8-24-5	Cottonwood Wash Tuff ?			dacite	Miners Cabin Wash, UT	38.3519	113.951	Best et al. (1987b)	USGS Map I-1796					small biotites--sandstone beneath Twib breccia
STM-8-132-1	Cottonwood Wash Tuff ?			dacite	Steamboat Mtn.., UT	38.0936	113.837	Best et al. (1987a)	US Geol. Surv. Map I-1795					clast in Mackleprang tuff
ATL-5	Cottonwood Wash Tuff		pumice clasts	dacite	Atlanta, NV	38.5014	114.356	Willis et al. (1987)	USGS Map MF-1971					30-40% large pumice clasts
BRN-2P	Cottonwood Wash Tuff		pumice clast	dacite	Warm Point, UT	38.8194	113.467	Hintze (1974a)	USGS Map MF-633	1				clast in ash flow above fallout-surge layeres; up to 15 cm diameter
BRN-2PB	Cottonwood Wash Tuff		pumice clast	dacite	Warm Point, UT	38.8194	113.467	Hintze (1974a)	USGS Map MF-633	1				clast in ash flow above fallout-surge layeres; up to 15 cm diameter
BRN-4P	Cottonwood Wash Tuff		pumice clast	dacite	Warm Point, UT	38.7672	113.495	Hintze (1974a)	USGS Map MF-633					pumice and biot-plag inclusions collected from upper part of unwelded Cottonwood Wash tuff; reddish matrix; Wah Wah Springs tuff above
GOUGE-INCLUSION	Cottonwood Wash Tuff		cognate clast	granitic	The Gouge Eye, NV	38.5956	114.509	Loucks et al. (1989)	US Geol. Surv. Map I-1866
GOUGEWL-1-5P-1	Cottonwood Wash Tuff		pumice clast	dacite	Gouge Eye Well, NV	38.5956	114.509	Loucks et al. (1989)	US Geol. Surv. Map I-1866	1	1
GOUGEWL-1-5P-2	Cottonwood Wash Tuff		pumice clast	dacite	Gouge Eye Well, NV	38.5956	114.509	Loucks et al. (1989)	US Geol. Surv. Map I-1866	1	1
GOUGEWL-1-5PB	Cottonwood Wash Tuff		pumice clast	dacite	Gouge Eye Well, NV	38.5956	114.509	Loucks et al. (1989)	US Geol. Surv. Map I-1866	1	1
GOUGEWL-1-MID-1P	Cottonwood Wash Tuff		pumice clast	dacite	Gouge Eye Well, NV	38.5956	114.509	Loucks et al. (1989)	US Geol. Surv. Map I-1866	1	1
GOUGEWL-3P-1	Cottonwood Wash Tuff		pumice clast	dacite	Gouge Eye Well, NV	38.602	114.527	Loucks et al. (1989)	US Geol. Surv. Map I-1866	1
HFW-8-153-1P	Cottonwood Wash Tuff		pumice clast	dacite	Halfway Summit, UT	38.5569	113.855	Best and Hintze (1980)	US Geol. Surv. Map MF-1154					grapefruit-sized pumice clast at top of unit
KNOLL-1-38-1P-1	Cottonwood Wash Tuff		pumice clast	dacite	Knoll Hill, UT	39.1369	113.799			1	1
KNOLL-1-38-1P-2	Cottonwood Wash Tuff		pumice clast	dacite	Knoll Hill, UT	39.1369	113.799				1
KNOLL-1-38-1P-3	Cottonwood Wash Tuff		pumice clast	dacite	Knoll Hill, UT	39.1369	113.799			1	1
WARM-2P	Cottonwood Wash Tuff		pumice clast	dacite	Warm Point, UT	38.8178	113.463	Hintze (1974a)	USGS Map MF-633	1	1
WARM-4P	Cottonwood Wash Tuff		pumice clast	dacite	Warm Point, UT	38.818	113.465	Hintze (1974a)	USGS Map MF-633		1
GOUGEWL-1-0	Cottonwood Wash Tuff		surge	dacite	Gouge Eye Well, NV	38.5956	114.509	Loucks et al. (1989)	USGS Map I-1866
GOUGEWL-1-0.04	Cottonwood Wash Tuff		surge	dacite	Gouge Eye Well, NV	38.5956	114.509	Loucks et al. (1989)	USGS Map I-1866
GOUGEWL-1-0.06	Cottonwood Wash Tuff		surge	dacite	Gouge Eye Well, NV	38.5956	114.509	Loucks et al. (1989)	USGS Map I-1866
GOUGEWL-1-0.09	Cottonwood Wash Tuff		surge	dacite	Gouge Eye Well, NV	38.5956	114.509	Loucks et al. (1989)	USGS Map I-1866
GOUGEWL-1-0.12	Cottonwood Wash Tuff		surge	dacite	Gouge Eye Well, NV	38.5956	114.509	Loucks et al. (1989)	USGS Map I-1866
GOUGEWL-1-0.14	Cottonwood Wash Tuff		surge	dacite	Gouge Eye Well, NV	38.5956	114.509	Loucks et al. (1989)	USGS Map I-1866
GOUGEWL-1-0.21	Cottonwood Wash Tuff		surge	dacite	Gouge Eye Well, NV	38.5956	114.509	Loucks et al. (1989)	USGS Map I-1866
GOUGEWL-1-0.23	Cottonwood Wash Tuff		surge	dacite	Gouge Eye Well, NV	38.5956	114.509	Loucks et al. (1989)	USGS Map I-1866
GOUGEWL-1-0.24	Cottonwood Wash Tuff		surge	dacite	Gouge Eye Well, NV	38.5956	114.509	Loucks et al. (1989)	USGS Map I-1866
KNOLL-1	Cottonwood Wash Tuff		surge	dacite	Knoll Hill, UT	39.1361	113.799							many samples of tuff and pumice in strat section
KNOLL-1-0	Cottonwood Wash Tuff		surge	dacite	Knoll Hill, UT	39.1369	113.799
KNOLL-1-0.05	Cottonwood Wash Tuff		surge	dacite	Knoll Hill, UT	39.1369	113.799
KNOLL-1-0.07	Cottonwood Wash Tuff		surge	dacite	Knoll Hill, UT	39.1369	113.799
KNOLL-1-0.10	Cottonwood Wash Tuff		surge	dacite	Knoll Hill, UT	39.1369	113.799
KNOLL-1-0.13	Cottonwood Wash Tuff		surge	dacite	Knoll Hill, UT	39.1369	113.799
KNOLL-1-1.1	Cottonwood Wash Tuff		surge	dacite	Knoll Hill, UT	39.1369	113.799			1
WARM-5-0.35	Cottonwood Wash Tuff		surge	dacite	Warm Point, UT	38.818	113.465	Hintze (1974a)	USGS Map MF-633	1				layers 3, 4, and 5
WARM-5-0.38	Cottonwood Wash Tuff		surge	dacite	Warm Point, UT	38.818	113.465	Hintze (1974a)	USGS Map MF-633					layers 3, 4, and 5
BAILEY-1C	Deadman Spring, tuff of			rhyolite	Bailey Wash, NV	38.1528	114.763	Ekren et al. (1971)	US Geol. Surv. Map I-1041					vitrophyre sample -1CV
BAILEY-5A	Deadman Spring, tuff of			rhyolite	Bailey Wash, NV	38.1519	114.759	Ekren et al. (1971)	US Geol. Surv. Map I-1041	1				Five samples in strat sequence, -5A lowest, -5E highest
BAILEY-5B	Deadman Spring, tuff of			rhyolite	Bailey Wash, NV	38.1519	114.759	Ekren et al. (1971)	US Geol. Surv. Map I-1041	1				Five samples in strat sequence, -5A lowest, -5E highest
BAILEY-5C	Deadman Spring, tuff of			rhyolite	Bailey Wash, NV	38.1519	114.759	Ekren et al. (1971)	US Geol. Surv. Map I-1041	1				Five samples in strat sequence, -5A lowest, -5E highest
BAILEY-5D	Deadman Spring, tuff of			rhyolite	Bailey Wash, NV	38.1519	114.759	Ekren et al. (1971)	US Geol. Surv. Map I-1041	1				Five samples in strat sequence, -5A lowest, -5E highest
BAILEY-5E	Deadman Spring, tuff of			rhyolite	Bailey Wash, NV	38.1519	114.759	Ekren et al. (1971)	US Geol. Surv. Map I-1041	1				Five samples in strat sequence, -5A lowest, -5E highest
COYOT-1C	Deadman Spring, tuff of			rhyolite	Coyote Spring, NV	38.0208	114.867	Ekren and Page (1995)	US Geol. Surv. Open-File Rpt-95-550	1		1		Altered with CaO added
FAIRV-10	Deadman Spring, tuff of			rhyolite	Fairview Pk, NV	38.1408	114.735	Best et al. (1998)	Nevada Bur Mines & Geol. Map 114	1	1	1
FAIRV-11	Deadman Spring, tuff of			rhyolite	Fairview Pk, NV	38.2344	114.627	Best et al. (1998)	Nevada Bur Mines & Geol. Map 114			1
FAIRV-1-207-1	Deadman Spring, tuff of			rhyolite	Fairview Pk, NV	38.2261	114.626	Best et al. (1998)	Nevada Bur Mines & Geol. Map 114				1S
FAIRV-1-207-3A	Deadman Spring, tuff of			rhyolite	Fairview Pk, NV	38.2297	114.63	Best et al. (1998)	Nevada Bur Mines & Geol. Map 114					same as FAIRV-11
FAIRV-1-207-12	Deadman Spring, tuff of			rhyolite	Fairview Pk, NV	38.2417	114.63	Best et al. (1998)	Nevada Bur Mines & Geol. Map 114
FAIRV-3-162-1	Deadman Spring, tuff of			rhyolite	Bristol Well, NV	38.1231	114.73	Best et al. (1998)	Nevada Bur Mines & Geol. Map 114
FAIRV-3-162-2	Deadman Spring, tuff of			rhyolite	Fairview Pk, NV	38.1256	114.734	Best et al. (1998)	Nevada Bur Mines & Geol. Map 114
FAIRV-3-162-3	Deadman Spring, tuff of			rhyolite	Fairview Pk, NV	38.1267	114.739	Best et al. (1998)	Nevada Bur Mines & Geol. Map 114
FAIRV-3-191-1	Deadman Spring, tuff of			rhyolite	Grassy Mtn., NV	38.2656	114.685	Best et al. (1998)	Nevada Bur Mines & Geol. Map 114
FAIRV-7A	Deadman Spring, tuff of			rhyolite	Fairview Pk, NV	38.2175	114.677	Best et al. (1998)	Nevada Bur Mines & Geol. Map 114	1				sample -7A has smaller pheno than more typical -7B
FAIRV-7B	Deadman Spring, tuff of			rhyolite	Fairview Pk, NV	38.2175	114.677	Best et al. (1998)	Nevada Bur Mines & Geol. Map 114	1				sample -7A has smaller pheno than more typical -7B
WHEAT-3B	Deadman Spring, tuff of			rhyolite	Wheatgrass Spring, NV	37.8642	114.919	Scott et al (1994)	US Geol. Surv. Open-File Rpt-94-175	1	1	1
HFW-4	Escalante Desert Group	Beers Spring Fm.	rhyolite tuff in formation	rhyolite	Halfway Summit, UT	38.5589	113.86	Best and Hintze (1980)	USGS Map MF-1153		1			tuff lens(?) within lahars
MSP-8-227-1	Escalante Desert Group	intrusion		granite	Mountain Spring Peak, UT	38.1078	113.621	Best et al. (1987c)	US Geol. Surv. Map I-1794
MSP-9-37-6A	Escalante Desert Group	intrusion		dioritic	Mountain Spring Peak, UT	38.0842	113.524	Best et al. (1987c)	US Geol. Surv. Map I-1794
MSP-9-37-6B	Escalante Desert Group	intrusion		dioritic	Mountain Spring Peak, UT	38.0842	113.524	Best et al. (1987c)	US Geol. Surv. Map I-1794
HAM-2V	Escalante Desert Group	Lamerdorf Tuff	1st (lowest) of 3 cooling units	rhyolite	Hamblin Well, NV	38.4875	114.061	Best et al. (1989b)	US Geol. Surv. Map I-1881	1				lowest of three cooling units; sample of vitrophyre (-2V) and devitrifed (-2D)
HAM-2D	Escalante Desert Group	Lamerdorf Tuff	1st (lowest) of 3 cooling units	rhyolite	Hamblin Well, NV	38.4875	114.061	Best et al. (1989b)	US Geol. Surv. Map I-1881	1				lowest of three cooling units; sample of vitrophyre (-2V) and devitrifed (-2D)
HAM-3	Escalante Desert Group	Lamerdorf Tuff	2nd of 3 cooling units	rhyolite	Hamblin Well, NV	38.4875	114.061	Best et al. (1989b)	US Geol. Surv. Map I-1881	1			3P	middle of three cooling units; additional age analyses 32.11+/-0.17, 32.19+/-0.17
HAM-4	Escalante Desert Group	Lamerdorf Tuff	3rd of 3 cooling units	rhyolite	Hamblin Well, NV	38.4875	114.061	Best et al. (1989b)	US Geol. Surv. Map I-1881	1			2P	upper of three cooling units
HAM-7-58-1A	Escalante Desert Group	Lamerdorf Tuff		rhyolite	Hamblin Well, NV	38.4875	114.061	Best et al. (1989b)	US Geol. Surv. Map I-1881		1			sample of lowest (-1A), middle (-1B) and upper (-1C) of three cooling units
HAM-7-58-1B	Escalante Desert Group	Lamerdorf Tuff		rhyolite	Hamblin Well, NV	38.4875	114.061	Best et al. (1989b)	US Geol. Surv. Map I-1881		1			sample of lowest (-1A), middle (-1B) and upper (-1C) of three cooling units
HAM-7-58-1C	Escalante Desert Group	Lamerdorf Tuff		rhyolite	Hamblin Well, NV	38.4875	114.061	Best et al. (1989b)	US Geol. Surv. Map I-1881		1			sample of lowest (-1A), middle (-1B) and upper (-1C) of three cooling units
HFW-1V	Escalante Desert Group	Lamerdorf Tuff	lower	rhyolite	Halfway Summit, UT	38.5097	113.858	Best and Hintze (1980)	US Geol. Surv. Map MF-1153	1	1			sample of vitrophyre (-1V) and devitrifed (-1D)
HFW-1D	Escalante Desert Group	Lamerdorf Tuff	lower	rhyolite	Halfway Summit, UT	38.5097	113.858	Best and Hintze (1980)	US Geol. Surv. Map MF-1153	1				sample of vitrophyre (-1V) and devitrifed (-1D)
HFW-2V	Escalante Desert Group	Lamerdorf Tuff	upper	rhyolite	Halfway Summit, UT	38.5097	113.858	Best and Hintze (1980)	US Geol. Surv. Map MF-1153	1	1
LAM-9-71-1	Escalante Desert Group	Lamerdorf Tuff		rhyolite	Frisco, UT	38.3125	113.496	Abbott et al. (1983)	US Geol. Surv. Map I-1479					vitrophyre
LUND-3	Escalante Desert Group	Lamerdorf Tuff	lower	rhyolite	Lund, UT	38.0333	113.452	Hintze et al. (1994b)	US Geol. Surv. Map I-2361	1	1	1	1P	Mark Hudson site B98-2
LUND-4D	Escalante Desert Group	Lamerdorf Tuff	middle	rhyolite	Lund, UT	38.0336	113.453	Hintze et al. (1994b)	US Geol. Surv. Map I-2361	1	1
MIN-8-61-3	Escalante Desert Group	Lamerdorf Tuff		rhyolite	Miners Cabin Wash, UT	38.3081	113.922	Best et al. (1987b)	US Geol. Surv. Map I-1796
SWP-3V	Escalante Desert Group	Lamerdorf Tuff		rhyolite	Sawtooth Peak, UT	38.403	113.868	Best et al. (1987b)	USGS Map I-1796	1
TET-9-75-1	Escalante Desert Group	Lamerdorf Tuff?		rhyolite	The Tetons, UT	38.2219	113.53	Best et al. (1987c)	USGS Map I-1794	1
ATL-1	Escalante Desert Group	andesite lava flow fm.		andesitic	Atlanta, NV	38.4636	114.26	Willis et al. (1987)	US Geol. Surv. Map MF-1971	1				chemical analysis in Barr (1993)
GRASSYM-3-194-2	Escalante Desert Group?	andesite lava flow fm.		andesitic	Grassy Mtn., NV	38.3186	114.666	Best et al. (1998)	Nevada Bur Mines & Geol. Map 114					underlies Windous Butte tuff
HOR-2	Escalante Desert Group?	andesite lava flow fm		andesitic	Horse Corral Pass, NV	38.4928	114.483	Willis et al. (1987)	US Geol. Surv. Map MF-1971					underlies Windous Butte tuff
LAM-1G	Escalante Desert Group	andesite lava flow fm.		andesitic	Lamerdorf Peak, UT	38.3133	113.5	Abbott et al. (1983)	US Geol. Surv. Map I-1479	1				same area as LAM -9-71-2; glassy (-1G)
LAM-1C	Escalante Desert Group	andesite lava flow fm.		andesitic	Lamerdorf Peak, UT	38.3133	113.5	Abbott et al. (1983)	US Geol. Surv. Map I-1479	1			2P	same area as LAM -9-71-2; crystalline (-1C)
LAM-9-71-2	Escalante Desert Group	andesite lava flow fm.		andesitic	Lamerdorf Peak, UT	38.3133	113.5	Abbott et al. (1983)	US Geol. Surv. Map I-1479	1				same area as LAM -1; Chemical analysis and age in Best et al. (2009)
LAM-9-71-3	Escalante Desert Group	andesite lava flow fm.		andesitic	Lamerdorf Peak, UT	38.3117	113.503	Abbott et al. (1983)	US Geol. Surv. Map I-1479	1				Chemical analysis and age in Best et al. (2009)
MSP-1	Escalante Desert Group	andesite lava flow fm.		andesitic	Mountain Spring Peak, UT	38.0817	113.532	Best et al. (1987c)	US Geol. Surv. Map I-1794	1				same area as MSP -9-37-4
MSP-4	Escalante Desert Group	andesite lava flow fm.		andesitic	Mountain Spring Peak, UT	38.1014	113.518	Best et al. (1987c)	US Geol. Surv. Map I-1794	1
MSP-9-38-1	Escalante Desert Group	andesite lava flow fm.		andesitic	Mountain Spring Peak, UT	38.1111	113.554	Best et al. (1987c)	US Geol. Surv. Map I-1794	1				Chemical analysis and age in Best et al. (2009)
SILVER-1G	Escalante Desert Group	andesite lava flow fm.		andesite	Silver King Mtn., NV	38.209	114.963	Ekren et al. (1971)	US Geol. Surv. Map I-1041	1
SILVER-1S	Escalante Desert Group	andesite lava flow fm.		andesite	Silver King Mtn., NV	38.209	114.963	Ekren et al. (1971)	US Geol. Surv. Map I-1041	1
SILVER-1SM	Escalante Desert Group	andesite lava flow fm.		andesite	Silver King Mtn., NV	38.209	114.963	Ekren et al. (1971)	US Geol. Surv. Map I-1041	1
SILVER-2	Escalante Desert Group	andesite lava flow fm.		dacitic	Silver King Mtn., NV	38.205	114.963	Ekren et al. (1971)	US Geol. Surv. Map I-1041	1
SILVERSW-1	Escalante Desert Group	andesite lava flow fm.		dacitic	Silver King Mtn. SW, NV	38.106	114.958	Ekren et al. (1971)	US Geol. Surv. Map I-1041	1
SILVRWL-1A	Escalante Desert Group	andesite lava flow fm.		dacitic	Silver King Well, NV	38.3117	114.974	Ekren et al. (1971)	US Geol. Surv. Map I-1041
SILVRWL-2	Escalante Desert Group	andesite lava flow fm.		andesitic	Silver King Well, NV	38.311	114.978	Ekren et al. (1971)	US Geol. Surv. Map I-1041	1
SWP-1	Escalante Desert Group	andesite lava flow fm.		andesitic	Sawtooth Peak, UT	38.4028	113.843	Best et al. (1987b)	USGS Map I-1796	1
SWP-2	Escalante Desert Group	andesite lava flow fm.		andesitic	Sawtooth Peak, UT	38.397	113.843	Best et al. (1987b)	USGS Map I-1796	1				nearly aphyric
TET-1	Escalante Desert Group	andesite lava flow fm.		andesitic	The Tetons, UT	38.2256	113.569	Best et al. (1987c)	US Geol. Surv. Map I-1794	1
TET-9-13-2	Escalante Desert Group	andesite lava flow fm.		andesitic	The Tetons, UT	38.2214	113.571	Best et al. (1987c)	US Geol. Surv. Map I-1794	1				Chemical analysis and age in Best et al. (2009)
TET-9-43-3	Escalante Desert Group	andesite lava flow fm.		dacitic	The Tetons, UT	38.22	113.571	Best et al. (1987c)	US Geol. Surv. Map I-1794	1
TET-9-77-4A	Escalante Desert Group	andesite lava flow fm.		andesite	The Tetons, UT	38.18	113.516	Best et al. (1987c)	US Geol. Surv. Map I-1794
TET-9-77-4B	Escalante Desert Group	andesite lava flow fm.		andesitic	The Tetons, UT	38.18	113.516	Best et al. (1987c)	US Geol. Surv. Map I-1794	1				Chemical analysis and age in Best et al. (2009)
ATL-1-70-3	Escalante Desert Group	rhyolite lava flow fm.		rhyolitic	Atlanta, NV	38.4725	114.358	Willis et al. (1987)	US Geol. Surv. Map MF-1971					34.8 +/- 3.2 Ma (Kowallis and Best, 1990) ; possible shallow intrusion; variably altered; lies along margin of Indian Peak Caldera
ATL-1-70-5	Escalante Desert Group	rhyolite lava flow fm.		rhyolitic	Atlanta, NV	38.4581	114.343	Willis et al. (1987)	US Geol. Surv. Map MF-1971	1				32.7 +/-2.8 Ma (Kowallis and Best, 1990); possible shallow intrusion; variably altered; lies along margin of Indian Peak Caldera
HOR-1-69-1	Escalante Desert Group	rhyolite lava flow fm.		rhyolitic	Horse Corral Pass, NV	38.4658	114.391	Willis et al. (1987)	US Geol. Surv. Map MF-1971					altered; called Ryan Spring Formation
HOR-1-70-4	Escalante Desert Group	rhyolite lava flow fm.		rhyolitic	Horse Corral Pass, NV	38.4742	114.397	Willis et al. (1987)	US Geol. Surv. Map MF-1971	1				35.6 +/- 3.2 Ma (Kowallis and Best, 1990)possible shallow intrusion; variably altered; lies along margin of Indian Peak Caldera
LAM-9-18-2	Escalante Desert Group	rhyolite lava flow fm.		rhyolitic	Lamerdorf Peak, UT	38.3008	113.578	Abbott et al. (1983)	US Geol. Surv. Map I-1479	1				unit Toa ("older andesite")
MIN-8-108-2	Escalante Desert Group	rhyolite lava flow fm.		rhyolitic	Miners Cabin Wash, UT	38.2789	113.896	Best et al. (1987b)	US Geol. Surv. Map I-1796
MIN-8-109-5	Escalante Desert Group	rhyolite lava flow fm.		rhyolitic	Miners Cabin Wash, UT	38.2786	113.891	Best et al. (1987b)	US Geol. Surv. Map I-1796
MIN-8-60-4	Escalante Desert Group?	rhyolite lava flow fm.		rhyolitic	Miners Cabin Wash, UT	38.2789	113.906	Best et al. (1987b)	US Geol. Surv. Map I-1796
MIN-8-60-9	Escalante Desert Group	rhyolite lava flow fm.?		rhyolitic	Miners Cabin Wash, UT	38.2897	113.903	Best et al. (1987b)	US Geol. Surv. Map I-1796
MIN-8-60-10	Escalante Desert Group	rhyolite lava flow fm.		rhyolitic	Miners Cabin Wash, UT	38.295	113.917	Best et al. (1987b)	US Geol. Surv. Map I-1796	1
MSP-2	Escalante Desert Group	rhyolite lava flow fm.		rhyolitic	Mountain Spring Peak, UT	38.0794	113.527	Best et al. (1987c)	US Geol. Surv. Map I-1794	1				also sample -2D of devitrified
MSP-3	Escalante Desert Group	rhyolite lava flow fm.		rhyolitic	Mountain Spring Peak, UT	38.0794	113.522	Best et al. (1987c)	US Geol. Surv. Map I-1794	1				same as MSP -9-37-5; also sample of vitrophyre
MSP-8-227-2	Escalante Desert Group	rhyolite lava flow fm.		rhyolitic	Mountain Spring Peak, UT	38.0972	113.618	Best et al. (1987c)	US Geol. Surv. Map I-1794
MSP-8-227-3	Escalante Desert Group	rhyolite lava flow fm.		rhyolitic	Mountain Spring Peak, UT	38.0847	113.61	Best et al. (1987c)	US Geol. Surv. Map I-1794
MSP-9-37-1	Escalante Desert Group	rhyolite lava flow fm.		rhyolitic	Mountain Spring Peak, UT	38.0717	113.544	Best et al. (1987c)	US Geol. Surv. Map I-1794	1
MSP-9-37-5	Escalante Desert Group	rhyolite lava flow fm.		rhyolitic	Mountain Spring Peak, UT	38.0794	113.522	Best et al. (1987c)	US Geol. Surv. Map I-1794					same as MSP -3
MSP-9-8-3	Escalante Desert Group	rhyolite lava flow fm.		rhyolitic	Mountain Spring Peak, UT	38.0869	113.564	Best et al. (1987c)	US Geol. Surv. Map I-1794
LUND-1	Escalante Desert Group	Mardsen Tuff		rhyolitic	Lund, UT	38.0506	113.456	Hintze et al. (1994b)	US Geol. Surv. Map I-2361			1		samples of lower (-1L) and upper (-1U) parts
MIN-8-107-2	Escalante Desert Group	Mardsen Tuff		rhyolitic	Miners Cabin Wash, UT	38.2911	113.879	Best et al. (1987b)	US Geol. Surv. Map I-1796
MIN-8-107-5	Escalante Desert Group	Mardsen Tuff		rhyolitic	Miners Cabin Wash, UT	38.2925	113.881	Best et al. (1987b)	US Geol. Surv. Map I-1796	1				altered
MSP-9-37-2	Escalante Desert Group	Mardsen Tuff		rhyolitic	Mountain Spring Peak, UT	38.0775	113.541	Best et al. (1987c)	US Geol. Surv. Map I-1794
TET-9-77-3	Escalante Desert Group	Mardsen Tuff		rhyolitic	The Tetons, UT	38.18	113.516	Best et al. (1987c)	US Geol. Surv. Map I-1794	1				altered
LUND-1L	Escalante Desert Group	Marsden tuff	lower	rhyolitic	Lund, UT	38.0508	113.456	Hintze et al. (1994b)	USGS Map I-2361	1	1	1
LUND-1U	Escalante Desert Group	Marsden tuff	upper	rhyolitic	Lund, UT	38.0508	113.456	Hintze et al. (1994b)	USGS Map I-2361	1	1
CEDARNW-1C	Harmony Hills Tuff			andesite	Cedar City NW, UT	37.7047	113.195	Mackin et al. (1976)	US Geol. Surv. Map GQ-125
CND-1U	Harmony Hills Tuff			andesite	Condor Canyon, NV	37.8592	114.325	G.J. Axen	Unpub. Map of Gary Axen	1		1
CND-3	Harmony Hills Tuff			andesite	Condor Canyon, NV	37.844	114.339						2P
DES-1B	Harmony Hills Tuff			andesite	Desert Mound, UT	37.6356	113.271			1		1
PAHRAN-1F	Harmony Hills Tuff			andesite	Lower Pahranagat Lake, NV	37.1633	115.065			1
PAHRC-1Q	Harmony Hills Tuff			andesite	Pahroc Spring, NV	37.6269	114.996	Scott et al. (1992)	US Geol. Surv. Open-File Rpt-92-613			1
PRO-3-287-1	Harmony Hills Tuff			andesite	Panaca Summit, NV	37.7853	114.01	Williams et al. (1997)	US Geol. Surv. Map I-2479
CHIEF-1M	Hiko Tuff			rhyolite	Chief Mountain, NV	37.7589	114.589	Rowley et al. (1994)	Unpub. Map of K. Burke & G. Axen
CHOKE-1	Hiko Tuff			rhyolite	Chokecherry Mtn., NV	37.5978	114.673	Ekren et al. (1971)	US Geol. Surv. Map I-1041
CND-1V	Hiko Tuff			rhyolite	Condor Canyon, NV	37.8594	114.324	G.J. Axen	Unpub. Map of Gary Axen			1	1S
HANCSUM-1K	Hiko Tuff			rhyolite	Hancock Summit, NV	37.44	115.377	Ekren et al. (1971)	US Geol. Surv. Map I-1041			1
PAHRC-1R	Hiko Tuff			rhyolite	Pahroc Spring, NV	37.6292	114.992	Scott et al. (1992)	US Geol. Surv. Open-File Rpt-92-613			3	1S
WHRN-1L	Hiko Tuff			rhyolite	White River Narrows, NV	37.8333	115.019	du Bray and Hurtubise (1994)	US Geol. Surv. Maps I-2282 and I-1041			1
BAN-10	hornblende andesite, Tha	lava		andesite	Bannion Spring, UT	37.9334	113	Best (1987)	USGS Map I-1774	1				Same flow as BAN-11
BAN-11	hornblende andesite, Tha	lava		andesite	Bannion Spring, UT	38.8663	113.829	Best (1987)	USGS Map I-1774	1				Same flow as BAN-10
BAN-8-127-3	hornblende andesite, Tha	lava		andesitic	Bannion Spring, UT	37.9728	113.855	Best (1987)	US Geol. Surv. Map I-1774	1				fresh, glassy; Chemical analysis and age in Best et al. (2009)
BAN-8-165-1	hornblende andesite, Tha	lava		andesitic	Bannion Spring, UT	37.9725	113.777	Best (1987)	US Geol. Surv. Map I-1774	1				fresh, glassy; Chemical analysis and age in Best et al. (2009)
BBS-5-32-1A	hornblende andesite, Tha	lava		andesitic	Bible Spring, UT	37.9964	113.676	Best et al. (1987c)	US Geol. Surv. Map I-1794	1				glassy; hrnbl pheno; Chemical analysis and age in Best et al. (2009)
MOD-10	hornblende andesite, Tha	lava		andesitic	Modena, UT	37.8563	113.939	Best (1987)	US Geol. Surv. Map I-1774	1				hornblende micro phenocrysts
MOD-11	hornblende andesite, Tha	lava		andesitic	Modena, UT	37.8561	113.94	Best (1987)	US Geol. Surv. Map I-1774	1				hornblende micro phenocrysts
MOD-12	hornblende andesite, Tha	lava		andesitic	Modena, UT	37.8555	113.94	Best (1987)	US Geol. Surv. Map I-1774	1
MOD-13	hornblende andesite, Tha	lava		andesitic	Modena, UT	37.8565	113.899	Best (1987)	USGS Map I-1774	1				unit Tlf
MSP-9-6-1	hornblende andesite, Tha	lava		andesitic	Mountain Spring Peak, UT	38.0294	113.598	Best et al. (1987c)	US Geol. Surv. Map I-1794	1				phenocrysts of hornblende, plagioclase and pyroxene; Chemical analysis and age in Best et al. (2009); sample oxidized
FRSC-2-43-1	Hornsilver Andesite	lava		andesitic	Frisco, UT	38.4183	113.293	Best et al. (1989a)	US Geol. Surv. Map I-1904
FRSC-2-43-2	Hornsilver Andesite	lava		andesitic	Frisco, UT	38.4206	113.287	Best et al. (1989a)	US Geol. Surv. Map I-1904
FRSC-2-43-4	Hornsilver Andesite	lava		andesitic	Frisco, UT	38.4319	113.28	Best et al. (1989a)	US Geol. Surv. Map I-1904	1				Chemical analysis and age in Best et al. (2009)
FRSC-4	Hornsilver Andesite	lava		andesitic	Frisco, UT	38.4317	113.28	Best et al. (1989a)	US Geol. Surv. Map I-1904
CND-1C	Isom Fm.	Bald Hills Tuff Mbr.	1st (lowest) of 3 cooling units	trachydacite	Condor Canyon, NV	37.8328	114.358	G.J. Axen	Unpub. Map of Gary Axen	1		1	3P
CND-1D	Isom Fm.	Bald Hills Tuff Mbr.	2nd of 3 cooling units	trachydacite	Condor Canyon, NV	37.8333	114.358	G.J. Axen	Unpub. Map of Gary Axen	1		1
CND-1E	Isom Fm.	Bald Hills Tuff Mbr.	3rd of 3 cooling units	trachydacite	Condor Canyon, NV	37.8339	114.357	G.J. Axen	Unpub. Map of Gary Axen	1		1	4P
CND-8B	Isom Fm.	Bald Hills Tuff Mbr.	4th of 4? cooling units	trachydacite	Condor Canyon, NV	37.845	114.336	G.J. Axen	Unpub. Map of Gary Axen	1		1
CND-8C	Isom Fm.	Bald Hills Tuff Mbr.	3rd of 4? cooling units	trachydacite	Condor Canyon, NV	37.845	114.336	G.J. Axen	Unpub. Map of Gary Axen	1				strongly lineated; underlies -8B
CND-8D	Isom Fm.	Bald Hills Tuff Mbr.	2nd of 4? Cooling units	trachydacite	Condor Canyon, NV	37.845	114.337	G.J. Axen	Unpub. Map of Gary Axen	1		1
CND-8I	Isom Fm.	Bald Hills Tuff Mbr.	3rd of 3 cooling units	trachydacite	Condor Canyon, NV	37.8336	114.358	G.J. Axen	Unpub. Map of Gary Axen	1		1		same as CND-1E
CND-8J	Isom Fm.	Bald Hills Tuff Mbr.	2nd of 3 cooling units	trachydacite	Condor Canyon, NV	37.8331	114.358	G.J. Axen	Unpub. Map of Gary Axen	1		1		same as CND-1D
CND-8K	Isom Fm.	Bald Hills Tuff Mbr.	1st (lowest) of 3 cooling units	trachydacite	Condor Canyon, NV	37.8319	114.359	G.J. Axen	Unpub. Map of Gary Axen	1		1		same as CND-1C
DELM3SE-1B	Isom Fm.	Bald Hills Tuff Mbr.		trachydacite	Delamar 3 SE, NV	37.1017	114.847		USGS Map GQ-1754	1		1
ELYS-1K	Isom Fm.	Bald Hills Tuff Mbr.		trachydacite	Ely Springs, NV	37.92	114.651	G.J. Axen	Unpub. Map of Gary Axen
ELYS-2B	Isom Fm.	Bald Hills Tuff Mbr.		trachydacite	Ely Springs, NV	37.9625	114.643	G.J. Axen	Unpub. Map of Gary Axen	1		1
ELYS-2C	Isom Fm.	Bald Hills Tuff Mbr.	upper	trachydacite	Ely Springs, NV	37.9625	114.643	G.J. Axen	Unpub. Map of Gary Axen	1		1
FIVE-1	Isom Fm.	Bald Hills Tuff Mbr.		trachydacite	Fivemile Ridge, UT	37.7617	112.516
CHIEF-1C	Isom Fm.	Bald Hills Tuff Mbr.	lower	trachydacite	Chief Mountain, NV	37.75	114.6	Rowley et al. (1994)	Unpub. Map of K. Burke & G. Axen	1				samples of lower (-!CL) and upper (-1CU) parts of unit
HOR-1-70-13	Isom Fm.	Bald Hills Tuff Mbr.		trachydacite	Horse Corral Pass, NV	38.4719	114.402	Willis et al. (1987)	US Geol. Surv. Map MF-1971	1			1P
GOUGEWL-1-165-1A	Isom Fm.	Bald Hills Tuff Mbr.		trachydacite	Gouge Eye Well, NV	38.5983	114.525	Loucks et al. (1989)	US Geol. Surv. Map I-1866	1		1		lower pink part of unit
GOUGEWL-1-165-1B	Isom Fm.	Bald Hills Tuff Mbr.		trachydacite	Gouge Eye Well, NV	38.5983	114.525	Loucks et al. (1989)	US Geol. Surv. Map I-1866	1		1		black vitrophyre
HANCSUM-1B	Isom Fm.	Bald Hills Tuff Mbr.		trachydacite	Hancock Summit, NV	37.4264	115.367	Ekren et al. (1971)	US Geol. Surv. Map I-1041	1		1
PAHRC-1A	Isom Fm.	Bald Hills Tuff Mbr.		trachydacite	Pahroc Spring, NV	37.6686	115.991	Scott et al. (1992)	US Geol. Surv. Open-File Rpt-92-613	1		1
PAHRC-2F	Isom Fm.	Bald Hills Tuff Mbr.		trachydacite	Pahroc Spring, NV	37.7056	114.937	Scott et al. (1992)	US Geol. Surv. Open-File Rpt-92-613	1		1
WEEP-1F	Isom Fm.	Bald Hills Tuff Mbr.		trachydacite	Weepah Spring, NV	37.8958	115.022	du Bray and Hurtubise (1994)	US Geol. Surv. Map MF-1922 and Bull. 2052	1
THREE-2D	Isom Fm.	Bald Hills Tuff Mbr.	1st (lowest) of 3 cooling units	trachydacite	The Three Peaks, UT	37.8217	113.221	Mackin and Rowley (1976)	US Geol. Surv. Map GQ-1297	1				devitrified
THREE-3D	Isom Fm.	Bald Hills Tuff Mbr.	2nd of 3 cooling units	trachydacite	The Three Peaks, UT	37.8219	113.221	Mackin and Rowley (1976)	Utah Geol. Min. Surv. Map 103	1				devitrified
THREE-4D	Isom Fm.	Bald Hills Tuff Mbr.	3rd of 3 cooling units	trachydacite	The Three Peaks, UT	37.8219	113.22	Mackin and Rowley (1976)	Unpub. Map of Gary Axen	1				devitrified
THREE-5B	Isom Fm.	Bald Hills Tuff Mbr.	3rd of 3 cooling units	trachydacite	The Three Peaks, UT	37.8175	113.218	Mackin and Rowley (1976)	US Geol. Surv. Map GQ-1297	1		1		same as THREE-3D
THREE-5C	Isom Fm.	Bald Hills Tuff Mbr.	2nd of 3 cooling units	trachydacite	The Three Peaks, UT	37.8183	113.219	Mackin and Rowley (1976)	US Geol. Surv. Map GQ-1297	1		1
THREE-5D	Isom Fm.	Bald Hills Tuff Mbr.	1st (lowest) of 3 cooling units	trachydacite	The Three Peaks, UT	37.8192	113.221	Mackin and Rowley (1976)	US Geol. Surv. Map GQ-1297	1		1	1P
LAM-2D	Isom Fm.	Bald Hills Tuff Mbr.	lower	trachydacite	Lamerdorf Peak, UT	38.3628	113.506	Abbott et al. (1983)	US Geol. Surv. Map I-1479	1				sample of vitrophyre (-2V) and devitrified (-2D)
LAM-2V	Isom Fm.	Bald Hills Tuff Mbr.	lower	trachydacite	Lamerdorf Peak, UT	38.3628	113.506	Abbott et al. (1983)	US Geol. Surv. Map I-1479	1	1			sample of vitrophyre (-2V) and devitrified (-2D)
LAM-3D	Isom Fm.	Bald Hills Tuff Mbr.	upper	trachydacite	Lamerdorf Peak, UT	38.3628	113.506	Abbott et al. (1983)	US Geol. Surv. Map I-1479	1	1			sample of vitrophyre (-3V) and devitrified (-3D)
LAM-3V	Isom Fm.	Bald Hills Tuff Mbr.	upper	trachydacite	Lamerdorf Peak, UT	38.3628	113.506	Abbott et al. (1983)	US Geol. Surv. Map I-1479	1				sample of vitrophyre (-3V) and devitrified (-3D)
MLLR-9-164-3	Isom Fm.	Bald Hills Tuff Mbr.		trachydacite	Miller Canyon, NV	38.255	114.218	Best et al. (1989b)	US Geol. Surv. Map I-1881	1
MUDSP-1D	Isom Fm.	Bald Hills Tuff Mbr.	lowest cooling unit	trachydacite	Enoch NW, UT	37.96	113.19			1				don't confuse Utah MUDSP samples with Nevada MUDSP samples
MUDSP-2V	Isom Fm.	Bald Hills Tuff Mbr.	second cooling unit	trachydacite	Enoch NW, UT	37.96	113.19			1				don't confuse Utah MUDSP samples with Nevada MUDSP samples
STM-8-169-5	Isom Fm.	Bald Hills Tuff Mbr.		trachydacite	Steamboat Mtn.., UT	38.0283	113.816	Best et al. (1987a)	US Geol. Surv. Map I-1795	1
TRC-1-61-1	Isom Fm.	Bald Hills Tuff Mbr.		trachydacite	Trail Canyon, NV	38.2614	114.354	Willis et al. (1987)	USGS Map MF-1971	1				vitrophyric weakly welded; same location as TRC -1-505-1
TRC-1D	Isom Fm.	Bald Hills Tuff Mbr.	lowest	trachydacite	Trail Canyon, NV	38.2583	114.289	Willis et al. (1987)	US Geol. Surv. Map MF-1971	1				vitrophyric (-1V) and devitrified (-1D) samples
TRC-1V	Isom Fm.	Bald Hills Tuff Mbr.	lowest	trachydacite	Trail Canyon, NV	38.2583	114.289	Willis et al. (1987)	US Geol. Surv. Map MF-1971	1	1			vitrophyric (-1V) and devitrified (-1D) samples
TRC-2D	Isom Fm.	Bald Hills Tuff Mbr.	middle	trachydacite	Trail Canyon, NV	38.2553	114.293	Willis et al. (1987)	US Geol. Surv. Map MF-1971	1				vitrophyric (-2V) and devitrified (-2D) samples
TRC-2V	Isom Fm.	Bald Hills Tuff Mbr.	middle	trachydacite	Trail Canyon, NV	38.2553	114.293	Willis et al. (1987)	US Geol. Surv. Map MF-1971	1	1			vitrophyric (-2V) and devitrified (-2D) samples
TRC-3D	Isom Fm.	Bald Hills Tuff Mbr.	upper	trachydacite	Trail Canyon, NV	38.2539	114.291	Willis et al. (1987)	US Geol. Surv. Map MF-1971	1				vitrophyric (-3V) and devitrified (-3D) samples
TRC-3V	Isom Fm.	Bald Hills Tuff Mbr.	upper	trachydacite	Trail Canyon, NV	38.2539	114.291	Willis et al. (1987)	US Geol. Surv. Map MF-1971	1	1			vitrophyric (-3V) and devitrified (-3D) samples
WEEP-1E	Isom Fm.	Bald Hills Tuff Mbr.		trachydacite	Weepah Spring, NV	37.8958	115.022	du Bray and Hurtubise (1994)	US Geol. Surv. Map MF-1922 and Bull. 2052	1		1		sample (-1EV) of vitrophyre
WHEAT-1FL	Isom Fm.	Bald Hills Tuff Mbr.		trachydacite	Wheatgrass Spring, NV	37.8269	114.937	Scott et al (1994)	US Geol. Surv. Open-File Rpt-94-175	1
WHEAT-1FU	Isom Fm.	Bald Hills Tuff Mbr.		trachydacite	Wheatgrass Spring, NV	37.8269	114.937	Scott et al (1994)	US Geol. Surv. Open-File Rpt-94-175	1
WHEAT-1FU2	Isom Fm.	Bald Hills Tuff Mbr.		trachydacite	Wheatgrass Spring, NV	37.8269	114.937	Scott et al (1994)	US Geol. Surv. Open-File Rpt-94-175	1
WHRN-2D	Isom Fm.	Bald Hills Tuff Mbr.		trachydacite	White River Narrows, NV	37.8617	115.02	du Bray and Hurtubise (1994)	US Geol. Surv. Maps I-2282 and I-1041	1		1	1P
CND-1L	Isom Fm.	Hamlight Tuff Mbr.	1st of 4 cooling units, CC west	trachydacite	Condor Canyon, NV	37.84	114.351	G.J. Axen	Unpub. Map of Gary Axen	1	1	1	1P
CND-1M	Isom Fm.	Hamlight Tuff Mbr.	2nd of 4 cooling units	trachydacite	Condor Canyon, NV	37.85	114.35	G.J. Axen	Unpub. Map of Gary Axen	1	1	1
CND-8FL	Isom Fm.	Hamlight Tuff Mbr.	4th of 4 cooling units	trachydacite	Condor Canyon, NV	37.8408	114.35	G.J. Axen	Unpub. Map of Gary Axen	1		1		lower (-8FL) and upper (-8FU) parts of compound cooling unit
CND-8FU	Isom Fm.	Hamlight Tuff Mbr.	4th of 4 cooling units	trachydacite	Condor Canyon, NV	37.8408	114.35	G.J. Axen	Unpub. Map of Gary Axen	1	1	1	1P	lower (-8FL) and upper (-8FU) parts of compound cooling unit
CND-8G	Isom Fm.	Hamlight Tuff Mbr.	2nd of 4 cooling units	trachydacite	Condor Canyon, NV	37.8406	114.351	G.J. Axen	Unpub. Map of Gary Axen	1		1	1P
CND-8H	Isom Fm.	Hamlight Tuff Mbr.	1st (lowest)of 4 cooling units	trachydacite	Condor Canyon, NV	37.8403	114.351	G.J. Axen	Unpub. Map of Gary Axen	1		1	1P, 1S
PAHRC-1GD	Isom Fm.	Hamlight Tuff Mbr.	lower	trachydacite	Pahroc Spring, NV	37.6717	114.997	Scott et al. (1992)	US Geol. Surv. Open-File Rpt-92-613	1		2		devitrified
PAHRC-1GV	Isom Fm.	Hamlight Tuff Mbr.	lower	trachydacite	Pahroc Spring, NV	37.6717	114.997	Scott et al. (1992)	US Geol. Surv. Open-File Rpt-92-613	1		2		vitrophyre
PAHRC-1H	Isom Fm.	Hamlight Tuff Mbr.	upper	trachydacite	Pahroc Spring, NV	37.6717	114.996	Scott et al. (1992)	US Geol. Surv. Open-File Rpt-92-613	1		1
CND-1N	Isom Fm.	Hole-in-the-Wall Tuff Mbr.		low-silic rhy	Condor Canyon, NV	37.85	114.35	G.J. Axen	Unpub. Map of Gary Axen	1	1	1
CND-8A	Isom Fm.	Hole-in-the-Wall Tuff Mbr.		low-silic rhy	Condor Canyon, NV	37.8581	114.333	G.J. Axen	Unpub. Map of Gary Axen	1		1
CND-8E	Isom Fm.	Hole-in-the-Wall Tuff Mbr.		low-silic rhy	Condor Canyon, NV	37.9903	114.349	G.J. Axen	Unpub. Map of Gary Axen	1		1	2P	locations of samples CND-8E to 8K from Deino's GPS device
PAHRC-1J	Isom Fm.	Hole-in-the-Wall Tuff Mbr.		trachydacite	Pahroc Spring, NV	37.6717	114.996	Scott et al. (1992)	US Geol. Surv. Open-File Rpt-92-613	1	1	1
THREE-5A	Isom Fm.	Hole-in-the-Wall Tuff Mbr.		trachydacite	The Three Peaks, UT	37.815	113.217	Mackin and Rowley (1976)	US Geol. Surv. Map GQ-1297			1
WHRN-1CD	Isom Fm.	Hole-in-the-Wall Tuff Mbr.		trachydacite	White River Narrows, NV	37.85	115.019	du Bray and Hurtubise (1994)	US Geol. Surv. Maps I-2282 and I-1041	1	1	1		devitrified
WHRN-1CV	Isom Fm.	Hole-in-the-Wall Tuff Mbr.		trachydacite	White River Narrows, NV	37.85	115.019	du Bray and Hurtubise (1994)	US Geol. Surv. Maps I-2282 and I-1041	1	1	1		vitrophyre
ATL-1-68-2	Isom Fm.	undivided tuff mbr.		trachydacite	Atlanta, NV	38.4231	114.371	Willis et al. (1987)	US Geol. Surv. Map MF-1971					basal vitrophyre
ENOCHNW-1D	Isom Fm.	undivided tuff mbr.	lower cooling unit	trachydacite	Enoch NW, UT			Rowley (1976)	USGS Map GQ-1302	1				formerly MUDSP-1D
ENOCHNW-2V	Isom Fm.	undivided tuff mbr.	second cooling unit	trachydacite	Enoch NW, UT			Rowley (1976)	Utah Geol. Min. Surv. Map 103	1				formerly MUDSP-2V
FRSCPK-1	Isom Fm.	undivided tuff mbr.		trachydacite	Frisco Peak, UT	38.7497	113.341	Hintze et al. (1984)	US Geol. Surv. Map I-1573
GLE-6-100-2	Isom Fm.?	undivided tuff mbr.		trachydacite	Gleason Basin NV	38.3375	114.108	Best et al. (1989b)	US Geol. Surv. Map I-1881
HOR-1-489-1	Isom Fm.	undivided tuff mbr.		trachydacite	Horse Corral Pass, NV	38.5	114.427	Willis et al. (1987)	US Geol. Surv. Map MF-1971
MLLR-6-17-1	Isom Fm.	undivided tuff mbr.	lower	trachydacite	Miller Canyon, NV	38.2733	114.19	Best et al. (1989b)	US Geol. Surv. Map I-1881	1	1			lowest of three (four?) cooling units
MLLR-6-17-2	Isom Fm.	undivided tuff mbr.	upper	trachydacite	Miller Canyon, NV	38.2719	114.187	Best et al. (1989b)	US Geol. Surv. Map I-1881	1	1			upper of three(?) cooling units
URS-3-218-1A	Isom Fm.	undivided tuff mbr.	lower	trachydacite	Ursine, NV	38.9383	114.248	Williams et al. (1997)	USGS Map I-2479
URS-3-218-1B	Isom Fm.	undivided tuff mbr.	upper	trachydacite	Ursine, NV	38.9383	114.248	Williams et al. (1997)	USGS Map I-2479
ELYS-1G	Isom-type tuff		basal cooling unit	trachydacite	Ely Springs, NV	37.915	114.652	G.J. Axen	Unpub. Map of Gary Axen	1		1
FRSC-6AV	Isom-type tuff			trachydacite	Frisco, UT	38.4486	113.264	Best et al. (1989a)	US Geol. Surv. Map I-1904	1		1		same area as FRSC -3-40-1
PAHRC-1N	Isom-type tuff			trachydacite	Pahroc Spring, NV	37.6728	114.998	Scott et al. (1992)	US Geol. Surv. Open-File Rpt-92-613			1		called tuff of Pahroc Valley
CND-1FC	Isom Fm	lava flow mbr.		andesitic	Condor Canyon, NV	37.835	114.357	G.J. Axen	Unpub. Map of Gary Axen	1				crystalline (devitrified) sample; Chemical analysis in Best et al. (2009)
CND-1FG	Isom Fm	lava flow mbr.		andesitic	Condor Canyon, NV	37.835	114.357	G.J. Axen	Unpub. Map of Gary Axen	1				glassy sample; Chemical analysis Best et al. (2009)
GLE-6-96-1	Isom Fm.	lava flow mbr.		andesitic	Gleason Basin NV	38.2514	114.104	Best et al. (1989b)	US Geol. Surv. Map I-1881	1				lies between Ripgut and Isom tuffs near White Rock Peak; Chemical analysis and age in Best et al. (2009)
FRSC-1-2-5	Isom Fm.	lava flow mbr.		trachydacite	Frisco, UT	38.2817	113.286	Best et al. (1989a)	US Geol. Surv. Map I-1904
GLE-6-100-1	Isom Fm.	lava flow mbr.		trachydacite?	Gleason Basin, NV	38.3297	114.085	Best et al. (1989b)	US Geol. Surv. Map I-1881					tiny outcrop
STM-8-130-2	Isom Fm.	lava flow mbr.		trachydacite	Steamboat Mtn, UT	38.0431	113.832	Best et al. (1987a)	US Geol. Surv. Map I-1795
IA-1	Isom Fm.	lava flow mbr.		andesitic	White Rock Peak, NV	38.27	114.082	Askren et al. (1997)	Best et al. (1989b)	1				between Ripgut and Isom
IA-2	Isom Fm.	lava flow mbr.		andesitic	White Rock Peak, NV	38.27	114.082	Toth (1986)	Best et al. (1989b)	1				between Ripgut and Isom
IA-3	Isom Fm.	lava flow mbr.		andesitic	White Rock Peak, NV	38.27	114.082	Askren et al. (1997)	Best et al. (1989b)	1				between Ripgut and Isom
IA-4	Isom Fm.	lava flow mbr.		andesitic	White Rock Peak, NV	38.27	114.082	Toth (1986)	Best et al. (1989b)	1				between Ripgut and Isom
IA-5	Isom Fm.	lava flow mbr.		andesitic	White Rock Peak, NV	38.27	114.082	Askren et al. (1997)	Best et al. (1989b)	1				between Ripgut and Isom
IA-6	Isom Fm.	lava flow mbr.		andesitic	White Rock Peak, NV	38.27	114.082	Toth (1986)	Best et al. (1989b)	1				between Ripgut and Isom
FRSCPK-3	Kellys Place, andesite of	lava		andesitic	Frisco Peak, UT	38.5339	113.458	Hintze et al. (1984)	US Geol. Surv. Map I-1573	1				33.5 Ma (Hintze et al., 1984); Chemical analysis in Best et al. (2009)
EIGHT-10	Latite lava, Tlf	lava		latitic	Eightmile Spring, UT	37.888	113.939	Best (1987)	US Geol. Surv. Map I-1774	1
EIGHT-11	Latite lava, Tlf	lava		latitic	Eightmile Spring, UT	37.9106	113.947	Best (1987)	US Geol. Surv. Map I-1774	1
MOD-1-61-1	Latite lava, Tlf	lava		latitic	Modena, UT	37.8903	113.933	Best (1987)	US Geol. Surv. Map I-1774	1				Chemical analysis and age in Best et al. (2009)
MOD-1-67-1	Latite lava, Tlf	lava		latitic	Modena, UT	37.871	113.892	Best (1987)	US Geol. Surv. Map I-1774	1				Chemical analysis and age in Best et al. (2009)
PAHRC-1K	Leach Canyon Fm.	Narrows Tuff Mbr.		rhyolite	Pahroc Spring, NV	37.6719	114.997	Scott et al. (1992)	US Geol. Surv. Open-File Rpt-92-613			1
WHRN-1D	Leach Canyon Fm.	Narrows Tuff Mbr.		rhyolite	White River Narrows, NV	37.85	115.019	du Bray and Hurtubise (1994)	US Geol. Surv. Maps I-2282 and I-1041	1		1		basal part
WHRN-1E	Leach Canyon Fm.	Narrows Tuff Mbr.		rhyolite	White River Narrows, NV	37.85	115.019	du Bray and Hurtubise (1994)	US Geol. Surv. Maps I-2282 and I-1041	1				top
WHRN-1F	Leach Canyon Fm.	Narrows Tuff Mbr.		rhyolite	White River Narrows, NV	37.8425	115.027	du Bray and Hurtubise (1994)	US Geol. Surv. Maps I-2282 and I-1041			1	1S
CND-11A	Leach Canyon Fm.	Table Butte Tuff Mbr.		rhyolite	Condor Canyon, NV	37.8578	114.331	G.J. Axen	unpublished map	1				no cooling break wih underlying Narrows Mbr.
CND-11B	Leach Canyon Fm.	Table Butte Tuff Mbr.		rhyolite	Condor Canyon, NV	37.8581	114.33	G.J. Axen	unpublished map	1
CND-11C	Leach Canyon Fm.	Table Butte Tuff Mbr.		rhyolite	Condor Canyon, NV	37.8583	114.329	G.J. Axen	unpublished map	1
CND-1PU	Leach Canyon Fm.	Table Butte Tuff Mbr.		rhyolite	Condor Canyon, NV	37.8564	114.331	G.J. Axen	unpublished map			2		upper part with lithic clasts
CND-1PV	Leach Canyon Fm.	Table Butte Tuff Mbr.		rhyolite	Condor Canyon, NV	37.8564	114.331	G.J. Axen	unpublished map			2	1S	basal vitrophyre
PAHRC-1L	Leach Canyon Fm.	Table Butte Tuff Mbr.		rhyolite	Pahroc Spring, NV	37.6728	114.998	Scott et al. (1992)	US Geol. Surv. Open-File Rpt-92-613
DES-1C	Leach Canyon Fm.	undivided tuff mbr.		rhyolite	Desert Mound, UT	37.6367	113.278		Isochron/West, no. 55, p. 24-27	1				fission track age of 24.2 Ma
PANACASM-2-70-2	Leach Canyon Fm.	undivided tuff mbr.		rhyolite	Panaca Summit, NV	37.75	114.152	Williams et al. (1997)	US Geol. Surv. Map I-2479	1
WHEAT-1L	Leach Canyon Fm.	undivided tuff mbr.		rhyolite	Wheatgrass Spring, NV	37.8278	114.935	Scott et al (1994)	US Geol. Surv. Open-File Rpt-94-175
ALAMO-1C	Leach Canyon Fm.	undivided tuff mbr.		rhyolite	Alamo, NV	37.2528	115.222	Ekren et al. (1971)	US Geol. Surv. Map I-1041	1
ATL-6	Lund Fm.?	tuff mbr.		dacite	Atlanta, NV	38.4686	114.351	Willis et al. (1987)	USGS Map MF-1971					argillic alteration
ATL-7	Lund Fm.?	tuff mbr.		dacite	Atlanta, NV	38.4683	114.355	Willis et al. (1987)	USGS Map MF-1971					propylitic alteration
BRISTOL-1B	Lund Fm.	tuff mbr.		dacite	Bristol Well, NV	38.0731	114.705		US Geol. Surv. Open-File Rpt-95-58
COYOT-1E	Lund Fm.	tuff mbr.		dacite	Coyote Spring, NV	38.0192	114.864	Ekren and Page (1995)	US Geol. Surv. Open-File Rpt-95-550	1	1	1
ELYS-1F	Lund Fm.	tuff mbr.		dacite	Ely Springs, NV	37.9119	114.653	G.J. Axen	Unpub. Map of Gary Axen	1	1	1
FAIRV-1-205-6	Lund Fm.	tuff mbr.		dacite	Bristol Range NE, NV	38.1969	114.609	Best et al. (1998)	Nevada Bur Mines & Geol. Map 114
FAIRV-1-205-7	Lund Fm.	tuff mbr.		dacite	Bristol Range NE, NV	38.2028	114.62	Best et al. (1998)	Nevada Bur Mines & Geol. Map 114
FAIRV-1-207-13	Lund Fm.	tuff mbr.		dacite	Pony Springs, NV	38.2528	114.596	Best et al. (1998)	Nevada Bur Mines & Geol. Map 114
FAIRV-1-207-14	Lund Fm.	tuff mbr.		dacite	Fairview Pk, NV	38.2283	114.639	Best et al. (1998)	Nevada Bur Mines & Geol. Map 114
FAIRV-1-209-1	Lund Fm.	tuff mbr.		dacite	Grassy Mtn., NV	38.2647	114.633	Best et al. (1998)	Nevada Bur Mines & Geol. Map 114
FAIRV-1-209-2	Lund Fm.	tuff mbr.		dacite	Pony Springs, NV	38.2633	114.623	Best et al. (1998)	Nevada Bur Mines & Geol. Map 114
FAIRV-1-209-3	Lund Fm.	tuff mbr.		dacite	Pony Springs, NV	38.2644	114.619	Best et al. (1998)	Nevada Bur Mines & Geol. Map 114		1			vitrophyre
FAIRV-2A	Lund Fm.	tuff mbr.		dacite	Fairview Pk, NV	38.2028	114.647	Best et al. (1998)	Nevada Bur Mines & Geol. Map 114	1	1
FAIRV-2B	Lund Fm.	fallout tuff?		dacite	Fairview Pk, NV	38.2025	114.647	Best et al. (1998)	Nevada Bur Mines & Geol. Map 114	1				very fine ash-fall (?)
FAIRV-2C	Lund Fm.	tuff mbr.		dacite	Fairview Pk, NV	38.2019	114.647	Best et al. (1998)	Nevada Bur Mines & Geol. Map 114	1	1
FAIRV-30	Lund Fm.	tuff mbr.		dacite	Fairview Pk, NV	38.2075	114.643	Best et al. (1998)	Nevada Bur Mines & Geol. Map 114
FAIRV-31	Lund Fm.	tuff mbr.		dacite	Fairview Pk, NV	38.2119	114.641	Best et al. (1998)	Nevada Bur Mines & Geol. Map 114
FAIRV-3-186-3	Lund Fm.	tuff mbr.		dacite	Fairview Pk, NV	38.1933	114.705	Best et al. (1998)	Nevada Bur Mines & Geol. Map 114					lower (?) part of unit
FAIRV-3-188-2	Lund Fm.	tuff mbr.		dacite	Fairview Pk, NV	38.235	114.692	Best et al. (1998)	Nevada Bur Mines & Geol. Map 114
FAIRV-3-188-4	Lund Fm.	tuff mbr.		dacite	Fairview Pk, NV	38.2061	114.686	Best et al. (1998)	Nevada Bur Mines & Geol. Map 114
FAIRV-3-189-1	Lund Fm.	tuff mbr.		dacite	Fairview Pk, NV	38.2292	114.705	Best et al. (1998)	Nevada Bur Mines & Geol. Map 114					upper
FAIRV-3-189-2	Lund Fm.	tuff mbr.		dacite	Fairview Pk, NV	38.2236	114.715	Best et al. (1998)	Nevada Bur Mines & Geol. Map 114					upper
FAIRV-3-191-2	Lund Fm.	tuff mbr.		dacite	Grassy Mtn., NV	38.2631	114.685	Best et al. (1998)	Nevada Bur Mines & Geol. Map 114
FAIRV-3-191-3	Lund Fm.	tuff mbr.		dacite	Grassy Mtn., NV	38.2631	114.683	Best et al. (1998)	Nevada Bur Mines & Geol. Map 114
FAIRV-3-191-4	Lund Fm.	tuff mbr.		dacite	Grassy Mtn., NV	38.2622	114.678	Best et al. (1998)	Nevada Bur Mines & Geol. Map 114
FAIRV-3-191-5B	Lund Fm.	tuff mbr.		dacite	Grassy Mtn., NV	38.2533	114.702	Best et al. (1998)	Nevada Bur Mines & Geol. Map 114
FAIRV-3-197-2	Lund Fm.	tuff mbr.		dacite	Fairview Pk, NV	38.2333	114.673	Best et al. (1998)	Nevada Bur Mines & Geol. Map 114					upper part of unit
FAIRV-3-197-3	Lund Fm.	tuff mbr.		dacite	Fairview Pk, NV	38.2436	114.657	Best et al. (1998)	Nevada Bur Mines & Geol. Map 114
FAIRV-3-200-2	Lund Fm.	tuff mbr.		dacite	Fairview Pk, NV	38.19	114.643	Best et al. (1998)	Nevada Bur Mines & Geol. Map 114
FAIRV-3-200-3	Lund Fm.	tuff mbr.		dacite	Fairview Pk, NV	38.1889	114.644	Best et al. (1998)	Nevada Bur Mines & Geol. Map 114
FAIRV-3-200-4	Lund Fm.	tuff mbr.		dacite	Fairview Pk, NV	38.1989	114.65	Best et al. (1998)	Nevada Bur Mines & Geol. Map 114
FAIRV-3A	Lund Fm.?	tuff mbr.		dacite	Fairview Pk, NV	38.2181	114.681	Best et al. (1998)	Nevada Bur Mines & Geol. Map 114
FAIRV-3B	Lund Fm.?	tuff mbr.		dacite	Fairview Pk, NV	38.2183	114.681	Best et al. (1998)	Nevada Bur Mines & Geol. Map 114
FAIRV-7A	Lund Fm.?	tuff mbr.		dacite	Fairview Pk, NV	38.2172	114.678	Best et al. (1998)	Nevada Bur Mines & Geol. Map 114	1
FOREST-1C	Lund Fm.	tuff mbr.		dacite	Forest Home, NV	38.3178	115.362	Moores et al. (1968)		1	1
FOREST-1X	Lund or Silver King	tuff mbr.		low silica rhyolite	Forest Home, NV	38.32	115.362	Moores et al. (1968)	GSA Bull. v. 79, p. 1703	1
GAP-1E	Lund Fm.	tuff mbr.		dacite	Gap Mountain, NV	38.2767	115.086
HANCSUM-2	Lund Fm.?	tuff mbr.		dacite	Hancock Summit, NV	37.4528	115.367	Ekren et al. (1971)	US Geol. Surv. Map I-1041	1
HOR-11	Lund Fm.	tuff mbr.		dacite	Horse Corral Pass, NV	38.3767	114.392	Willis et al. (1987)	US Geol. Surv. Map MF-1971	1	1	1
LAM-5V	Lund Fm.	tuff mbr.		dacite	Lamerdorf Peak, UT	38.3694	113.528	Abbott et al. (1983)	US Geol. Surv. Map I-1479	1	1
LAM-9-70-1	Lund Fm.	tuff mbr.		dacite	Lamerdorf Peak, UT	38.3592	113.528	Abbott et al. (1983)	US Geol. Surv. Map I-1479
LAM-9-73-1	Lund Fm.	tuff mbr.		dacite	Lamerdorf Peak, UT	38.2778	113.519	Abbott et al. (1983)	US Geol. Surv. Map I-1479					Alunitized
LUND-11-46	Lund Fm.	tuff mbr.		dacite	Lund, UT	38.0244	113.471	Hintze et al. (1994b)	US Geol. Surv. Map I-2361	1				lowest exposure about 46 m above top exposure of px-pl lavas
LUND-11-114	Lund Fm.	tuff mbr.		dacite	Lund, UT	38.025	113.471	Hintze et al. (1994b)	US Geol. Surv. Map I-2361	1				114 m stratigraphically above
LUND-11-168	Lund Fm.	tuff mbr.		dacite	Lund, UT	38.025	113.472	Hintze et al. (1994b)	US Geol. Surv. Map I-2361	1				168 m
LUND-11-229	Lund Fm.	tuff mbr.		dacite	Lund, UT	38.0256	113.472	Hintze et al. (1994b)	US Geol. Surv. Map I-2361	1				229 m
LUND-11-282	Lund Fm.	tuff mbr.		dacite	Lund, UT	38.0261	113.473	Hintze et al. (1994b)	US Geol. Surv. Map I-2361	1				282 m
LUND-11-351	Lund Fm.	tuff mbr.		dacite	Lund, UT	38.0269	113.474	Hintze et al. (1994b)	US Geol. Surv. Map I-2361	1				351 m
LUND-11-419	Lund Fm.	tuff mbr.		dacite	Lund, UT	38.0281	113.474	Hintze et al. (1994b)	US Geol. Surv. Map I-2361					419 m
LUND-11-488	Lund Fm.	tuff mbr.		dacite	Lund, UT	38.0289	113.475	Hintze et al. (1994b)	US Geol. Surv. Map I-2361	1				544 m
LUND-11-549	Lund Fm.	tuff mbr.		dacite	Lund, UT	38.03	113.475	Hintze et al. (1994b)	US Geol. Surv. Map I-2361	1
LUND-11-602	Lund Fm.	tuff mbr.		dacite	Lund, UT	38.0311	113.476	Hintze et al. (1994b)	US Geol. Surv. Map I-2361	1				602 m above base
MARM-1-496-1I	Lund Fm.	tuff mbr.		dacite	Schoolmarm Basin, NV	38.3022	114.43	Willis et al. (1987)	US Geol. Surv. Map MF-1971					inclusion in tuff
MARM-1-496-1V	Lund Fm.	tuff mbr.		dacite	Schoolmarm Basin, NV	38.3022	114.43	Willis et al. (1987)	US Geol. Surv. Map MF-1971					vitrophyre
MARM-1-63-1	Lund Fm.	tuff mbr.		dacite	Schoolmarm Basin, NV	38.3286	114.385	Willis et al. (1987)	US Geol. Surv. Map MF-1971					large quartz phenocrysts
MIN-11	Lund Fm.	tuff mbr.		dacite	Miners Cabin Wash, UT	38.3461	113.917	Best et al. (1987b)	US Geol. Surv. Map I-1796	1	1			very top of unit
MIN-12	Lund Fm.	tuff mbr.		dacite	Miners Cabin Wash, UT	38.3425	113.919	Best et al. (1987b)	US Geol. Surv. Map I-1796	1	1			upper third of unit
MIN-13	Lund Fm.	tuff mbr.		dacite	Miners Cabin Wash, UT	38.3381	113.922	Best et al. (1987b)	US Geol. Surv. Map I-1796	1	1			lower third of unit
MIN-8D	Lund Fm.	tuff mbr.		dacite	Miners Cabin Wash, UT	38.3286	114.385	Best et al. (1987b)	US Geol. Surv. Map I-1796	1	1			devitrified; same area as MIN-8-61-4
MIN-8V	Lund Fm.	tuff mbr.		dacite	Miners Cabin Wash, UT	38.3286	114.385	Best et al. (1987b)	US Geol. Surv. Map I-1796	1	1		1S	vitrophyre; same area as MIN-8-61-4
MIN-8-24-2	Lund Fm.?	tuff mbr.		dacite	Miners Cabin Wash, UT	38.3606	113.951	Best et al. (1987b)	US Geol. Surv. Map I-1796
MIN-8-61-4A	Lund Fm.	tuff mbr.		dacite	Miners Cabin Wash, UT	38.335	113.924	Best et al. (1987b)	US Geol. Surv. Map I-1796					Just above vitrophyre
MIN-8-61-4B	Lund Fm.	tuff mbr.		dacite	Miners Cabin Wash, UT	38.335	113.924	Best et al. (1987b)	US Geol. Surv. Map I-1796	1				15 m above 4A
MINERSV-5	Lund Fm.	tuff mbr.		dacite	Minersville, UT	38.1808	112.871			1	1
MLLR-2V	Lund Fm.	tuff mbr.		dacite	Miller Canyon, NV	38.345	114.219	Best et al. (1989b)	US Geol. Surv. Map I-1881	1	1			vitrophyre
PAHRC-2C	Lund Fm.	tuff mbr.		dacite	Pahroc Spring, NV	37.7083	114.935	Scott et al. (1992)	US Geol. Surv. Open-File Rpt-92-613	1	1	1
PAHRC-2C-18	Lund Fm.	tuff mbr.		dacite	Pahroc Spring, NV	37.7083	114.935	Scott et al. (1992)	US Geol. Surv. Open-File Rpt-92-613	1	1
PAHRC-2C-38	Lund Fm.	tuff mbr.		dacite	Pahroc Spring, NV	37.7083	114.935	Scott et al. (1992)	US Geol. Surv. Open-File Rpt-92-613	1	1
PAHRC-2C-54	Lund Fm.	tuff mbr.		dacite	Pahroc Spring, NV	37.7083	114.935	Scott et al. (1992)	US Geol. Surv. Open-File Rpt-92-613	1	1
PAHRC-2C-74	Lund Fm.	tuff mbr.		dacite	Pahroc Spring, NV	37.7083	114.935	Scott et al. (1992)	US Geol. Surv. Open-File Rpt-92-613	1	1
PONY-8B-1	Lund Fm.	tuff mbr.		dacite	Pony Springs, NV	38.2544	114.613	Best et al. (1998)	NBMG Map 114	1	1
PONY-8B-2	Lund Fm.	tuff mbr.		dacite	Pony Springs, NV	38.2544	114.613	Best et al. (1998)	NBMG Map 114	1	1
PONY-8C	Lund Fm.	tuff mbr.		dacite	Pony Springs, NV	38.2547	114.605	Best et al. (1998)	NBMG Map 114	1	1
PONYS-1-213-1	Lund Fm.	tuff mbr.		dacite	Pony Springs, NV	38.3006	114.598	Best et al. (1998)	Nevada Bur Mines & Geol. Map 114
PONYS-1-214-9	Lund Fm.	tuff mbr.		dacite	Pony Springs, NV	38.2858	114.597	Best et al. (1998)	Nevada Bur Mines & Geol. Map 114
ROSE-1	Lund Fm.	tuff mbr.		dacite	Rose Valley, NV	37.9972	114.337	Best and Williams (1997)	US Geol. Surv. Map GQ-1765	1	1
ROSE-2	Lund Fm.	tuff mbr.		dacite	Rose Valley, NV	37.9933	114.315	Best and Williams (1997)	US Geol. Surv. Map GQ-1765	1	1
ROSE-12	Lund Fm.?	tuff mbr.		dacite	Rose Valley, NV	37.9967	114.267	Best and Williams (1997)	USGS Map GQ-1765
SCHOOL-1-0	Lund Fm.	tuff mbr.		dacite	Schoolmarm Basin, NV	38.295	114.47	Willis et al. (1987)	US Geol. Surv. Map MF-1971	1	1
SCHOOL-1-0225	Lund Fm.	tuff mbr.		dacite	Schoolmarm Basin, NV	38.295	114.47	Willis et al. (1987)	US Geol. Surv. Map MF-1971	1	1
SCHOOL-1-0420	Lund Fm.	tuff mbr.		dacite	Schoolmarm Basin, NV	38.295	114.47	Willis et al. (1987)	US Geol. Surv. Map MF-1971	1	1
SCHOOL-1-0675	Lund Fm.	tuff mbr.		dacite	Schoolmarm Basin, NV	38.295	114.47	Willis et al. (1987)	US Geol. Surv. Map MF-1971	1	1
SCHOOL-1-0965	Lund Fm.	tuff mbr.		dacite	Schoolmarm Basin, NV	38.295	114.47	Willis et al. (1987)	US Geol. Surv. Map MF-1971	1	1
SCHOOL-1-1260	Lund Fm.	tuff mbr.		dacite	Schoolmarm Basin, NV	38.295	114.47	Willis et al. (1987)	US Geol. Surv. Map MF-1971	1	1
SCHOOL-1-1460	Lund Fm.	tuff mbr.		dacite	Schoolmarm Basin, NV	38.295	114.47	Willis et al. (1987)	US Geol. Surv. Map MF-1971	1	1
SCHOOL-1-1730	Lund Fm.	tuff mbr.		dacite	Schoolmarm Basin, NV	38.295	114.47	Willis et al. (1987)	US Geol. Surv. Map MF-1971	1	1
SCHOOL-1-2130	Lund Fm.	tuff mbr.		dacite	Schoolmarm Basin, NV	38.295	114.47	Willis et al. (1987)	US Geol. Surv. Map MF-1971	1	1
SCHOOL-1-2360	Lund Fm.	tuff mbr.		dacite	Schoolmarm Basin, NV	38.3361	114.453	Willis et al. (1987)	US Geol. Surv. Map MF-1971	1	1
TET-2	Lund Fm.	tuff mbr.		dacite	The Tetons, UT	38.1797	113.565	Best et al. (1987c)	US Geol. Surv. Map I-1794	1
WATERNE-1-12m	Lund Fm.	tuff mbr.		dacite	Water Gap NE, NV	38.2297	115.304			1	1			12 m above base; analysis in Maughan (1996)
WATERNE-1-22m	Lund Fm.	tuff mbr.		dacite	Water Gap NE, NV	38.2297	115.304			1	1		1S	22 m above base; analysis in Maughan (1996)
WATERNE-1-34m	Lund Fm.	tuff mbr.		dacite	Water Gap NE, NV	38.2297	115.304			1	1			34 m above base; analysis in Maughan (1996)
WEEP-1B	Lund Fm.	tuff mbr.		dacite	Weepah Spring, NV	37.8958	115.022	du Bray and Hurtubise (1994)	US Geol. Surv. Map MF-1922 and Bull. 2052	1	1	1
WHRN-2A	Lund Fm.	tuff mbr.		dacite	White River Narrows, NV	37.8611	115.019	du Bray and Hurtubise (1994)	US Geol. Surv. Maps I-2282 and I-1041
WRP-12	Lund Fm.	tuff mbr.		dacite	White Rock Peak, NV	38.1311	114.062	Best et al. (1989b)	US Geol. Surv. Map I-1881
WRP-13	Lund Fm.	tuff mbr.		dacite	White Rock Peak, NV	38.1272	114.087	Best et al. (1989b)	US Geol. Surv. Map I-1881
FOREST-1C	Lund Fm.	tuff mbr.	tuff	dacite	Forest Home, NV	38.3178	115.362	Moores et al. (1968)		1	1
FOREST-1CP	Lund Fm.	tuff mbr.	pumice clasts	dacite	Forest Home, NV	38.3178	115.362	Moores et al. (1968)		1
MLLR-1XA	Lund Fm.	tuff mbr.	pumice clasts	dacite	Miller Canyon, NV	38.2544	114.207	Best et al. (1989b)	US Geol. Surv. Map I-1881	1				xenolith in tuff; analysis in Maughan (1996)
MLLR-1XB	Lund Fm.	tuff mbr.	pumice clasts	dacite	Miller Canyon, NV	38.2544	114.207	Best et al. (1989b)	US Geol. Surv. Map I-1881	1				xenolith in tuff; analysis in Maughan (1996)
MLLR-1XC	Lund Fm.	tuff mbr.	pumice clasts	dacite	Miller Canyon, NV	38.2544	114.207	Best et al. (1989b)	US Geol. Surv. Map I-1881	1				xenolith in tuff; analysis in Maughan (1996)
MLLR-1XD	Lund Fm.	tuff mbr.	pumice clasts	dacite	Miller Canyon, NV	38.2544	114.207	Best et al. (1989b)	US Geol. Surv. Map I-1881	1				xenolith in tuff; analysis in Maughan (1996)
MLLR-1M	Lund Fm.	tuff mbr.		dacite	Miller Canyon, NV	38.2544	114.207	Best et al. (1989b)	US Geol. Surv. Map I-1881	1	1			host tuff for xenolithic clasts; same area as MLLR -9-164-1; analysis in Maughan (1996)
MLLR-1VB	Lund Fm.	tuff mbr.	pumice clasts	dacite	Miller Canyon, NV	38.2544	114.207	Best et al. (1989b)	US Geol. Surv. Map I-1881		1			vitrophyre block; same area as MLLR -9-164-1
MLLR-6-65-1A	Lund Fm.	tuff mbr.	pumice clasts	dacite	Miller Canyon, NV	38.2903	114.14	Best et al. (1989b)	US Geol. Surv. Map I-1881	1	1			pumice clasts in tuff; analysis in Maughan (1996)
MLLR-6-65-1PD	Lund Fm.	tuff mbr.	pumice clasts	dacite	Miller Canyon, NV	38.2903	114.14	Best et al. (1989b)	US Geol. Surv. Map I-1881	1	1			pumice clasts in tuff; analysis in Maughan (1996)
MLLR-6-65-1PE	Lund Fm.	tuff mbr.	pumice clasts	dacite	Miller Canyon, NV	38.2903	114.14	Best et al. (1989b)	US Geol. Surv. Map I-1881	1	1			pumice clasts in tuff; analysis in Maughan (1996)
EAGLE-6	Lund Fm.	breccia mbr.		rhyolite?	Eagle Valley, NV	38.0286	114.222	Williams et al. (1997)	USGS Map I-2479					most common rock type in intracaldera breccia unit
URSINE-9	Lund Fm.	breccia mbr.		dacite	Ursine, NV	37.9828	114.201	Williams et al. (1997)	USGS Map I-2479					clasts of Lund tuff in matrix of same?
WRP-6-95-1	Lund Fm.	intrusive lava vent mbr.		dacite	White Rock Peak, NV	38.2325	114.124	Best et al. (1989b)	US Geol. Surv. Map I-1881
WRP-7-70-1	Lund Fm.	intrusive lava vent mbr.		dacite	White Rock Peak, NV	38.2358	114.034	Best et al. (1989b)	US Geol. Surv. Map I-1881; Isochron/West, no. 55, p. 24-27	1				27.6 +/- 2.5 Ma (Kowallis and Best, 1990); flow layered pl + bio +hrnbl vitrophyre
MLLR-9-164-1	Lund Fm.	intrusive porphyry in vent complex		dacite	Miller Canyon, NV	38.2544	114.207	Best et al. (1989b)	US Geol. Surv. Map I-1881	1				27.2 +/- 1.2 Ma zircon fission track age (Best et al., 1989b); vitrophyre block (?); same as MLLR -1; Chemical analysis and age in Best et al. (2009)
FAIRV-3-197-1	Lund Fm.	lava	Chokecherry Spring, lava flow of	andesitic	Fairview Pk, NV	38.2417	114.673	Best et al. (1998)	Nevada Bur Mines & Geol. Map 114	1				See unit description in NBMG Map 114, which includes chem anal;
STM-8-128-1	Lund Fm.	lava	andesite lava flow mbr.	dacite	Steamboat Mtn.., UT	38.0331	113.833	Best et al. (1987a)	US Geol. Surv. Map I-1795	1				Chemical analysis and age in Best et al. (2009)
STM-8-130-1	Lund Fm.	lava	andesite lava flow mbr.	andesite	Steamboat Mtn.., UT	38.045	113.834	Best et al. (1987a)	US Geol. Surv. Map I-1795					flow-layered unit
STM-8-130-4	Lund Fm.	lava	andesite lava flow mbr.	andesite	Steamboat Mtn.., UT	38.0442	113.836	Best et al. (1987a)	US Geol. Surv. Map I-1795	1				Chemical analysis and age in Best et al. (2009)
STM-8-168-1	Lund Fm.	lava	andesite lava flow mbr.	andesite	Steamboat Mtn.., UT	38.0311	113.814	Best et al. (1987a)	US Geol. Surv. Map I-1795
STM-8-169-1A	Lund Fm.	lava	andesite lava flow mbr.	andesite	Steamboat Mtn.., UT	38.03	113.817	Best et al. (1987a)	US Geol. Surv. Map I-1795
STM-8-169-1B	Lund Fm.	lava	andesite lava flow mbr.	andesite	Steamboat Mtn.., UT	38.03	113.817	Best et al. (1987a)	US Geol. Surv. Map I-1795
ATL-1-68-3	Lund Fm.	lava	dacite flow mbr.	dacite	Atlanta, NV	38.4186	114.349	Willis et al. (1987)	US Geol. Surv. Map MF-1971; Isochron/West, no. 55, p. 24-27	1				29.5 +/- 2.6 Ma zircon fission track age (Kowallis and Best, 1990); flow-layered
FAIRV-3-186-2	Lund Fm.	lava		dacite	Fairview Pk, NV	38.1622	114.691	Best et al. (1998)	Nevada Bur Mines & Geol. Map 114
HOR-1-68-4	Lund Fm.	lava		dacite	Horse Corral Pass, NV	38.4356	114.4	Willis et al. (1987)	US Geol. Surv. Map MF-1971					shallow intrusion?
STM-8-169-3	Lund Fm.	lava	andesite lava flow mbr.	andesite	Steamboat Mtn.., UT	38.0444	113.813	Best et al. (1987a)	US Geol. Surv. Map I-1795					zoned hrnbl pheno; between intracaldera Wah Wah and Lund tuffs; near SE margin of White Rock caldera
STM-8-169-3	Lund Fm.	lava	andesite lava flow mbr.	andesite	Steamboat Mtn.., UT	38.0397	113.822	Best et al. (1987a)	US Geol. Surv. Map I-1795	1				Chemical analysis and age in Best et al. (2009); samples -4A and -4B
EAGLE-7	Lund Fm.	lava flow? or dike?		dacite	Eagle Valley, NV	38.0303	114.23	Williams et al. (1997)	USGS Map I-2479					subvertical subtle flow layering
MIL-MOSCOW	Moscow stock	intrusion		granite	Milford, UT	38.3333	113.158	Best et al. (1989a)	US Geol. Surv. Map I-1904					21.6 +/- 2.3 Ma FT age on zircon (Best et al., 1989a); sample approximately located
ELYS-2F	orphan tuff				Ely Springs, NV	37.9625	114.643	G.J. Axen	Unpub. Map of Gary Axen					underlies ELYS -2A
FRSC-3-40-1	orphan tuff				Frisco, UT	38.4486	113.264	Best et al. (1989a)	US Geol. Surv. Map I-1904			1		same as FRSC -6A; similar to Shingle Pass tuff but not
GRASSY-1-213-2	orphan tuff			dacite?	Grassy Mtn., NV	38.3286	114.65	Best et al. (1998)	Nevada Bur Mines & Geol. Map 114			1	2P	called intracaldera Wah Wah Springs on NBMG Map 114; Mark Hudson pmag site B98-6
GRASSY-1-213-4	orphan tuff			dacite?	Grassy Mtn., NV	38.3181	114.644	Best et al. (1998)	Nevada Bur Mines & Geol. Map 114					called intracaldera Wah Wah Springs on NBMG Map 114
GRASSY-1-213-5	orphan tuff			dacite?	Grassy Mtn., NV	38.3256	114.638	Best et al. (1998)	Nevada Bur Mines & Geol. Map 114			1		called intracaldera Wah Wah Springs on NBMG Map 114; also GRM-1
MIN-8-23-2	orphan tuff				Miners Cabin Wash, UT	38.3619	113.95	Best et al. (1987b)	US Geol. Surv. Map I-1796					Wah Wah Springs breccia unit (Twib) at topographic margin of Indian Peak caldera
PANACASM-2-106-1	orphan tuff				Panaca Summit, NV	37.7481	114.149	Williams et al. (1997)	US Geol. Surv. Map I-2479					approximately located; pheno of pl + px + hnbl + bio
PANACASM-2-70-3	orphan tuff				Panaca Summit, NV	37.7819	114.138	Williams et al. (1997)	US Geol. Surv. Map I-2479
WEEP-1A	orphan tuff				Weepah Spring, NV	37.8961	115	du Bray and Hurtubise (1994)	US Geol. Surv. Map MF-1922 and Bull. 2052					probably from Seaman volcanic center
WHEAT-1K	orphan tuff			rhyolite	Wheatgrass Spring, NV	37.8272	114.937	Scott et al (1994)	US Geol. Surv. Open-File Rpt-94-175
WHEAT-3A	orphan tuff				Wheatgrass Spring, NV	37.8647	114.92	Scott et al (1994)	US Geol. Surv. Open-File Rpt-94-175					bedded tuff between Wah Wah Springs and Deadman Springs tuffs; is altered
WHIRL-1	orphan tuff				Whirlwind Valley SW, UT	39.2733	113.133
MIN-8-60-7	orphan tuff or lava			dacite?	Miners Cabin Wash, UT	38.2922	113.914	Best et al. (1987b)	US Geol. Surv. Map I-1796					altered; abundant quartz ~ feldspar; bio>hrnbl
MIN-8-60-8	orphan tuff or lava			andesitic?	Miners Cabin Wash, UT	38.2911	113.911	Best et al. (1987b)	US Geol. Surv. Map I-1796					altered
HIGH-2	Blind Mountain intrusion	in Petroglyph caldera	border facies	granodiorite	Highland Peak, NV	37.9847	114.607	G.J. Axen; Page and Ekren (1995)	unpub. Map; USGS OFR 95-580	1				fine-grained px-bio
HIGH-3	Blind Mountain intrusion	in Petroglyph caldera	main facies	monzonite	Highland Peak, NV	37.9967	114.617	G.J. Axen; Page and Ekren (1995)	unpub. Map; USGS OFR 95-580	1				coarser main facies of pluton
HIGH-4	Blind Mountain intrusion	in Petroglyph caldera		pl-px porphyry diorite	Highland Peak, NV	38.0042	114.614	G.J. Axen; Page and Ekren (1995)	unpub. Map; USGS OFR 95-580	1				Blind Mountain caldera intrusive dike(?)
HIGH-6	Blind Mountain intrusion	in Petroglyph caldera		qtz monz	Highland Peak, NV	38.0031	114.626	G.J. Axen; Page and Ekren (1995)	unpub. Map; USGS OFR 95-580					Blind Mountain caldera intrusion; Axen's qtz. Monzonite; collected ~ 100 m from BRISTOL 3
HIGH-7	Blind Mountain intrusion	in Petroglyph caldera		diorite	Highland Peak, NV	38.0142	114.623	G.J. Axen; Page and Ekren (1995)	unpub. Map; USGS OFR 95-580	1				Blind Mountain caldera intrusion, Axen's granite unit, float from pinnacle
ELYS-1JD	Petroglyph Cliff Ignimbrite	tuff	upper cooling unit	trachydacitic	Ely Springs, NV	37.9189	114.651	G.J. Axen	Unpub. Map of Gary Axen	1		1		samples of devitrified (-1JD) and vitrophyre (-1JV) part of unit; unit has pronounced clastic fabric; some clasts are of eutaxitic tuff
ELYS-1JV	Petroglyph Cliff Ignimbrite	tuff	upper cooling unit	trachydacitic	Ely Springs, NV	37.9189	114.651	G.J. Axen	Unpub. Map of Gary Axen	1		1		samples of devitrified (-1JD) and vitrophyre (-1JV) part of unit; unit has pronounced clastic fabric; some clasts are of eutaxitic tuff
FAIRV-3-201-1	Petroglyph Cliff Ignimbrite	tuff		trachydacitic	Fairview Pk, NV	38.1686	114.677	Best et al. (1998)	Nevada Bur Mines & Geol. Map 114	1
FAIRV-3-201-1BB	Petroglyph Cliff Ignimbrite	tuff		trachydacitic	Fairview Pk, NV	38.1686	114.677	Best et al. (1998)	Nevada Bur Mines & Geol. Map 114	1				black nonvesiculated "magma blobs" in tuff
HIGH-5B	Petroglyph Cliff Ignimbrite	tuff	black blobs in tuff	trachydacitic	Highland Peak, NV	38.0056	114.613	G.J. Axen; Page and Ekren (1995)	unpub. Map; USGS OFR 95-580	1	1			Blind Mountain caldera; black "magma blob" in tuff
HIGH-5G	Petroglyph Cliff Ignimbrite	tuff	clasts in tuff	trachydacitic	Highland Peak, NV	38.0056	114.613	G.J. Axen; Page and Ekren (1995)	unpub. Map; USGS OFR 95-580					Blind Mountain caldera; angular gray clast in tuff
HIGH-5M	Petroglyph Cliff Ignimbrite	tuff		trachydacitic	Highland Peak, NV	38.0056	114.613	G.J. Axen; Page and Ekren (1995)	unpub. Map; USGS OFR 95-580					Blind Mountain caldera; matrix of tuff
PAHRC-2D	Petroglyph Cliff Ignimbrite	tuff		trachydacitic	Pahroc Spring, NV	37.7064	114.936	Scott et al. (1992)	US Geol. Surv. Open-File Rpt-92-613	1		1
PAHRC-2E	Petroglyph Cliff Ignimbrite	tuff		trachydacitic	Pahroc Spring, NV	37.7056	114.937	Scott et al. (1992)	US Geol. Surv. Open-File Rpt-92-613			1		called upper unit
WEEP-1C	Petroglyph Cliff Ignimbrite	tuff		trachydacitic	Weepah Spring, NV	37.8958	115.019	du Bray and Hurtubise (1994)	US Geol. Surv. Map MF-1922 and Bull. 2052	1		1	no Ar release plateau
WEEP-1CM	Petroglyph Cliff Ignimbrite	tuff	clasts in tuff	trachydacitic	Weepah Spring, NV	37.8958	115.019	du Bray and Hurtubise (1994)	US Geol. Surv. Map MF-1922 and Bull. 2052	1				devitrified matrix of clast-rich tuff
WEEP-1CCA	Petroglyph Cliff Ignimbrite	tuff	clasts in tuff	trachydacitic	Weepah Spring, NV	37.8958	115.019	du Bray and Hurtubise (1994)	US Geol. Surv. Map MF-1922 and Bull. 2052	1				indefinite clasts in tuff -1CM
WEEP-1CCB	Petroglyph Cliff Ignimbrite	tuff	clasts in tuff	trachydacitic	Weepah Spring, NV	37.8958	115.019	du Bray and Hurtubise (1994)	US Geol. Surv. Map MF-1922 and Bull. 2052	1				indefinite clasts in tuff -1CM
WEEP-1CBBC	Petroglyph Cliff Ignimbrite	tuff	black blobs in tuff	trachydacitic	Weepah Spring, NV	37.8958	115.019	du Bray and Hurtubise (1994)	USGS Map I-2282	1				irregularly shaped black magma blobs, coarser pheno
WEEP-1CBBF	Petroglyph Cliff Ignimbrite	tuff	black blobs in tuff	trachydacitic	Weepah Spring, NV	37.8958	115.019	du Bray and Hurtubise (1994)	USGS Map I-2282	1				irregularly shaped black magma blobs, finer pheno
WHEAT-2A	Petroglyph Cliff Ignimbrite	tuff		trachydacitic	Wheatgrass Spring, NV	38.8347	114.917	Scott et al (1994)	US Geol. Surv. Open-File Rpt-94-175	1		1
WHEAT-2B	Petroglyph Cliff Ignimbrite	tuff		trachydacitic	Wheatgrass Spring, NV	38.8347	114.918	Scott et al (1994)	US Geol. Surv. Open-File Rpt-94-175	1		1
WHRN-2B	Petroglyph Cliff Ignimbrite	tuff		trachydacitic	White River Narrows, NV	37.8611	115.019	du Bray and Hurtubise (1994)	US Geol. Surv. Maps I-2282 and I-1041	1				clast-free; welded ash-fall(?) tuff
HEBRON-1A	Racer Canyon Tuff	lower		rhyolite	Goldstrike, UT	37.4978	113.887	Rowley et al. (2007)	Utah Geol. Surv. OF Report 510	1		1	1S
HEBRON-1B	Racer Canyon Tuff	upper		rhyolite	Goldstrike, UT	37.5033	113.864	Rowley et al. (2007)	Utah Geol. Surv. OF Report 510	1		1	1S
MOD-1-57-1	Racer Canyon Tuff			rhyolite	Modena, UT	37.7725	113.921	Best (1987)	US Geol. Surv. Map I-1774
MOD-1-57-2	Racer Canyon Tuff			rhyolite	Modena, UT	37.7672	113.921	Best (1987)	US Geol. Surv. Map I-1774
PANACASM-2-104-2	Racer Canyon Tuff	upper		rhyolite	Panaca Summit, NV	37.7839	114.184	Williams et al. (1997)	US Geol. Surv. Map I-2479
PANACASM-2-104-3	Racer Canyon Tuff	upper		rhyolite	Panaca Summit, NV	37.7839	114.183	Williams et al. (1997)	US Geol. Surv. Map I-2479
PANACASM-2-104-4	Racer Canyon Tuff			rhyolite	Panaca Summit, NV	37.7839	114.182	Williams et al. (1997)	US Geol. Surv. Map I-2479			1		vitrophyre
PANACASM-2-104-5	Racer Canyon Tuff	upper		rhyolite	Panaca Summit, NV	37.7811	114.178	Williams et al. (1997)	US Geol. Surv. Map I-2479
PANACASM-2-104-6	Racer Canyon Tuff	upper		rhyolite	Panaca Summit, NV	37.7786	114.172	Williams et al. (1997)	US Geol. Surv. Map I-2479
PANACASM-2-105-2	Racer Canyon Tuff	lower		rhyolite	Panaca Summit, NV	37.7647	114.172	Williams et al. (1997)	US Geol. Surv. Map I-2479
PANACASM-3-239-1	Racer Canyon Tuff	upper		rhyolite	Panaca Summit, NV	37.7936	113.21	Williams et al. (1997)	US Geol. Surv. Map I-2479
PANACASM-3-239-2	Racer Canyon Tuff	lower		rhyolite	Panaca Summit, NV	37.7894	113.211	Williams et al. (1997)	US Geol. Surv. Map I-2479
PANACASM-3-239-6	Racer Canyon Tuff			rhyolite	Panaca Summit, NV	37.7903	113.211	Williams et al. (1997)	US Geol. Surv. Map I-2479			1		upper part of unit
PRO-2-140-1	Racer Canyon Tuff			rhyolite	Prohibition Flat, NV-UT	37.7564	114.101	Williams et al. (1997)	US Geol. Surv. Map I-2479
PRO-3-288-1	Racer Canyon Tuff			rhyolite	Prohibition Flat, NV-UT	38.7631	114.039	Williams et al. (1997)	US Geol. Surv. Map I-2479					approximately located
PRO-3-288-2	Racer Canyon Tuff			rhyolite	Prohibition Flat, NV-UT	37.7533	114.04	Williams et al. (1997)	US Geol. Surv. Map I-2479
PRO-3-288-3	Racer Canyon Tuff			rhyolite	Prohibition Flat, NV-UT	37.7714	114.024	Williams et al. (1997)	US Geol. Surv. Map I-2479
PRO-3-288-4	Racer Canyon Tuff			rhyolite	Prohibition Flat, NV-UT	37.7517	113.999	Williams et al. (1997)	US Geol. Surv. Map I-2479
UVADA-2	Racer Canyon Tuff			rhyolite	Uvada, UT and NV	37.7297	114.028			1		1	1S
DES-1D	Rencher Tuff			andesitic	Desert Mound, UT	37.6644	113.254							abundant cognate clasts
ATL-1-68-1	Ripgut Formation	tuff mbr.		rhyolite	Atlanta, NV	38.4175	114.368	Willis et al. (1987)	USGS Map MF-1971	1	1
ATL-1-69-3B	Ripgut Formation	tuff mbr.		rhyolite	Atlanta, NV	38.4586	114.364	Willis et al. (1987)	US Geol. Surv. Map MF-1971
ATL-1-69-3F	Ripgut Formation	tuff mbr.		rhyolite	Atlanta, NV	38.4586	114.364	Willis et al. (1987)	US Geol. Surv. Map MF-1971					felsic
ATL-1-69-3V	Ripgut Formation	tuff mbr.		rhyolite	Atlanta, NV	38.4586	114.364	Willis et al. (1987)	US Geol. Surv. Map MF-1971		1			vitrophyre
ATL-3	Ripgut Formation	tuff mbr.		rhyolite	Atlanta, NV	38.42	114.365	Willis et al. (1987)	US Geol. Surv. Map MF-1971	1	1		1S	basal
MLLR-6-16-3L	Ripgut Formation	tuff mbr.		rhyolite	Miller Canyon, NV	38.2525	114.19	Best et al. (1989b)	US Geol. Surv. Map I-1881	1				base sample (-3L or -3B); upper part (-3U)
MLLR-6-16-3U	Ripgut Formation	tuff mbr.		rhyolite	Miller Canyon, NV	38.2525	114.19	Best et al. (1989b)	US Geol. Surv. Map I-1881	1				base sample (-3L or -3B); upper part (-3U)
MTWILS-1	Ripgut Formation	tuff mbr.		rhyolite	Mt. Wilson, NV	38.1986	114.399			1				sample has unusually high Rb (489 ppm) for Ripgut
MTWILS-5A	Ripgut Formation	tuff mbr.		rhyolite	Mt. Wilson, NV	38.2181	114.376			1			1P, 1S	middle
MTWILS-5B	Ripgut Formation	tuff mbr.		rhyolite	Mt. Wilson, NV	38.235	114.378			1	1		1P	unusually mafic and pheno-rich
MTWILS-11	Ripgut Formation	tuff mbr.		rhyolite	Mt. Wilson, NV	38.2356	114.382
MTWILS-12	Ripgut Formation	tuff mbr.	fiamme in tuff	rhyolite	Mt. Wilson, NV	38.2392	114.385			1	1
TRC-1-61-2	Ripgut Formation	tuff mbr.		rhyolite	Trail Canyon, NV	38.2539	114.354	Willis et al. (1987)	US Geol. Surv. Map MF-1971	1
TRC-1-63-1	Ripgut Formation	lava flow mbr.		rhyolite	Trail Canyon, NV	38.2906	114.366	Willis et al. (1987)	US Geol. Surv. Map MF-1971					along Mt. Wilson caldera ring fault
TRC-1-505-1	Ripgut Formation	tuff mbr.		rhyolite	Trail Canyon, NV	38.2614	114.354	Willis et al. (1987)	US Geol. Surv. Map MF-1971					contains clasts of Lund tuff
BUCK-8-143-4	Ryan Spring Fm.	Greens Canyon Tuff Mbr.		rhyolite	Buckhorn Spring, UT	38.3381	113.838	Best et al. (1987b)	US Geol. Surv. Map I-1796					upper part of unit; Na and K concentrations perturbed
BUCK-8-143-5A	Ryan Spring Fm.	Greens Canyon Tuff Mbr.		rhyolite	Buckhorn Spring, UT	38.3372	113.839	Best et al. (1987b)	US Geol. Surv. Map I-1796					top of unit; Na and K concentrations perturbed
MIN-8-61-1	Ryan Spring Fm.	Greens Canyon Tuff Mbr.		rhyolite	Miners Cabin Wash, UT	38.3306	113.932	Best et al. (1987b)	US Geol. Surv. Map I-1796		1	1		base
MIN-8-107-1	Ryan Spring Fm.	Greens Canyon Tuff Mbr.		rhyolite	Miners Cabin Wash, UT	38.3064	113.896	Best et al. (1987b)	US Geol. Surv. Map I-1796
MIN-8-107-4	Ryan Spring Fm.	Greens Canyon Tuff Mbr.		rhyolite	Miners Cabin Wash, UT	38.3156	113.874	Best et al. (1987b)	US Geol. Surv. Map I-1796		1
MIN-9D	Ryan Spring Fm.	Greens Canyon Tuff Mbr.		rhyolite	Miners Cabin Wash, UT	38.3331	113.924	Best et al. (1987b)	US Geol. Surv. Map I-1796
MLLR-4V	Ryan Spring Fm.	Greens Canyon Tuff Mbr.		rhyolite	Miller Canyon, NV	38.3033	114.155	Best et al. (1989b)	US Geol. Surv. Map I-1881	1	1			vitrophyre
MLLR-5V	Ryan Spring Fm.	Greens Canyon Tuff Mbr.		rhyolite	Miller Canyon, NV	38.3044	114.161	Best et al. (1989b)	US Geol. Surv. Map I-1881	1				vitrophyre
MLLR-6-64-1	Ryan Spring Fm.	Greens Canyon Tuff Mbr.		rhyolite	Miller Canyon, NV	38.3044	114.156	Best et al. (1989b)	US Geol. Surv. Map I-1881	1	1		2P	base of fourth (?) or fifth (?) cooling unit
ATL-1-512-1	Ryan Spring Fm.	Mackleprang Tuff Mbr.		rhyolite	Atlanta, NV	38.4383	114.327	Willis et al. (1987)	US Geol. Surv. Map MF-1971	1
ATL-4D	Ryan Spring Fm.	Mackleprang Tuff Mbr.		rhyolite	Atlanta, NV	38.4033	114.265	Willis et al. (1987)	US Geol. Surv. Map MF-1971	1			1P
BUCK-8-143-1	Ryan Spring Fm.	Mackleprang Tuff Mbr		rhyolite	Buckhorn Spring, UT	38.3342	113.838	Best et al. (1987b)	US Geol. Surv. Map I-1796		1			30 m from top of unit
BUCK-8-143-2	Ryan Spring Fm.	Mackleprang Tuff Mbr		rhyolite	Buckhorn Spring, UT	38.3361	113.837	Best et al. (1987b)	US Geol. Surv. Map I-1796		1			top third of unit
BUCK-8-143-3	Ryan Spring Fm.	Mackleprang Tuff Mbr		rhyolite	Buckhorn Spring, UT	38.3361	113.837	Best et al. (1987b)	US Geol. Surv. Map I-1796		1			bottom two-thirds of unit
BUCK-8-143-5B	Ryan Spring Fm.	Mackleprang Tuff Mbr.		rhyolite	Buckhorn Spring, UT	38.3372	113.839	Best et al. (1987b)	US Geol. Surv. Map I-1796	1	1			base of unit
ELYS-1E	Ryan Spring Fm.	Mackleprang Tuff Mbr.		rhyolite	Ely Springs, NV	37.9097	114.657	G.J. Axen	Unpub. Map of Gary Axen	1	1	1
MIN-7D	Ryan Spring Fm.	Mackleprang Tuff Mbr.		rhyolite	Miners Cabin Wash, UT	38.3333	113.925	Best et al. (1987b)	US Geol. Surv. Map I-1796				3P
MIN-8-61-2V	Ryan Spring Fm.	Mackleprang Tuff Mbr.		rhyolite	Miners Cabin Wash, UT	38.3331	113.925	Best et al. (1987b)	US Geol. Surv. Map I-1796	1		1
STM-8-132-2	Ryan Spring Fm.			rhyolite	Steamboat Mtn, UT	38.0925	113.837	Best et al. (1987a)	US Geol. Surv. Map I-1795					altered; poor stratigraphic control; map unit is Mackleprang but hand sample looks more like Greens Canyon
STM-8-169-2	Ryan Spring Fm. ?			rhyolite	Steamboat Mtn, UT	38.0425	113.812	Best et al. (1987a)	US Geol. Surv. Map I-1795	1				directly beneath Lund but not typical Mackleprang; is chemically less evolved; a local third cooling unit of formation ??
STM-8-130-3	Ryan Spring Fm.	andesite lava flow mbr.		andesite	Steamboat Mtn.., UT	38.0417	113.822	Best et al. (1987a)	US Geol. Surv. Map I-1795
STM-8-131-1	Ryan Spring Fm.	andesite lava flow mbr.		andesite	Steamboat Mtn.., UT	38.0856	113.849	Best et al. (1987a)	US Geol. Surv. Map I-1795
STM-8-169-0	Ryan Spring Fm.	andesite lava flow mbr.		andesite	Steamboat Mtn.., UT	38.0517	113.802	Best et al. (1987a)	US Geol. Surv. Map I-1795
STM-8-169-3	Ryan Spring Fm.	andesite lava flow mbr.		andesite	Steamboat Mtn.., UT	38.0444	113.813	Best et al. (1987a)	US Geol. Surv. Map I-1795	1				Chemical analysis and age in Best et al. (2009)
STM-8-170-1	Ryan Spring Fm.	andesite lava flow mbr.		andesite	Steamboat Mtn.., UT	38.0653	113.801	Best et al. (1987a)	US Geol. Surv. Map I-1795
STM-8-171-3	Ryan Spring Fm.	andesite lava flow mbr.		andesite	Steamboat Mtn.., UT	38.0758	113.815	Best et al. (1987a)	US Geol. Surv. Map I-1795					six samples of different types
STM-8-171-4	Ryan Spring Fm.	rhyolite lava flow mbr.		rhyolite	Steamboat Mtn.., UT	38.0806	113.8	Best et al. (1987a)	US Geol. Surv. Map I-1795
LUND-12	Sawtooth Peak Fm. ?	tuff mbr.		rhyolite	Lund, UT	38.1147	113.391	Hintze et al. (1994b)	USGS Map I-2361		1			called tuff of Tower Point
MIN-8-60-5	Sawtooth Peak Fm. ?	tuff mbr.		dacite?	Miners Cabin Wash, UT	38.2842	113.897	Best et al. (1987b)	US Geol. Surv. Map I-1796					altered
MIN-8-60-6	Sawtooth Peak Fm. ?	tuff mbr.		rhyolite	Miners Cabin Wash, UT	38.2839	113.91	Best et al. (1987b)	US Geol. Surv. Map I-1796					altered
SWP-6V	Sawtooth Peak Fm.	tuff mbr.		rhyolite	Sawtooth Peak, UT	38.4275	113.854	Best et al. (1987b)	USGS Map I-1796	1	1			basal vitrophyre
SWP-7-1	Sawtooth Peak Fm.	tuff mbr.		rhyolite	Sawtooth Peak, UT	38.4279	113.855	Best et al. (1987b)	USGS Map I-1796	1				10 m from base
SWP-8-2	Sawtooth Peak Fm.	tuff mbr.		rhyolite	Sawtooth Peak, UT	38.428	113.857	Best et al. (1987b)	USGS Map I-1796	1				35 m from base
SWP-9-3	Sawtooth Peak Fm.	tuff mbr.		rhyolite	Sawtooth Peak, UT	38.4284	113.858	Best et al. (1987b)	USGS Map I-1796	1				60 m from base
SWT-1	Sawtooth Peak Fm.	tuff mbr.		rhyolite	Sawtooth Peak, UT	38.4272	113.854	Best et al. (1987b)	US Geol. Surv. Map I-1796 and Prof. Paper 1433A; Isochron/ West, no. 55, p. 24-27		1
SWT-11	Sawtooth Peak Fm.	tuff mbr.		rhyolite	Sawtooth Peak, UT	38.4272	113.854	Best et al. (1987b)	US Geol. Surv. Map I-1796 and Prof. Paper 1433A; Isochron/ West, no. 55, p. 24-27	1	1			33.5 +/- 1.2 Ma K-Ar on biotite (Best and Grant, 1987)
FRSC-3-34-4	Shauntie Hills, andesite of	lava		andesite	Frisco, UT	38.2964	113.254	Best et al. (1989a)	US Geol. Surv. Map I-1904	1				Chemical analysis and age in Best et al. (2009)
FRSC-4-14-1	Shauntie Hills, andesite of	lava		andesite	Frisco, UT	38.2958	113.354	Best et al. (1989a)	US Geol. Surv. Map I-1904	1				Chemical analysis and age in Best et al. (2009)
MIL-1	Shauntie Hills, andesite of	lava		andesite	Milford, UT	38.2947	113.227	Best et al. (1989a)	US Geol. Surv. Map I-1904	1				Chemical analysis and age in Best et al. (2009)
MIL-3-11-3	Shauntie Hills, andesite of	lava		andesite	Milford, UT	38.29	113.183	Best et al. (1989a)	US Geol. Surv. Map I-1904
MIL-3-11-5	Shauntie Hills, andesite of	lava		andesite	Milford, UT	38.2986	113.194	Best et al. (1989a)	US Geol. Surv. Map I-1904	1				Chemical analysis and age in Best et al. (2009)
MIL-3-35-3	Shauntie Hills, andesite of	lava		dacite	Milford, UT	38.3078	113.219	Best et al. (1989a)	US Geol. Surv. Map I-1904	1				Chemical analysis and age in Best et al. (2009)
MIL-3-35-4	Shauntie Hills, andesite of	lava		andesite	Milford, UT	38.3078	113.205	Best et al. (1989a)	US Geol. Surv. Map I-1904
MIL-3-35-6	Shauntie Hills ?, andesite of	lava		andesite	Milford, UT	38.275	113.234	Best et al. (1989a)	US Geol. Surv. Map I-1904	1				Chemical analysis and age in Best et al. (2009)
COYOT-1D	Silver King Tuff			dacite	Coyote Spring, NV	38.0206	114.865	Ekren and Page (1995)	US Geol. Surv. Open-File Rpt-95-550	1	1	1		lower part of unit; analysis in Maughan (1996)
FAIRV-12	Silver King Tuff			dacite	Fairview Pk, NV	38.1978	114.653	Best et al. (1998)	Nevada Bur Mines & Geol. Map 114	1
FAIRV-1-205-3	Silver King Tuff			dacite	Bristol Range NE, NV	38.2061	114.601	Best et al. (1998)	Nevada Bur Mines & Geol. Map 114
FAIRV-1-205-4	Silver King Tuff?			dacite	Bristol Range NE, NV	38.2028	114.598	Best et al. (1998)	Nevada Bur Mines & Geol. Map 114					not typical of unit
FAIRV-1-205-5	Silver King Tuff			dacite	Bristol Range NE, NV	38.1956	114.603	Best et al. (1998)	Nevada Bur Mines & Geol. Map 114
FAIRV-3-158-2	Silver King Tuff			dacite	Fairview Pk, NV	38.2	114.731	Best et al. (1998)	Nevada Bur Mines & Geol. Map 114
FAIRV-3-188-3	Silver King Tuff			dacite	Fairview Pk, NV	38.2097	114.684	Best et al. (1998)	Nevada Bur Mines & Geol. Map 114					lower semi-vitrophyre
FAIRV-3-189-3	Silver King Tuff			dacite	Fairview Pk, NV	38.2181	114.708	Best et al. (1998)	Nevada Bur Mines & Geol. Map 114
FAIRV-3-191-5A	Silver King Tuff			dacite	Grassy Mtn., NV	38.2539	114.703	Best et al. (1998)	Nevada Bur Mines & Geol. Map 114
FAIRV-4	Silver King Tuff			dacite	Fairview Pk, NV	38.2153	114.674	Best et al. (1998)	Nevada Bur Mines & Geol. Map 114	1	1			analysis in Maughan (1996)
FAIRV-5A	Silver King Tuff			dacite	Fairview Pk, NV	38.144	114.73	Best et al. (1998)	Nevada Bur Mines & Geol. Map 114	1	1	1
FAIRV-5B	Silver King Tuff			dacite	Fairview Pk, NV	38.143	114.73	Best et al. (1998)	Nevada Bur Mines & Geol. Map 114	1	1	1
FAIRV-13	Silver King Tuff			dacite	Fairview Pk, NV	38.2347	114.631	Best et al. (1998)	Nevada Bur Mines & Geol. Map 114	1
FAIRV-14	Silver King Tuff			dacite	Fairview Pk, NV	38.2025	114.707	Best et al. (1998)	Nevada Bur Mines & Geol. Map 114	1
FOREST-1B	Silver King Tuff			dacite	Forest Home, NV	38.3197	115.361	Moores et al. (1968)	GSA Bull. v. 79, p. 1703
PONY-8A-1	Silver King Tuff			dacite	Pony Springs, NV	39.993	114.516	Best et al. (1998); Maughan et al. (2002)	NBMG Map 114		1
PONY-8A-2	Silver King Tuff			dacite	Pony Springs, NV	39.993	114.516	Best et al. (1998); Maughan et al. (2002)	NBMG Map 114	1	1
SILVRWL-1E	Silver King Tuff			dacite	Silver King Well, NV	38.32	114.969	Ekren et al. (1971)	US Geol. Surv. Map I-1041	1	1	1	1S	Maughan et al. (2002)
SILVRWL-2A	Silver King Tuff			dacite	Silver King Well, NV	38.3203	114.97	Ekren et al. (1971)	US Geol. Surv. Map I-1041	1	1			Maughan et al. (2002)
SILVRWL-2B	Silver King Tuff			dacite	Silver King Well, NV	38.3203	114.97	Ekren et al. (1971)	US Geol. Surv. Map I-1041	1	1			Maughan et al. (2002)
SILVRWL-2C	Silver King Tuff			dacite	Silver King Well, NV	38.3206	114.97	Ekren et al. (1971)	US Geol. Surv. Map I-1041	1	1			Maughan et al. (2002)
SILVRWL-2D	Silver King Tuff			dacite	Silver King Well, NV	38.3206	114.969	Ekren et al. (1971)	US Geol. Surv. Map I-1041	1	1			Maughan et al. (2002)
SILVRWL-2E	Silver King Tuff			dacite	Silver King Well, NV	38.3208	114.969	Ekren et al. (1971)	US Geol. Surv. Map I-1041	1	1			Maughan et al. (2002)
SILVRWL-2F	Silver King Tuff			dacite	Silver King Well, NV	38.3211	114.969	Ekren et al. (1971)	US Geol. Surv. Map I-1041	1	1			Maughan et al. (2002)
WATERNE-1-6m	Silver King Tuff			dacite	Water Gap NE, NV	38.2631	115.304			1	1			6 m above base of unit; analysis in Maughan et al. (2002)
WATERNE-1-BASE	Silver King Tuff			dacite	Water Gap NE, NV	38.2314	115.306			1	1			Maughan et al. (2002)
WATERNE-1CT	Silver King Tuff			dacite	Water Gap NE, NV	38.2322	115.304				1	1		two-thirds up slope to Monotony; analysis in Maughan (1996)
WATERNE-1CU	Silver King Tuff			dacite	Water Gap NE, NV	38.2322	115.304			1			1S	within a meter of top of cliff; analysis in Maughan (1996)
WATERNE-1CV	Silver King Tuff			dacite	Water Gap NE, NV	38.2322	115.304			1	1	1		vitrophyre; analysis in Maughan (1996)
BAN-8-127-4	Spanish George Spring, dacite of	lava		dacite	Bannion Spring, UT	37.9978	113.857	Best (1987)	US Geol. Surv. Map I-1774	1
MOD-1-71-1	Spanish George Spring?, dacite of	lava		dacite	Modena, UT	37.775	113.901	Best (1987)	US Geol. Surv. Map I-1774					sanidine pheno 1 cm
STM-21	Spanish George Spring, dacite of	lava		dacite	Steamboat Mtn., UT	38.2	114	Best et al. (1987a)	US Geol. Surv. Map I-1795	1				approximate location
FRSC-2-43-24	Squaw Peak, quartz latite of	lava		dacite	Frisco, UT			Best et al. (1989a)	US Geol. Surv. Map I-1904					approximate location
FRSC-2-45-1	Squaw Peak, quartz latite of	lava		dacite	Frisco, UT	38.3889	113.286	Best et al. (1989a)	US Geol. Surv. Map I-1904					vitrophyre with fresh mafic pheno
MIL-3-11-2	Squaw Peak, quartz latite of	lava		dacite	Milford, UT	38.2814	113.169	Best et al. (1989a)	US Geol. Surv. Map I-1904
MIL-3-35-2	Squaw Peak, quartz latite of	lava		dacite	Milford, UT	38.3017	113.226	Best et al. (1989a)	US Geol. Surv. Map I-1904
MIL-3-36-1	Squaw Peak, quartz latite of	lava		dacite	Milford, UT	38.3472	113.224	Best et al. (1989a)	US Geol. Surv. Map I-1904
INDSP-1A	The Gouge Eye, fm. of	A mbr.		rhyolite	Indian Springs Knolls, NV	38.6444	114.46	Loucks et al. (1989)	US Geol. Surv. Map I-1866	1
INDSP-3	The Gouge Eye, fm. of	A mbr.		rhyolite	Indian Springs Knolls, NV	38.6439	114.484	Loucks et al. (1989)	US Geol. Surv. Map I-1866; Isochron/West, no. 55, p. 24-27					30.9 +/- 2.6 Ma FT zircon (Kowallis and Best, 1990); age on basal ash-flow cooling unit
GOUGE-1-133-10	The Gouge Eye, fm. of	B mbr.		rhyolite	The Gouge Eye, NV	38.6061	114.484	Loucks et al. (1989)	US Geol. Surv. Map I-1866		1			pumice
INDSP-1B	The Gouge Eye, fm. of	B mbr.		rhyolite	Indian Springs Knolls, NV	38.6439	114.463	Loucks et al. (1989)	US Geol. Surv. Map I-1866					altered
MTGRFT-1A	The Gouge Eye, fm. of	B mbr.		rhyolite	Mt. Grafton NE, NV	38.6464	114.533	Loucks et al. (1989)	US Geol. Surv. Map I-1866
GOUGE-1-133-6	The Gouge Eye, fm. of	C mbr.	upper	rhyolite	The Gouge Eye, NV	38.6242	114.465	Loucks et al. (1989)	US Geol. Surv. Map I-1866
INDSP-1C	The Gouge Eye, fm. of	C mbr.		rhyolite	Indian Springs Knolls, NV	38.6383	114.453	Loucks et al. (1989)	US Geol. Surv. Map I-1866					altered
MTGRFT-1B	The Gouge Eye, fm. of	C mbr.		rhyolite	Mt. Grafton NE, NV	38.6464	114.532	Loucks et al. (1989)	US Geol. Surv. Map I-1866				1P
GOUGE-1-130-1	The Gouge Eye, fm. of	D mbr.		rhyolite	The Gouge Eye, NV	38.5394	114.458	Loucks et al. (1989)	US Geol. Surv. Map I-1866		1
GOUGEWL-22	The Gouge Eye, fm. of	D mbr.		rhyolite	Gouge Eye Well, NV	38.5936	114.511	Loucks et al. (1989)	US Geol. Surv. Map I-1866				no Ar release plateau
INDSP-1-484-4	The Gouge Eye, fm. of	D mbr.		rhyolite	Indian Springs Knolls, NV	38.6289	114.447	Loucks et al. (1989)	US Geol. Surv. Map I-1866
INDSP-1D	The Gouge Eye, fm. of	D mbr.		rhyolite	Indian Springs Knolls, NV	38.6369	114.447	Loucks et al. (1989)	US Geol. Surv. Map I-1866	1	1
GOUGE-1-485-7	The Gouge Eye, fm. of	lava mbr.	vent facies	rhyolite	The Gouge Eye, NV	38.5961	114.47	Loucks et al. (1989)	US Geol. Surv. Map I-1866	1	1			32.1 +/- 2.6 Ma (Kowallis and Best, 1990)
ANGLE-1L	Wah Wah Springs Fm.	outflow tuff mbr.	tuff	dacite	Angle, UT	38.1636	111.912				1	1		base of unit
ANGLE-1U	Wah Wah Springs Fm.	outflow tuff mbr.	tuff	dacite	Angle, UT	38.1636	111.912					1	no Ar release plateau	top of unit; altered sample
ATL-10	Wah Wah Springs Fm.?	intracaldera mbr.	tuff	dacite	Atlanta, NV	38.455	114.328	Willis et al. (1987)	USGS Map MF-1971					argillically altered veins of apparent Wah Wah tuff (qtz is too sparse to be Lund) between altered clasts of sed rock in intracaldera breccia unit
ATL-33	Wah Wah Springs Fm.	intracaldera mbr.	tuff	dacite	Atlanta, NV	38.4019	114.267	Willis et al. (1987)	US Geol. Surv. Map MF-1971			1	3P
ATL-9	Wah Wah Springs Fm.?	intracaldera mbr.	tuff	dacite	Atlanta, NV	38.4528	114.315	Willis et al. (1987)	USGS Map MF-1971					argillically altered pieces of float of apparent Wah Wah tuff (qtz is too sparse to be Lund) occurring as veins and septa and lenses in intracaldera breccia unit
BAILEY-1BV	Wah Wah Springs Fm.	outflow tuff mbr.	tuff	dacite	Bailey Wash, NV	38.1528	114.763	Ekren et al. (1971)	US Geol. Surv. Map I-1041	1	1
BIGH-1	Wah Wah Springs Fm.	outflow tuff mbr.	tuff	dacite	Big Horseshoe, UT	39.4853	113.671					1
BRN-11	Wah Wah Springs Fm.	outflow tuff mbr.	tuff	dacite	Warm Point, UT	38.8161	113.461	Hintze (1974a)	USGS Map MF-633					very loosely welded base of massive ash-flow tuff (not bedded); ~ 5% angular bleached Pz clasts; no pumice; overlies bedded ss and conglom of Pz pebbles and cobbles
BRN-1V	Wah Wah Springs Fm.	outflow tuff mbr.		dacite	Warm Point, UT	38.8167	113.46	Hintze (1974a)	US Geol. Surv. Map MF-633	1	1			streaked vitrophyre
BRS-5D	Wah Wah Springs Fm.	outflow tuff mbr.	tuff	dacite	Black Rock Summit, NV	38.5661	115.881	Quinlivan et al. (1974)	US Geol. Surv. Map I-804	1		1		devitrified
BRS-5V	Wah Wah Springs Fm.	outflow tuff mbr.	tuff	dacite	Black Rock Summit, NV	38.5661	115.881	Quinlivan et al. (1974)	US Geol. Surv. Map I-804	1	1	1		vitrophyre
BUCK-8-109-1	Wah Wah Springs Fm.	intracaldera mbr.	tuff	dacite	Buckhorn Spring, UT	38.2694	113.868	Best et al. (1987b)	US Geol. Surv. Map I-1796		1
BULLG-2	Wah Wah Springs Fm.	outflow tuff mbr.	tuff	dacite	Bullgrass Knoll, UT	39.0831	113.591			1	1
BULLG-3	Wah Wah Springs Fm.	outflow tuff mbr.	tuff	dacite	Bullgrass Knoll, UT	39.0831	113.591							nonwelded, fine-grained base below vitrophyre,
BULLG-4V	Wah Wah Springs Fm.	outflow tuff mbr.	tuff	dacite	Bullgrass Knoll, UT	39.0831	113.591							basal vitrophyre, lithic rich, 50 m west of BULLG-3
CND-1A	Wah Wah Springs Fm.	outflow tuff mbr.	tuff	dacite	Condor Canyon, NV	37.8325	114.364	G.J. Axen	Unpub. Map of Gary Axen			1
CONGER-1V	Wah Wah Springs Fm.	outflow tuff mbr.	tuff	dacite	Conger Mtn.., UT	39.0833	113.604	Hintze (1974b)	US Geol. Surv. Map MF-634	1	1	1
COW-1	Wah Wah Springs Fm.	outflow tuff mbr.	tuff	dacite	Cow Creek, UT	37.9464	112.109	Rowley et al. (1987)	US Geol. Surv. Map I-1798		1	1	1P
COWBOY-1	Wah Wah Springs Fm.	outflow tuff mbr.	tuff	dacite	Cowboy PassSW, UT	39.3333	113.687		USGS Map I-390		1	1
CRNT-1AV	Wah Wah Springs Fm.	outflow tuff mbr.	tuff	dacite	Currant, NV	38.6033	115.27	Moores et al. (1968)	Geol. Soc. Amer. Bull. , v. 79, p. 1703	1	1	1
CRYSTAL-1-0.05	Wah Wah Springs Fm.	outflow tuff mbr.	bedded tuff	dacite	Crystal Pk, UT	38.7992	113.598	Hintze (1974c)	USGS Map MF-635
CRYSTAL-11	Tunnel Spring Tuff			rhyolite	Crystal Pk, UT	38.7961	113.594	Hintze (1974c)	US Geol. Surv. Map I-2002	1
CRYSTAL-1-1.3	Wah Wah Springs Fm.	outflow tuff mbr.	bedded tuff	dacite	Crystal Pk, UT	38.7992	113.598	Hintze (1974c)	USGS Map MF-635
CRYSTAL-1-13	Wah Wah Springs Fm.	outflow tuff mbr.	bedded tuff	dacite	Crystal Pk, UT	38.7992	113.598	Hintze (1974c)	USGS Map MF-635
CRYSTAL-1-3	Wah Wah Springs Fm.	outflow tuff mbr.	bedded tuff	dacite	Crystal Pk, UT	38.7992	113.598	Hintze (1974c)	USGS Map MF-635
CRYSTAL-2-0.04	Wah Wah Springs Fm.	outflow tuff mbr.	bedded tuff	dacite	Crystal Pk, UT	38.7992	113.598	Hintze (1974c)	USGS Map MF-635
CRYSTAL-2-0.42	Wah Wah Springs Fm.	outflow tuff mbr.	bedded tuff	dacite	Crystal Pk, UT	38.7992	113.598	Hintze (1974c)	USGS Map MF-635
CRYSTAL-2-0.5	Wah Wah Springs Fm.	outflow tuff mbr.	bedded tuff	dacite	Crystal Pk, UT	38.7992	113.598	Hintze (1974c)	USGS Map MF-635
CRYSTAL-2-1.3	Wah Wah Springs Fm.	outflow tuff mbr.		dacite	Crystal Pk, UT	38.7992	113.598	Hintze (1974c)	USGS Map MF-635	1
CRYSTAL-2-3	Wah Wah Springs Fm.	outflow tuff mbr.		dacite	Crystal Pk, UT	38.7992	113.598	Hintze (1974c)	USGS Map MF-635	1
DEADPT-2V	Wah Wah Springs Fm.	outflow tuff mbr.	tuff	dacite	Deadman Point, UT	38.9053	113.823	Hintze (1997)	US Geol. Surv. Map MF-635	1	1
DUTCHJ-1E	Wah Wah Springs Fm.	outflow tuff mbr.	tuff	dacite	Dutch John Mtn., NV	38.4511	114.719	Ekren et al. (1971)	US Geol. Surv. Map I-1041	1		1
ELYS-1DD	Wah Wah Springs Fm.	outflow tuff mbr.	tuff	dacite	Ely Springs, NV	37.9089	114.661	G.J. Axen	Unpub. Map of Gary Axen	1		1		samples of devitrified (-1DD) and vitrophyre (-1DV) part of unit
ELYS-1DV	Wah Wah Springs Fm.	outflow tuff mbr.	tuff	dacite	Ely Springs, NV	37.9089	114.661	G.J. Axen	Unpub. Map of Gary Axen	1	1	1		samples of devitrified (-1DD) and vitrophyre (-1DV) part of unit
FOREST-1AU	Wah Wah Springs Fm.	outflow tuff mbr.	tuff	dacite	Forest Home, NV	38.32	115.361	Moores et al. (1968)	GSA Bull. v. 79, p. 1703		1	1		upper part of unit
FOREST-1AV	Wah Wah Springs Fm.	outflow tuff mbr.	tuff	dacite	Forest Home, NV	38.32	115.361	Moores et al. (1968)	GSA Bull. v. 79, p. 1703	1	1	1		vitrophyre
FRSC-8-0	Wah Wah Springs Fm.	outflow tuff mbr.	tuff	dacite	Frisco, UT	38.4789	113.498	Best et al. (1973)	US Geol. Surv. Map I-1904	1	1	1		eleven samples spaced thru 100m-thick section
FRSC-8-4	Wah Wah Springs Fm.	outflow tuff mbr.	tuff	dacite	Frisco, UT	38.4789	113.498	Best et al. (1973)	US Geol. Surv. Map I-1904	1	1	1		eleven samples spaced thru 100m-thick section
FRSC-8-8	Wah Wah Springs Fm.	outflow tuff mbr.	tuff	dacite	Frisco, UT	38.4789	113.498	Best et al. (1973)	US Geol. Surv. Map I-1904	1	1	1	2P	eleven samples spaced thru 100m-thick section
FRSC-8-16	Wah Wah Springs Fm.	outflow tuff mbr.	tuff	dacite	Frisco, UT	38.4789	113.498	Best et al. (1973)	US Geol. Surv. Map I-1904	1	1	1		eleven samples spaced thru 100m-thick section
FRSC-8-42	Wah Wah Springs Fm.	outflow tuff mbr.	tuff	dacite	Frisco, UT	38.4789	113.498	Best et al. (1973)	US Geol. Surv. Map I-1904	1	1	1		eleven samples spaced thru 100m-thick section
FRSC-8-74	Wah Wah Springs Fm.	outflow tuff mbr.	tuff	dacite	Frisco, UT	38.4789	113.498	Best et al. (1973)	US Geol. Surv. Map I-1904	1	1	1		eleven samples spaced thru 100m-thick section
FRSC-8-100	Wah Wah Springs Fm.	outflow tuff mbr.	tuff	dacite	Frisco, UT	38.4789	113.498	Best et al. (1973)	US Geol. Surv. Map I-1904	1	1	1		eleven samples spaced thru 100m-thick section
FRSCPK-4	Wah Wah Cove, dacite of	lava	Wah Wah Cove, dacite of	dacite	Frisco Peak, UT	38.5056	113.458	Hintze et al. (1984)	US Geol. Surv. Map I-1573
GLE-6-98-9	Wah Wah Springs Fm.	intracaldera mbr.	tuff	dacite	Gleason Basin NV	38.2992	14.1128	Best et al. (1989b)	US Geol. Surv. Map I-1881					vitrophyre block
GNLK-1	Wah Wah Springs Fm.	outflow tuff mbr.	tuff	dacite	Gunlock, UT	37.3625	113.847	Hintze et al. (1994a)	US Geol. Surv. Map I-2427	1	1			altered, several elements perturbed but not Cr
GOUGE-1D	Wah Wah Springs Fm.	outflow tuff mbr.	tuff	dacite	The Gouge Eye, NV	38.5814	114.429	Loucks et al. (1989)	US Geol. Surv. Map I-1866	1				devitrified part of cooling unit
GOUGE-1V	Wah Wah Springs Fm.	outflow tuff mbr.	tuff	dacite	The Gouge Eye, NV	38.5814	114.429	Loucks et al. (1989)	US Geol. Surv. Map I-1866	1	1			vitrophyre
GOUGE-1-488-11	Wah Wah Springs Fm.	outflow tuff mbr.	tuff	dacite	The Gouge Eye, NV	38.5375	114.426	Loucks et al. (1989)	US Geol. Surv. Map I-1866					near base
GOUGE-1-488-2	Wah Wah Springs Fm.	outflow tuff mbr.	tuff	dacite	The Gouge Eye, NV	38.538	114.426	Loucks et al. (1989)	US Geol. Surv. Map I-1866					approximate location
GOUGE-3M	Wah Wah Springs Fm.	outflow tuff mbr.	tuff	dacite	The Gouge Eye, NV	38.5244	114.455	Loucks et al. (1989)	US Geol. Surv. Map I-1866					matrix hosting GOUGE -3P
GOUGEWL-4	Wah Wah Springs Fm.	outflow tuff mbr.	tuff	dacite	Gouge Eye Well, NV	38.602	114.527	Loucks et al. (1989)	USGS Map I-1866					fresh, glassy
HAM-10-10	Wah Wah Springs Fm.	outflow tuff mbr.	tuff	dacite	Hamblin Well, NV	38.4783	114.041	Best et al. (1989b)	USGS Map I-1881	1				14 m above base of cooling unit; approximate location
HAM-10-130	Wah Wah Springs Fm.	outflow tuff mbr.	tuff	dacite	Hamblin Well, NV	38.4778	114.036	Best et al. (1989b)	USGS Map I-1881	1				180 m above base of cooling unit; approximate location
HAM-10-175	Wah Wah Springs Fm.	outflow tuff mbr.	tuff	dacite	Hamblin Well, NV	38.4775	114.035	Best et al. (1989b)	USGS Map I-1881	1				243 m above base of cooling unit; approximate location
HAM-10-2	Wah Wah Springs Fm.	outflow tuff mbr.	tuff	dacite	Hamblin Well, NV	38.4783	114.042	Best et al. (1989b)	US Geol. Surv. Map I-1881	1				3 m above base of cooling unit
HAM-10-245	Wah Wah Springs Fm.	outflow tuff mbr.	tuff	dacite	Hamblin Well, NV	38.4772	114.033	Best et al. (1989b)	US Geol. Surv. Map I-1881	1				340 m above base of cooling unit
HAM-10-40	Wah Wah Springs Fm.	outflow tuff mbr.	tuff	dacite	Hamblin Well, NV	38.4781	114.041	Best et al. (1989b)	USGS Map I-1881	1				56 m above base of cooling unit; approximate location
HAM-10-8	Wah Wah Springs Fm.	outflow tuff mbr.	tuff	dacite	Hamblin Well, NV	38.4783	114.042	Best et al. (1989b)	USGS Map I-1881					11 m above base of cooling unit; approximate location
HAM-10-85	Wah Wah Springs Fm.	outflow tuff mbr.	tuff	dacite	Hamblin Well, NV	38.4781	114.038	Best et al. (1989b)	USGS Map I-1881					118 m above base of cooling unit; approximate location
HAM-5	Wah Wah Springs Fm.	outflow tuff mbr.	tuff	dacite	Hamblin Well, NV	38.4925	114.054	Best et al. (1989b)	US Geol. Surv. Map I-1881	1
HAM-6	Wah Wah Springs Fm.	outflow tuff mbr.	tuff	dacite	Hamblin Well, NV	38.4925	114.054	Best et al. (1989b)	US Geol. Surv. Map I-1881	1
HAM-7-60-1	Wah Wah Springs Fm.	outflow tuff mbr.	tuff	dacite	Hamblin Well, NV	38.4625	114.043	Best et al. (1989b)	US Geol. Surv. Map I-1881					abundant pumice lapilli
HFW-8-153-3A	Wah Wah Springs Fm.	outflow tuff mbr.	tuff	dacite	Halfway Summit, UT	38.5764	113.857	Best and Hintze (1980)	US Geol. Surv. Map MF-1153	1	1			sample of lowest exposure (-3A) and of vitrophyre (-3BV) and overlying devitrified (-3CD)
HFW-8-153-3BV	Wah Wah Springs Fm.	outflow tuff mbr.	tuff	dacite	Halfway Summit, UT	38.5764	113.857	Best and Hintze (1980)	US Geol. Surv. Map MF-1153	1	1			sample of lowest exposure (-3A) and of vitrophyre (-3BV) and overlying devitrified (-3CD)
HFW-8-153-3CD	Wah Wah Springs Fm.	outflow tuff mbr.	tuff	dacite	Halfway Summit, UT	38.5764	113.857	Best and Hintze (1980)	US Geol. Surv. Map MF-1153	1	1			sample of lowest exposure (-3A) and of vitrophyre (-3BV) and overlying devitrified (-3CD)
HFW-8-153-4	Wah Wah Springs Fm.	outflow tuff mbr.	tuff	dacite	Halfway Summit, UT	38.5764	113.857	Best and Hintze (1980)	USGS Map MF-1153					6 m from top of unit above(?) sample HFW-8-153-3C; location uncertain
HOR-1-69-2	Wah Wah Springs Fm.	intracaldera mbr.	tuff	dacite	Horse Corral Pass, NV	38.4528	114.403	Willis et al. (1987)	US Geol. Surv. Map MF-1971
HOR-1-69-4	Wah Wah Springs Fm	intracaldera mbr.	tuff	dacite	Horse Corral Pass, NV	38.4631	114.393	Willis et al. (1987)	US Geol. Surv. Map MF-1971; Isochron/West, no. 55, p. 24-27	1				big biotites in altered rock; looks like Cottonwood Wash but has typical high Cr content of Wah Wah Springs
KNOLL-1C	Wah Wah Springs Fm.	outflow tuff mbr.	tuff	dacite	Knoll Hill, UT	39.1372	113.799					1		vitrophyre
KNOLL-2-1B	Wah Wah Springs Fm.	outflow tuff mbr.	tuff	dacite	Knoll Hill, UT	39.1369	113.799							bottom, fine-grained, small sparse phenocrysts
KNOLL-2-1V	Wah Wah Springs Fm.	outflow tuff mbr.	tuff	dacite	Knoll Hill, UT	39.1369	113.799							vitrophyre
LTTLCRPK-1	Wah Wah Springs Fm.	outflow tuff mbr.	tuff	dacite	Little Creek Peak, UT	37.9431	112.608	Anderson et al. (1987)	Utah Geol. Min. Surv. Map 104			1	no Ar release plateau
LTTLCRPK-2	Wah Wah Springs Fm. ?	outflow tuff mbr. ?	tuff	dacite	Little Creek Peak, UT	37.9636	112.59	Anderson et al. (1987)	Utah Geol. Min. Surv. Map 104					may be Three Creeks tuff
LUND-10-0	Wah Wah Springs Fm.	outflow tuff mbr.	tuff	dacite	Lund, UT	38.0444	113.461	Hintze et al. (1994b)	US Geol. Surv. Map I-2361	1				lowest exposure
LUND-10-3	Wah Wah Springs Fm.	outflow tuff mbr.	tuff	dacite	Lund, UT	38.0447	113.461	Hintze et al. (1994b)	US Geol. Surv. Map I-2361					black vitrophyre; about 8 m thick
LUND-10-10	Wah Wah Springs Fm.	outflow tuff mbr.	tuff	dacite	Lund, UT	38.0447	113.461	Hintze et al. (1994b)	US Geol. Surv. Map I-2361	1				sample 10 m above base of unit
LUND-10-22	Wah Wah Springs Fm.	outflow tuff mbr.	tuff	dacite	Lund, UT	38.0447	113.461	Hintze et al. (1994b)	US Geol. Surv. Map I-2361	1				22 m above a base
LUND-10-44	Wah Wah Springs Fm.	outflow tuff mbr.	tuff	dacite	Lund, UT	38.0447	113.461	Hintze et al. (1994b)	US Geol. Surv. Map I-2361	1				44 m
LUND-10-84	Wah Wah Springs Fm.	outflow tuff mbr.	tuff	dacite	Lund, UT	38.0444	113.462	Hintze et al. (1994b)	US Geol. Surv. Map I-2361	1				84 m
LUND-10-115	Wah Wah Springs Fm.	outflow tuff mbr.	tuff	dacite	Lund, UT	38.0447	113.463	Hintze et al. (1994b)	US Geol. Surv. Map I-2361	1				115 m
LUND-10-L	Wah Wah Springs Fm.	outflow tuff mbr.	tuff	dacite	Lund, UT	38.0447	113.463	Hintze et al. (1994b)	US Geol. Surv. Map I-2361	1				below 1-2 m thick cooling break
LUND-10-U	Wah Wah Springs Fm.	outflow tuff mbr.	tuff	dacite	Lund, UT	38.0447	113.463	Hintze et al. (1994b)	US Geol. Surv. Map I-2361	1				above 1-2 m-thick cooling break at about 140 m above base
LUND-10-162	Wah Wah Springs Fm.	outflow tuff mbr.	tuff	dacite	Lund, UT	38.045	113.464	Hintze et al. (1994b)	US Geol. Surv. Map I-2361	1				162 m
LUND-10-220	Wah Wah Springs Fm.	outflow tuff mbr.	tuff	dacite	Lund, UT	38.0447	113.464	Hintze et al. (1994b)	US Geol. Surv. Map I-2361	1				220 m
LUND-10-230	Wah Wah Springs Fm.	outflow tuff mbr.	tuff	dacite	Lund, UT	38.0447	113.465	Hintze et al. (1994b)	US Geol. Surv. Map I-2361	1				230; abundant cpx
LUND-10-267	Wah Wah Springs Fm.	outflow tuff mbr.	tuff	dacite	Lund, UT	38.0444	113.466	Hintze et al. (1994b)	US Geol. Surv. Map I-2361	1				267 m
LUND-5D	Wah Wah Springs Fm.	outflow tuff mbr.	tuff	dacite	Lund, UT	38.0339	113.454	Hintze et al. (1994b)	US Geol. Surv. Map I-2361					samples of vitrophyre (-5V) and devitrified (-5D)
LUND-5V	Wah Wah Springs Fm.	outflow tuff mbr.	tuff	dacite	Lund, UT	38.0339	113.454	Hintze et al. (1994b)	US Geol. Surv. Map I-2361	1				samples of vitrophyre (-5V) and devitrified (-5D)
MIL-3D	Wah Wah Springs Fm.	outflow tuff mbr.	tuff	dacite	Milford, UT	38.2889	113.199	Best et al. (1989a)	USGS Map I-1904	1				devitrified sample -3D and vitrophyre sample -3V
MIL-3V	Wah Wah Springs Fm.	outflow tuff mbr.	tuff	dacite	Milford, UT	38.2889	113.199	Best et al. (1989a)	USGS Map I-1904	1	1			devitrified sample -3D and vitrophyre sample -3V
MIN-1V	Wah Wah Springs Fm.	intracaldera mbr.	tuff	dacite	Miners Cabin Wash, UT	38.2761	113.883	Best et al. (1987b)	US Geol. Surv. Map I-1796	1	1
MIN-2V	Wah Wah Springs Fm.	intracaldera mbr.	tuff	dacite	Miners Cabin Wash, UT	38.2736	113.884	Best et al. (1987b)	US Geol. Surv. Map I-1796	1
MIN-3D	Wah Wah Springs Fm.	intracaldera mbr.	tuff	dacite	Miners Cabin Wash, UT	38.2717	113.882	Best et al. (1987b)	US Geol. Surv. Map I-1796	1				devitrified
MIN-3V	Wah Wah Springs Fm.	intracaldera mbr.	tuff	dacite	Miners Cabin Wash, UT	38.2717	113.882	Best et al. (1987b)	US Geol. Surv. Map I-1796	1	1			vitrophyre
MIN-4V	Wah Wah Springs Fm.	intracaldera mbr.	tuff	dacite	Miners Cabin Wash, UT	38.2686	113.879	Best et al. (1987b)	US Geol. Surv. Map I-1796	1	1
MIN-5D	Wah Wah Springs Fm.	intracaldera mbr.	tuff	dacite	Miners Cabin Wash, UT	38.2814	113.888	Best et al. (1987b)	US Geol. Surv. Map I-1796	1	1			samples of vitrophyre (-5V) and devitrified (-5D)
MIN-5V	Wah Wah Springs Fm.	intracaldera mbr.	tuff	dacite	Miners Cabin Wash, UT	38.2814	113.888	Best et al. (1987b)	US Geol. Surv. Map I-1796	1	1			samples of vitrophyre (-5V) and devitrified (-5D)
MIN-6V	Wah Wah Springs Fm.	intracaldera mbr.	tuff	dacite	Miners Cabin Wash, UT	38.2506	113.854	Best et al. (1987b)	US Geol. Surv. Map I-1796		1
MIN-8-24-8	Wah Wah Springs Fm.	intracaldera mbr.	breccia	dacite breccia	Miners Cabin Wash, UT	38.3475	113.945	Best et al. (1987b)	USGS Map I-1796					breccia of Cottonwood Wash tuff; Twib unit on USGS Map I-1796
MIN-8-25-2	Wah Wah Springs Fm.?	intracaldera mbr.	tuff	dacite	Miners Cabin Wash, UT	38.32	113.947	Best et al. (1987b)	USGS Map I-1796					looks like (altered) lithic Wah Wah Springs but cannot be--is interbedded with Marsden tuff and debris flows
MIN-8-25-3	Wah Wah Springs Fm.?	intracaldera mbr.	tuff	dacite	Miners Cabin Wash, UT	38.3192	113.952	Best et al. (1987b)	USGS Map I-1796					looks like (altered) lithic Wah Wah Springs but cannot be--is interbedded with Marsden tuff and debris flows
MIN-8-60-2B	Wah Wah Springs Fm.	intracaldera mbr.	tuff	dacite	Miners Cabin Wash, UT	38.2853	113.93	Best et al. (1987b)	US Geol. Surv. Map I-1796		1
MIN-8-60-2C	Wah Wah Springs Fm.	intracaldera mbr.	tuff	dacite	Miners Cabin Wash, UT	38.2853	113.93	Best et al. (1987b)	US Geol. Surv. Map I-1796		1
MIN-8-61-5	Wah Wah Springs Fm.	intracaldera mbr.	breccia	dacite breccia	Miners Cabin Wash, UT	38.33	113.928	Best et al. (1987b)	USGS Map I-1796					breccia of Cottonwood Wash tuff; Twib unit on USGS Map I-1796
MIN-8-63-1	Wah Wah Springs Fm.	outflow tuff mbr.	tuff	dacite	Miners Cabin Wash, UT	38.3369	113.938	Best et al. (1987b)	US Geol. Surv. Map I-1796					amongst caldera breccia; altered
MIN-8-63-2	Wah Wah Springs Fm.	intracaldera mbr.?	tuff	dacite	Miners Cabin Wash, UT	38.3464	113.943	Best et al. (1987b)	US Geol. Surv. Map I-1796					amongst caldera breccia; more biotite relative to hrnbl than most WWS
MIN-8-107-10	Wah Wah Springs Fm.	intracaldera mbr.	breccia	cataclastic breccia	Miners Cabin Wash, UT	38.3022	113.89	Best et al. (1987b)	USGS Map I-1796					cataclastic Wah Wah Springs tuff in contact with Cottonwood Wash tuff; Twib unit
MIN-8-107-11	Wah Wah Springs Fm.	intracaldera mbr.	breccia	cataclastic breccia	Miners Cabin Wash, UT	38.3022	113.89	Best et al. (1987b)	USGS Map I-1796					cataclastic Wah Wah Springs tuff in contact with Cottonwood Wash tuff; Twib unit
MIN-8-107-12	Wah Wah Springs Fm.	intracaldera mbr.	breccia	cataclastic breccia	Miners Cabin Wash, UT	38.3022	113.89	Best et al. (1987b)	USGS Map I-1796					cataclastic Wah Wah Springs tuff in contact with Cottonwood Wash tuff; Twib unit
MIN-8-107-6	Wah Wah Springs Fm.	intracaldera mbr.	breccia	cataclastic breccia	Miners Cabin Wash, UT	38.3044	113.899	Best et al. (1987b)	USGS Map I-1796					several samples of cataclastic surface of Wah Wah Springs tuff in contact with Cottonwood Wash tuff; Twib unit
MIN-8-107-7	Wah Wah Springs Fm.	intracaldera mbr.	breccia	cataclastic breccia	Miners Cabin Wash, UT	38.3025	113.891	Best et al. (1987b)	USGS Map I-1796					cataclastic Wah Wah Springs tuff in contact with Cottonwood Wash tuff; Twib unit
MIN-8-107-8	Wah Wah Springs Fm.	intracaldera mbr.	breccia	dacite breccia	Miners Cabin Wash, UT	38.3047	113.895	Best et al. (1987b)	USGS Map I-1796					breccia of Cottonwood Wash tuff; Twib unit
MIN-8-107-9	Wah Wah Springs Fm.	intracaldera mbr.	breccia	cataclastic breccia	Miners Cabin Wash, UT	38.3025	113.891	Best et al. (1987b)	USGS Map I-1796					sample of cataclasite boulder with rind of Wah Wah Springs tuff
MIN-8-108-1	Wah Wah Springs Fm.	intracaldera mbr.	tuff	dacite	Miners Cabin Wash, UT	38.2619	113.894	Best et al. (1987b)	US Geol. Surv. Map I-1796		1
MIN-8-108-3	Wah Wah Springs Fm.	intracaldera mbr.	tuff	dacite	Miners Cabin Wash, UT	38.2675	113.874	Best et al. (1987b)	US Geol. Surv. Map I-1796					on top of Indian Peak
MIN-8-108-5	Wah Wah Springs Fm.	intracaldera mbr.	tuff	dacite	Miners Cabin Wash, UT	38.2814	113.888	Best et al. (1987b)	US Geol. Surv. Map I-1796
MIN-8-109-2	Wah Wah Springs Fm.	intracaldera mbr.	tuff	dacite	Miners Cabin Wash, UT	38.2539	113.878	Best et al. (1987b)	US Geol. Surv. Map I-1796
MIN-8-109-3	Wah Wah Springs Fm.	intracaldera mbr.	tuff	dacite	Miners Cabin Wash, UT	38.2747	113.875	Best et al. (1987b)	US Geol. Surv. Map I-1796
MIN-8-109-4	Wah Wah Springs Fm.	intracaldera mbr.	tuff	dacite	Miners Cabin Wash, UT	38.2739	113.877	Best et al. (1987b)	US Geol. Surv. Map I-1796
MINERSV-1	Wah Wah Springs Fm.	outflow tuff mbr.	tuff	dacite	Minersville, UT	38.175	112.873					1
MLLR-20	Wah Wah Springs Fm.	intracaldera mbr.	tuff	dacite	Miller Canyon, NV	38.3356	114.207	Best et al. (1989b)	USGS Map I-1881		1			MLLR-20 thru -24 and TRC-5 is strat sequence of samples
MLLR-21	Wah Wah Springs Fm.	intracaldera mbr.	tuff	dacite	Miller Canyon, NV	38.3322	114.217	Best et al. (1989b)	USGS Map I-1881
MLLR-22	Wah Wah Springs Fm.	intracaldera mbr.	tuff	dacite	Miller Canyon, NV	38.3233	114.219	Best et al. (1989b)	USGS Map I-1881
MLLR-23	Wah Wah Springs Fm.	intracaldera mbr.	tuff	dacite	Miller Canyon, NV	38.3158	114.224	Best et al. (1989b)	USGS Map I-1881
MLLR-24	Wah Wah Springs Fm.	intracaldera mbr.	tuff	dacite	Miller Canyon, NV	38.3286	114.234	Best et al. (1989b)	USGS Map I-1881
PAHRC-2B	Wah Wah Springs Fm.	outflow tuff mbr.	tuff	dacite	Pahroc Spring, NV	37.7042	114.932	Scott et al. (1992)	US Geol. Surv. Open-File Rpt-92-613			1		uppermost (-2BU) and vitrophyre (-2BV) samples
PANACASM-9	Wah Wah Springs Fm.	outflow tuff mbr.	tuff	dacite	Panaca Summit, NV	37.76	113.178	Williams et al. (1997)	US Geol. Surv. Map I-2479			1
PANGNW-1AV	Wah Wah Springs Fm.	outflow tuff mbr.	tuff	dacite	Panguitch NW, UT	37.9717	112.435	Anderson and Rowley (1987)	Utah Geol. Min. Surv. Map 103	1	1	1		vitrophyre base
PANGNW-1AD	Wah Wah Springs Fm.	outflow tuff mbr.	tuff	dacite	Panguitch NW, UT	37.9717	112.435	Anderson and Rowley (1987)	Utah Geol. Min. Surv. Map 103					immediately above vitrophyre
PANGNW-1-9	Wah Wah Springs Fm.	outflow tuff mbr.	tuff	dacite	Panguitch NW, UT	37.9717	112.435	Anderson and Rowley (1987)	Utah Geol. Min. Surv. Map 103	1	1			9 m above base of unit
PANGNW-1-22	Wah Wah Springs Fm.	outflow tuff mbr.	tuff	dacite	Panguitch NW, UT	37.9717	112.435	Anderson and Rowley (1987)	Utah Geol. Min. Surv. Map 103	1				22 m above base of unit
PANGNW-1-38	Wah Wah Springs Fm.	outflow tuff mbr.	tuff	dacite	Panguitch NW, UT	37.9717	112.435	Anderson and Rowley (1987)	Utah Geol. Min. Surv. Map 103	1	1	1		38 m above base of unit
PHONO-3	Wah Wah Springs Fm.	outflow tuff mbr.	tuff	dacite	Phonolite Hill, UT	38.1781	112.074	Hintze et al. (2003)	Utah Geol. Surv. Map 195			1	1P
PIERSON-3-78-5	Wah Wah Springs Fm.	outflow tuff mbr.	tuff	dacite	Pierson Summit, NV	38.05	114.258			1	1	1
PIERSON-6	Wah Wah Springs Fm.	intracaldera mbr.	tuff	dacite	Pierson Summit, NV	38.0972	114.33							lithic (intracaldera) tuff surrounding 0.5 x >2 m slab of non-lithic (outflow) Wah Wah Springs tuff
REDR-CS226	Wah Wah Springs Fm.	outflow tuff mbr.	tuff	dacite	Red Ridge, UT	38.6578	112.441	Caskey and Shuey (1975); Hintze et al. (2003)	US Geol. Surv. Map I-1430			1	no Ar release plateau	called Clear Creek Tuff; paleomagnetic direction and age of Wah Wah Springs (Caskey and Shuey, 1975)
REDR-CS227	Wah Wah Springs Fm.	outflow tuff mbr.	tuff	dacite	Red Ridge, UT	38.6703	112.411	Caskey and Shuey (1975); Hintze et al. (2003)				1	1P	called Clear Creek Tuff; paleomagnetic direction, age, and composition of hrnbl pheno are all Wah Wah Springs (Caskey and Shuey, 1975)
ROSE-13	Wah Wah Springs Fm.	outflow tuff mbr.	tuff	dacite	Rose Valley, NV	37.9961	114.272	Best and Williams (1997)	USGS Map GQ-1765
SIGURD-2L	Wah Wah Springs Fm.	outflow tuff mbr.	tuff	dacite	Sigurd, UT	38.8047	111.902				1	1		sample of lower part (-2L) and upper (-2U)
SIGURD-2U	Wah Wah Springs Fm.	outflow tuff mbr.	tuff	dacite	Sigurd, UT	38.8047	111.902				1	1	1P	sample of lower part (-2L) and upper (-2U)
SILVRWL-1D-1	Wah Wah Springs Fm.	outflow tuff mbr.	tuff	dacite	Silver King Well, NV	38.3381	114.97	Ekren et al. (1971)	US Geol. Surv. Map I-1041	1	1	1		1 m above base of unit
SILVRWL-1D-8	Wah Wah Springs Fm.	outflow tuff mbr.	tuff	dacite	Silver King Well, NV	38.3381	114.97	Ekren et al. (1971)	US Geol. Surv. Map I-1041	1	1	1		8 m above base of unit
SILVRWL-1D-20	Wah Wah Springs Fm.	outflow tuff mbr.	tuff	dacite	Silver King Well, NV	38.3381	114.97	Ekren et al. (1971)	US Geol. Surv. Map I-1041	1	1	1		20 m above base of unit
SILVRWL-1D-36	Wah Wah Springs Fm.	outflow tuff mbr.	tuff	dacite	Silver King Well, NV	38.3381	114.97	Ekren et al. (1971)	US Geol. Surv. Map I-1041	1	1	1	1P	36 m above base of unit
SILVRWL-1D-54	Wah Wah Springs Fm.	outflow tuff mbr.	tuff	dacite	Silver King Well, NV	38.3381	114.97	Ekren et al. (1971)	US Geol. Surv. Map I-1041	1	1	1		54 m above base of unit
SILVRWL-1D-82	Wah Wah Springs Fm.	outflow tuff mbr.	tuff	dacite	Silver King Well, NV	38.3381	114.97	Ekren et al. (1971)	US Geol. Surv. Map I-1041	1	1	1		82 m above base of unit
SILVRWL-1D-104	Wah Wah Springs Fm.	outflow tuff mbr.	tuff	dacite	Silver King Well, NV	38.3381	114.97	Ekren et al. (1971)	US Geol. Surv. Map I-1041	1	1	1		104 m above base of unit
SILVRWL-1D-126	Wah Wah Springs Fm.	outflow tuff mbr.	tuff	dacite	Silver King Well, NV	38.3381	114.97	Ekren et al. (1971)	US Geol. Surv. Map I-1041	1	1	1		126 m above base of unit
STM-8-170-2	Wah Wah Springs Fm.	intracaldera mbr.	tuff	dacite	Steamboat Mtn.., UT	38.0836	113.812	Best et al. (1987a)	US Geol. Surv. Map I-1795
STM-8-170-3	Wah Wah Springs Fm.	intracaldera mbr.	tuff	dacite	Steamboat Mtn.., UT	38.0792	113.816	Best et al. (1987a)	US Geol. Surv. Map I-1795
STM-8-171-1	Wah Wah Springs Fm.	intracaldera mbr.	tuff	dacite	Steamboat Mtn.., UT	38.0931	113.815	Best et al. (1987a)	US Geol. Surv. Map I-1795
SWP-4V	Wah Wah Springs Fm?	outflow tuff mbr.?	tuff	dacite	Sawtooth Peak, UT	38.402	113.868	Best et al. (1987b)	USGS Map I-1796
SWP-5V	Wah Wah Springs Fm.	outflow tuff mbr.	tuff	dacite	Sawtooth Peak, UT	38.399	113.868	Best et al. (1987b)	USGS Map I-1796	1
TET-9-41-1	Wah Wah Springs Fm.	intracaldera mbr.	tuff	dacite	The Tetons, UT	38.1844	113.537	Best et al. (1987c)	USGS Map I-1794					contains red nearly aphyric lithic clasts
THREE-1V	Wah Wah Springs Fm.	outflow tuff mbr.	tuff	dacite	The Three Peaks, UT	37.8217	113.222	Mackin and Rowley (1976)	US Geol. Surv. Map GQ-1297	1	1			vitrophyre
TRC-5	Wah Wah Springs Fm.	intracaldera mbr.	tuff	dacite	Trail Canyon, NV	38.3125	114.266	Willis et al. (1987)	USGS Map MF-1971					underlain by MLLR-20 thru MLLR-24 strat sequence of samples
WATERNE-1B	Wah Wah Springs Fm.	outflow tuff mbr.	tuff	dacite	Water Gap NE, NV	38.2278	115.303					1
WEEP-1JL	Wah Wah Springs Fm.	outflow tuff mbr.	tuff	dacite	Weepah Spring, NV	37.9292	115.028	du Bray and Hurtubise (1994)	US Geol. Surv. Map MF-1922 and Bull. 2052	1	1	1		a few m up from base
WEEP-1JU	Wah Wah Springs Fm.	outflow tuff mbr.	tuff	dacite	Weepah Spring, NV	37.9292	115.028	du Bray and Hurtubise (1994)	US Geol. Surv. Map MF-1922 and Bull. 2052	1	1	1		a few m from top
WHEAT-5B	Wah Wah Springs Fm.	outflow tuff mbr.	tuff	rhyo-dacite	Wheatgrass Spring, NV	37.8686	114.944	Scott et al (1994)	US Geol. Surv. Open-File Rpt-94-175	1		1
AJ 94-4	Wah Wah Springs Fm.	Nonpareil ash	fallout tuff	rhyolite	Roundtop, Nebraska	42.8306	103.571							Latitude and Longitude of sample location is approximate; collected by James Swinehart in SE corner Sec 16, T33N, R53W 10-15 cm above base of 1.7 m thick ash; on sample list the unit is indicated as NPA 3 but the sample bag says "NPA2 at Roundtop at pmag site 10-15 cm above base"
GLE-6-98-1X	Wah Wah Springs Fm.	intracaldera mbr.	cognate clasts in tuff	dacite	Gleason Basin NV	38.2992	14.1128	Best et al. (1989b)	US Geol. Surv. Map I-1881	1	1			vitrophyre clast in intracaldera Wah Wah Springs tuff
GLE-6-98-1XA	Wah Wah Springs Fm.	intracaldera mbr.	cognate clasts in tuff	dacite	Gleason Basin NV	38.2992	14.1128	Best et al. (1989b)	US Geol. Surv. Map I-1881	1	1			vitrophyre clast in intracaldera Wah Wah Springs tuff
GLE-6-98-1XB	Wah Wah Springs Fm.	intracaldera mbr.	cognate clasts in tuff	dacite	Gleason Basin NV	38.2992	14.1128	Best et al. (1989b)	US Geol. Surv. Map I-1881	1	1			vitrophyre clast in intracaldera Wah Wah Springs tuff
GLE-6-98-1XC	Wah Wah Springs Fm.	intracaldera mbr.	cognate clasts in tuff	dacite	Gleason Basin NV	38.2992	14.1128	Best et al. (1989b)	US Geol. Surv. Map I-1881	1	1			vitrophyre clast in intracaldera Wah Wah Springs tuff
GLE-6-98-1XD	Wah Wah Springs Fm.	intracaldera mbr.	cognate clasts in tuff	dacite	Gleason Basin NV	38.2992	14.1128	Best et al. (1989b)	US Geol. Surv. Map I-1881	1	1			vitrophyre clast in intracaldera Wah Wah Springs tuff
GLE-6-98-10	Wah Wah Springs Fm.	intracaldera mbr.	cognate clasts in tuff	dacite	Gleason Basin NV	38.2992	14.1128	Best et al. (1989b)	US Geol. Surv. Map I-1881					vitrophyre block
MLLR-6-63-1P	Wah Wah Springs Fm.	intracaldera mbr.	pumice clasts in tuff	dacite	Miller Canyon, NV	38.3144	114.146	Best et al. (1989b)	US Geol. Surv. Map I-1881	1	1
MLLR-6-64-2X	Wah Wah Springs Fm.	intracaldera mbr.	pumice clasts in tuff	dacite	Miller Canyon, NV	38.31	114.151	Best et al. (1989b)	US Geol. Surv. Map I-1881	1	1
GOUGE-3P	Wah Wah Springs Fm.	outflow tuff mbr.	pumice clast	dacite	The Gouge Eye, NV	38.5244	114.455	Loucks et al. (1989)	US Geol. Surv. Map I-1866	1		1		abundant pumice clasts; to as much as football size
GOUGE-3P-12	Wah Wah Springs Fm.	outflow tuff mbr.	pumice clast	dacite	The Gouge Eye, NV	39.5244	115.455	Loucks et al. (1989)	US Geol. Surv. Map I-1867		1	2		abundant pumice clasts; to as much as football size
GOUGE-3P-13	Wah Wah Springs Fm.	outflow tuff mbr.	pumice clast	dacite	The Gouge Eye, NV	38.5244	114.455	Loucks et al. (1989)	US Geol. Surv. Map I-1866		1	1		abundant pumice clasts; to as much as football size
GOUGE-3P-15	Wah Wah Springs Fm.	outflow tuff mbr.	pumice clast	dacite	The Gouge Eye, NV	38.5244	114.455	Loucks et al. (1989)	US Geol. Surv. Map I-1866	1		1		abundant pumice clasts; to as much as football size
HAM-7-58-2	Wah Wah Springs Fm.	outflow tuff mbr.	pumice clasts	dacite	Hamblin Well, NV	38.4731	114.029	Best et al. (1989b)	US Geol. Surv. Map I-1881					upper part of unit has pumice clasts
HAM-9-129-1P	Wah Wah Springs Fm.	outflow tuff mbr.	pumice clasts	dacite	Hamblin Well, NV	38.4036	114.01	Best et al. (1989b)	US Geol. Surv. Map I-1881	1	1			upper part of unit has pumice clasts
HAM-9-129-1	Wah Wah Springs Fm.	outflow tuff mbr.	tuff	dacite	Hamblin Well, NV	38.4036	114.01	Best et al. (1989b)	US Geol. Surv. Map I-1881					upper part of unit has pumice clasts (-1P)
BRN-1PB	Wah Wah Springs Fm.	outflow tuff mbr.	pumice clast	dacite	Warm Point, UT	38.8167	113.46	Hintze (1974a)	USGS Map MF-633	1	1			pumice clasts in tuff
BRN-1PC	Wah Wah Springs Fm.	outflow tuff mbr.	pumice clast	rhyolite	Warm Point, UT	38.8167	113.46	Hintze (1974a)	USGS Map MF-633	1	1			pumice clasts in tuff
BRN-1PD	Wah Wah Springs Fm.	outflow tuff mbr.	pumice clast	dacite	Warm Point, UT	38.8167	113.46	Hintze (1974a)	USGS Map MF-633	1	1			pumice clasts in tuff
BRN-1PE	Wah Wah Springs Fm.	outflow tuff mbr.	pumice clast	dacite	Warm Point, UT	38.8167	113.46	Hintze (1974a)	USGS Map MF-633		1			pumice clasts in tuff
BRN-1PF	Wah Wah Springs Fm.	outflow tuff mbr.	pumice clast	dacite	Warm Point, UT	38.8167	113.46	Hintze (1974a)	USGS Map MF-633		1			pumice clasts in tuff
BRN-1PG	Wah Wah Springs Fm.	outflow tuff mbr.	pumice clast	dacite	Warm Point, UT	38.8167	113.46	Hintze (1974a)	USGS Map MF-633		1			pumice clasts in tuff
BRN-1PH	Wah Wah Springs Fm.	outflow tuff mbr.	pumice clast	dacite	Warm Point, UT	38.8167	113.46	Hintze (1974a)	USGS Map MF-633	1				pumice clasts in tuff
BRN-1PI	Wah Wah Springs Fm.	outflow tuff mbr.	pumice clast	dacite	Warm Point, UT	38.8167	113.46	Hintze (1974a)	USGS Map MF-633	1				pumice clasts in tuff
MIN-8-108-2B	Wah Wah Springs Fm.	intracaldera mbr.	granodiorite porphyry	granodiorite	Miners Cabin Wash, UT	38.2789	113.896	Best et al. (1987b)	US Geol. Surv. Map I-1796					dike in intracaldera Wah Wah Springs tuff
MIN-8-60-3	Wah Wah Springs Fm.	intracaldera mbr.	granodiorite porphyry	granodiorite	Miners Cabin Wash, UT	38.2825	113.919	Best et al. (1987b)	US Geol. Surv. Map I-1796					along Indian Peak caldera ring fracture
MIN-8-110-1	Wah Wah Springs Fm.	intracaldera mbr.	granodiorite porphyry	granodiorite	Miners Cabin Wash, UT	0	0	Best et al. (1987b)	US Geol. Surv. Map I-1796					relatively fresh
MIN-8-60-1	Wah Wah Springs Fm.	intracaldera mbr.	granodiorite porphyry	granodiorite	Miners Cabin Wash, UT	38.2867	113.926	Best et al. (1987b)	US Geol. Surv. Map I-1796					intrusive into Cambrian
MIN-8-60-2A	Wah Wah Springs Fm.	intracaldera mbr.	granodiorite porphyry	granodiorite	Miners Cabin Wash, UT	38.2853	113.93	Best et al. (1987b)	US Geol. Surv. Map I-1796	1	1
BUCK-8-140-2	Wah Wah Springs	lava flow mbr.		andesite	Buckhorn Spring, UT	38.272	113.862	Best et al. (1987b)	USGS Map I-1796	1
FAIRV-1-207-3B	Statigraphically unassigned	dike		rhyolite	Fairview Pk, NV	38.2308	114.631	Best et al. (1998)	Nevada Bur Mines & Geol. Map 114	1				aphyric; subtle flow layers
MIL-2	Statigraphically unassigned	dike		mafic	Milford, UT	38.4219	113.108	Best et al. (1989a)	US Geol. Surv. Map I-1904
PIO-22	Statigraphically unassigned	dike		silicic	Pioche, NV	37.9228	114.455	Park et al. (1958)	USGS Map MF-136					float of altered Yuba dike in gulley
LAM-9-74-11	Statigraphically unassigned	dike or plug		mafic	Lamerdorf Peak, UT	38.2644	113.512	Abbott et al. (1983)	US Geol. Surv. Map I-1479					tiny exposure
FAIRV-3-203-2	Statigraphically unassigned	intrusion		granite porphyry	Fairview Pk, NV	38.1442	114.662	Best et al. (1998)	Nevada Bur Mines & Geol. Map 114				1B	30.04 +/- 0.07 Ma 40Ar/39Ar on biotite using 28.201 Ma for the age of the Fish Canyon tuff
PIO-20	Statigraphically unassigned	intrusion		granodiorite?	Pioche, NV	37.9475	114.496	Park et al. (1958)	USGS Map MF-136					variably altered float of intrusion west of Ely Valley Mine
PIO-21	Statigraphically unassigned	intrusion		granodiorite?	Pioche, NV	37.9481	114.497	Park et al. (1958)	USGS Map MF-136					variably altered float of intrusion west of Ely Valley Mine
PIO-23	Statigraphically unassigned	intrusion		diorite?	Pioche, NV	37.9256	114.455	Park et al. (1958)	USGS Map MF-136					altered pieces on top of a dump in large complex of dumps
CHIEF-1LL	Statigraphically unassigned	lava			Chief Mountain, NV	37.759	114.593	Rowley et al. (1994)	Unpub. Map of K. Burke & G. Axen
CHIEF-1LU	Statigraphically unassigned	lava		basaltic andesite	Chief Mountain, NV	37.759	114.593	Rowley et al. (1994)	Unpub. Map of K. Burke & G. Axen	1				Chemical analysis and age in Best et al. (2009) where sample is labeled CHIEFLU
ELYS-3	Statigraphically unassigned	lava			Ely Springs, NV	37.9731	114.686	G.J. Axen	Unpub. Map of Gary Axen
FAIRV-3-200-1	Statigraphically unassigned	lava		rhyolite	Fairview Pk, NV	38.1814	114.623	Best et al. (1998)	Nevada Bur Mines & Geol. Map 114					float of flow-layered; < 5% pl + sanid + qtz + cpx
UVADA-1	Statigraphically unassigned	lava		andesite	Uvada, UT and NV	37.746	114.121			1				Chemical analysis and age in Best et al. (2009)
BAILEY-1A	Statigraphically unassigned	lava		andesite	Bailey Wash, NV	38.1528	114.763	Ekren et al. (1971)	US Geol. Surv. Map I-1041	1				large plag and zoned hrnbl pheno
BERYL-1	Statigraphically unassigned	lava		andesite	Beryl Junction, UT	37.635	113.719			1				Chemical analysis and age in Best et al. (2009)
BEVR-1	Statigraphically unassigned	lava		basaltic trachyandesite	Beaver, UT	38.265	112.583			1				23.2 Ma (Best et al., 1980); Chemical analysis Best et al. (2009)
BRISTOL-1A	Statigraphically unassigned	lava		andesite	Bristol Well, NV	38.073	114.705		US Geol. Surv. Open-File Rpt-95-58	1				Chemical analysis and age in Best et al. (2009)
BRN-3	Statigraphically unassigned	lava		basaltic and	Warm Point, UT	38.8389	113.474	Hintze (1974a)	USGS Map MF-633	1				lava flow between Cottonwood Wash and Wah Wah Springs tuffs; Chemical analysis and age in Best et al. (2009)
CHIEF-1EL	Statigraphically unassigned	lava		andesite	Chief Mountain, NV	37.753	114.603	Rowley et al. (1994)	Unpub. Map of K. Burke & G. Axen	1				Chemical analysis and age in Best et al. (2009)
CHIEF-1EU	Statigraphically unassigned	lava		dacite	Chief Mountain, NV	37.752	114.605	Rowley et al. (1994)	Unpub. Map of K. Burke & G. Axen	1				Chemical analysis and age in Best et al. (2009) where sample is labeled CHIEFEU
CND-1K	Statigraphically unassigned	lava		andesite?	Condor Canyon, NV	37.8375	114.353	G.J. Axen	Unpub. Map of Gary Axen	1				approximate location; hornblende pheno
CND-2	Statigraphically unassigned	lava			Condor Canyon, NV	37.8208	114.307	G.J. Axen	Unpub. Map of Gary Axen
DODG-1	Statigraphically unassigned	lava		andesite	Dodge Spring, UT	37.3	114.042		US Geol. Surv. Map GQ-1721	1				clast in Little Creek Breccia; Chemical analysis and age in Best et al. (2009)
ELYS-1H	Statigraphically unassigned	lava		dacite	Ely Springs, NV	37.917	114.653	G.J. Axen	Unpub. Map of Gary Axen	1				Chemical analysis and age in Best et al. (2009)
ELYS-2A	Statigraphically unassigned	lava	Below Bald Hills mbr.	andesite	Ely Springs, NV	37.9625	114.643	G.J. Axen	Unpub. Map of Gary Axen	1				Chemical analysis and age in Best et al. (2009)
ENTER-1	Statigraphically unassigned	lava		andesite	Enterprise, UT	37.542	113.681	Blank (1993)	USGS OF Report 93-203	1				Chemical analysis and age in Best et al. (2009)
FERBER-1	Statigraphically unassigned	lava		andesite	Ferber Peak NW, NV	40.132	114.219			1				Chemical analysis and age in Best et al. (2009)
FRSCPK-2	Statigraphically unassigned	lava		basaltic andesite	Frisco Peak, UT	38.725	113.342	Hintze et al. (1984)	US Geol. Surv. Map I-1573	1				same flow as BROWN KNOLL-1;Chemical analysis and age in Best et al. (2009)
FRSC-WAH67	Statigraphically unassigned	lava		mafic	Frisco, UT	38.4694	113.461		US Geol. Surv. Map I-1904
HUSKY-10-13	Statigraphically unassigned	lava	well cuttings	rhyolite	Pine Valley Hardpan South, UT	38.545	113.701			1				perlitic lava in Husky Federal 10-13 drill hole; beneath Needles Range tuffs and above Paleozoic rocks
MIN-8-23-1	Statigraphically unassigned	lava		dacite	Miners Cabin Wash, UT	38.3675	113.935	Best et al. (1987b)	USGS Map I-1796	1				"Wall andesite" lava flow between Cottonwood Wash and Wah Wah Springs tuffs along topo rim of Indian Peak caldera; Chemical analysis and age in Best et al. (2009)
MIN-8-23-4	Statigraphically unassigned	lava		andesite	Miners Cabin Wash, UT	38.3686	113.938	Best et al. (1987b)	USGS Map I-1796	1				"Wall andesite" lava flow between Cottonwood Wash and Wah Wah Springs tuffs along topo rim of Indian Peak caldera; Chemical analysis and age in Best et al. (2009)
MIN-8-24-1	Statigraphically unassigned	lava		andesitic?	Miners Cabin Wash, UT	38.3628	113.946	Best et al. (1987b)	US Geol. Surv. Map I-1796					clasts(?) flows(?) within Indian Peak intracaldera breccia unit
MIN-8-24-3	Statigraphically unassigned	lava		andesitic?	Miners Cabin Wash, UT	38.3589	113.954	Best et al. (1987b)	US Geol. Surv. Map I-1796					clasts(?) flows(?) within Indian Peak intracaldera breccia unit
MIN-8-24-5	Statigraphically unassigned	lava		andesitic?	Miners Cabin Wash, UT	38.3522	113.951	Best et al. (1987b)	US Geol. Surv. Map I-1796					clasts(?) flows(?) within Indian Peak intracaldera breccia unit
MOD-1-59-1	Statigraphically unassigned	lava	hornblende-phyric	andesite?	Modena, UT	37.8344	113.939	Best (1987)	US Geol. Surv. Map I-1774					altered
MOSEY-1A	Statigraphically unassigned	lava			Mosey Mtn., NV	37.7133	114.265
PAHRC-1F	Statigraphically unassigned	lava		andesite	Pahroc Spring, NV	37.676	114.994	Scott et al. (1992)	US Geol. Surv. Open-File Rpt-92-613
PANACASM-2-105-1	Statigraphically unassigned	lava		latite	Panaca Summit, NV	37.7614	114.183	Williams et al. (1997)	US Geol. Surv. Map I-2479					altered; unit Tlf
PANACASM-2-70-1	Statigraphically unassigned	lava		latite	Panaca Summit, NV	37.7619	114.134	Williams et al. (1997)	US Geol. Surv. Map I-2479					unit Tlf
PANACASM-3-239-3	Statigraphically unassigned	lava		andesite	Panaca Summit, NV	37.7867	113.221	Williams et al. (1997)	US Geol. Surv. Map I-2479					called lava flows of Ninemile Rocks
PIERSON-1	Statigraphically unassigned	lava		andesite	Pierson Summit, NV	38.119	114.318
PIERSON-2	Statigraphically unassigned	lava		andesite	Pierson Summit, NV	38.075	114.293							18.2 +/- 0.6 Ma K-Ar whole rock (McKee et al. 1993)
PIERSON-3-78-1	Statigraphically unassigned	lava		andesite	Pierson Summit, NV	38.0522	114.252
PIERSON-3-78-2	Statigraphically unassigned	lava		basalt	Pierson Summit, NV	38.05	114.249
PIERSON-3-78-3	Statigraphically unassigned	lava			Pierson Summit, NV	38.0492	114.249
PIERSON-3-78-4	Statigraphically unassigned	lava			Pierson Summit, NV	38.0494	114.25
ROSE-10	Statigraphically unassigned	lava		dacite	Rose Valley, NV	37.9903	114.271	Best and Williams (1997)	USGS Map GQ-1765	1				unit Ta on ; White Rock caldera ring fault lava?
ROSE-11	Statigraphically unassigned	lava			Rose Valley, NV	37.9986	114.267	Best and Williams (1997)	USGS Map GQ-1765	1				hrnbld porphyritic lava(?) not shown on USGS Map GQ-1765; White Rock caldera ring fault lava?
SHNG-1A	Statigraphically unassigned	lava			Shingle Pass, NV	38.55	114.933	Ekren et al. (1971)	US Geol. Surv. Map I-1041
WAHWAHSM-1	Statigraphically unassigned	lava		andesite	Wah Wah Summit, UT	38.5	113.5	Hintze (1974d)	USGS Map MF-637
WEEP-1H	Statigraphically unassigned	lava		andesite	Weepah Spring, NV	37.896	115.022	du Bray and Hurtubise (1994)	US Geol. Surv. Map MF-1922 and Bull. 2052
WHEAT-1B	Statigraphically unassigned	lava		andesite	Wheatgrass Spring, NV	37.837	114.935	Scott et al (1994)	US Geol. Surv. Open-File Rpt-94-175	1
WHRN-3.126-430	Statigraphically unassigned	lava		basaltic andesite	White River Narrows, NV	37.784	115.033	du Bray and Hurtubise (1994)	US Geol. Surv. Maps I-2282 and I-1041					18.2 +/- 0.5 Ma K-Ar whole rock (McKee et al., 1993)
WHRN-3.126-431	Statigraphically unassigned	lava		basaltic andesite	White River Narrows, NV	37.786	115.033	du Bray and Hurtubise (1994)	US Geol. Surv. Maps I-2282 and I-1041
WHROCCR-1A	Statigraphically unassigned	lava			White Rcok Creek, NV	38.9258	114.839
WHROCCR-1C	Statigraphically unassigned	lava			White Rcok Creek, NV	38.9292	114.839
BEAVER-1A	Statigraphically unassigned	lava		dacite	Beaver Lake Mtns., UT	38.59	113.172
BEAVER-1B	Statigraphically unassigned	lava		andesite	Beaver Lake Mtns., UT	38.59	113.172
DEAD-2	Statigraphically unassigned	lava		basaltic andesite	Deadman Spring, NV	37.877	114.892	Scott et al. (1995)	US Geol. Surv. Open-File Rpt 95-94	1				Chemical analysis and age in Best et al. (2009)
DEAD-3.126-429	Statigraphically unassigned	lava		basaltic andesite	Deadman Spring, NV	37.922	114.961	Scott et al. (1995)	US Geol. Surv. Open-File Rpt 95-94	1				Chemical analysis and age in Best et al. (2009); Wanda Taylor sample
DEAD-4.139-660	Statigraphically unassigned	lava		andesite	Deadman Spring, NV	37.903	114.955	Scott et al. (1995)	US Geol. Surv. Open-File Rpt 95-94	1				Chemical analysis and age in Best et al. (2009); Wanda Taylor sample
PANACASM-2-106-2	Statigraphically unassigned	porphyry		granitic	Panaca Summit, NV	37.755	114.162	Williams et al. (1997)	US Geol. Surv. Map I-2479
PANACASM-3-240-1	Statigraphically unassigned	porphyry		granitic	Panaca Summit, NV	37.7683	113.206	Williams et al. (1997)	US Geol. Surv. Map I-2479
Note: At the end of sample labels, D = devitrified, V = vitrophyre, L = lower, U = upper
