# Supplementary material
Source: publisher figshare collection journal article supplement (https://gsapubs.figshare.com/ndownloader/files/22399260)
Supplement: Supplementary file 1 [file 22399260 › TableRefs.pdf]

## Supplementary Document 7

### REFERENCES CITED IN SUPPLEMENTARY TABLES 1, 2, 3, and 4

- Abbott, J.T., Best, M.G., and Morris, H.T., 1983, Geologic map of the Pine Grove-Blawn Mountain area, Beaver County, Utah: U.S. Geological Survey Miscellaneous Investigations Series Map I-1479.
- Anderson, J.J., 1986, Geologic map of the Fremont Pass quadrangle, Iron and Garfield Counties, Utah: Utah Geological and Mineral Survey Map 81.
- Anderson, J.J. and Rowley, P.D., 1986, Geologic map of the Circleville quadrangle, Beaver, Piute, Iron, and Garfield Counties, Utah: Utah Geological and Mineral Survey Map 86.
- Anderson, J.J. and Rowley, P.D., 1987, Geologic map of the Panguitch NW quadrangle, Iron, and Garfield Counties, Utah: Utah Geological and Mineral Survey Map 103.
- Anderson, J.J., Rowley, P.D., Fleck, R.J., and Nairn, A.E.M., 1975, Cenozoic geology of the southwestern High Plateaus of Utah: Geological Society of America Special Paper 160.
- Anderson, J.J., Iivari, T.A., and Rowley, P.D., 1987, Geologic map of the Little Creek Peak quadrangle, Garfield and Iron Counties, Utah: Utah Geological Survey Map 104.
- Anderson, J.J., Rowley, P.D., Blackman, J.T., Mehnert, H.H., and Grant, T.C., 1990a, Geologic map of the Circleville Canyon area, southern Tushar Mountains, and northern Markagunt Plateau, Beaver, Garfield, Iron, and Piute Counties, Utah: U.S. Geological Survey Miscellaneous Investigation Series Map I-2000.
- Anderson, J.J., Rowley, P.D., Machette, M.N., Decatur, S.H., and Mehnert, H.H., 1990b, Geologic map of the Nevershine Hollow area, eastern Black Mountains, southern Tushar Mountains, and northern Markagunt Plateau, Beaver and Iron Counties, Utah: U.S. Geological Survey Miscellaneous Investigation Series Map I-1999.
- Anderson, R.E. and Hintze, L.F., 1993, Geologic map of the Dodge Spring quadrangle, Washington County, Utah and Lincoln County, Utah: U.S. Geological Survey Geologic Quadrangle Map GQ-1721.
- Averitt, P., 1962, Geology and coal resources of the Cedar Mountain quadrangle, Iron County, Utah: U.S. Geological Survey Professional Paper 389.
- Averitt, P., 1967, Geologic map of the Kanarraville quadrangle, Iron County, Utah: U.S. Geological Survey Geologic Quadrangle Map GQ-1295.
- Averitt, P. and Threet, R.L., 1973, Geologic map of the Cedar City quadrangle, Iron County, Utah: U.S. Geological Survey Geologic Quadrangle Map GQ-1120.
- Barnes, H., Ekren, E.B., Rodgers, C.L., and Hedlund, D.C., 1982, Geologic and tectonic maps of the Mercury quadrangle, Nye and Clark Counties, Nevada: U.S. Geological Survey Miscellaneous Investigations Map I-1197.
- Barr, D.L., 1993, Time, space, and composition patterns of middle Cenozoic mafic to intermediate composition lava flows of the Great Basin, western U.S.A. [M.S. thesis]: Provo, Utah, Brigham Young University, 87 p.
- Best, M.G., 1987, Geologic map and sections of the area between Hamlin Valley and Escalante Desert, Iron County, Utah: U.S. Geological Survey Miscellaneous Investigations Series Map I-1774.

- Best, M.G., and Grant, S.K., 1987, Oligocene and Miocene volcanic rocks in the central Pioche-Marysville igneous belt, western Utah and eastern Nevada: U.S. Geological Survey Professional Paper 1433-A, 28 p.
- Best, M.G. and Hintze, L.F., 1980, Geologic map of the Halfway Summit quadrangle, Millard and Beaver Counties, Utah: U.S. Geological Survey Miscellaneous Field Studies Map MF-1153.
- Best, M.G. and Williams, V.S., 1997, Geologic map of the Rose Valley quadrangle, Lincoln County, Nevada: U.S. Geological Survey Geologic Quadrangle Map GQ-1765.
- Best, M.G., Shuey, R.T., Caskey, C.F., and Grant, S.K., 1973, Stratigraphic relations of members of the Needles Range Formation at type localities in southwestern Utah: Geological Society of America Bulletin, v. 84, p. 3269-3278.
- Best, M.G., McKee, E.H., and Damon, P.E., 1980, Space-time-composition patterns of late Cenozoic mafic volcanism, southwestern Utah and adjoining areas: American Journal of Science, v. 280, p. 1035-1050.
- Best, M.G., Grant, S.K., Hintze, L.F., Cleary, J.G., Hutsinpillar, A., and Saunders, D.M., 1987a, Geologic map of the Indian Peak (southern Needle) Range, Beaver and Iron Counties, Utah: U.S. Geological Survey Miscellaneous Investigation Series Map I-1795.
- Best, M.G., Hintze, L.F., and Holmes, R.D., 1987b, Geologic map of the southern Mountain Home and northern Indian Peak Ranges (central Needle Range), Beaver County, Utah: U.S. Geological Survey Miscellaneous Investigation Series Map I-1796.
- Best, M.G., Mehnert, H.H., Keith, J.D., and Naeser, C.W., 1987c, Miocene magmatism and tectonism in and near the southern Wah Wah Mountains, southwestern Utah: U.S. Geological Survey Professional Paper 1433-B, 19 p.
- Best, M.G., Morris, H.T., Kopf, R.W., and Keith, J.D., 1987d, Geologic map of the southern Pine Valley area, Beaver and Iron Counties, Utah: U.S. Geological Survey Miscellaneous Investigations Series Map I-1794.
- Best, M.G., Lemmon, D.M., and Morris, H.T., 1989a, Geologic map of the Milford quadrangle and east half of the Frisco quadrangle, Beaver County, Utah: U.S. Geological Survey Miscellaneous Investigation Series Map I-1904.
- Best, M.G., Toth, M.I., Kowallis, J.B., Willis, J.B., and Best, V.C., 1989b, Geologic map of the northern White Rock Mountains-Hamlin Valley area, Beaver County, Utah, and Lincoln County, Nevada: U.S. Geological Survey Miscellaneous Investigations Series Map I-1881.
- Best, M.G., Hintze, L.F., Deino, A.L., and Maughan, L.L., 1998, Geologic map of the Fairview Range and Grassy Mountain, Lincoln County, Nevada: Nevada Bureau of Mines and Geology Map 114.
- Biek, R.F., Anderson, J.J., Rowley, P.D., and Maldonado, F., 2011a, Interim geologic map of the west part of the Panguitch 3- x 60' quadrangle, Garfield, Iron, and Kane Counties, Utah—year 3 progress report: Utah Geological Survey Open-File Report 585.
- Biek, R.F., Rowley, P.D., Hacker, D.B., Hayden, J.M., Willis, G.C., Hintze, L.F., Anderson, R.E., and Brown, K.D., 2011b, Geologic map of the St. George and east part of the Clover Mountains 30' x 60' quadrangles, Washington and Iron Counties, Utah: Utah Geological Survey Map-242DM.
- Blank, H.R., Jr., 1959, Geology of the Bull valley district, Washington County, Utah [Ph.D. thesis]: Seattle, University of Washington, 177 p.

- Blank, H.R., Jr., 1993, Preliminary geologic map of the Enterprise quadrangle, Washington and Iron Counties, Utah: U.S. Geological Survey Open-File Report 93-203.
- Bushman, A.V., 1973, Pre-Needles Range silicic volcanism, Tunnel Spring Tuff (Oligocene), west-central Utah: Brigham Young University Geology Studies, v. 20, pt. 4, p. 159-190.
- Campbell, D.R., 1978, Stratigraphy of pre-Needles Range Formation ash-flow tuffs in the northern Needle Range and southern Wah Wah Mountains, Beaver County, Utah: Brigham Young University Geology Studies, v.25, p. 31-46.
- Caskey, C.F., and Shuey, R.T., 1975, Mid-Tertiary volcanic stratigraphy, Sevier-Cove Fort area, central Utah: Utah Geology, v. 2, no. 1, p. 17-25.
- Cook, E.F., 1957, Geology of the Pine Valley Mountains, Utah: Utah Geological and Mineralogical Survey Bulletin 58, 111 p.
- Cornell, D., Butler, T., Holm, D., Hacker, D., and Spell, T., 2001, Stratigraphy and Ar/Ar ages of volcanic rocks of the Pinto quadrangle, Colorado Plateau transition zone, SW Utah, *in* Erskine, M.C., Faults, J.E., Bartley, J.M., and Rowley, P.D., eds., The geologic transition, High Plateaus to Great Basin—A symposium and field guide, The Mackin Volume: Utah Geological Association Publication 30, p.420-421.
- Cunningham, C.G. and Steven, T.A., 1979, Geologic map of the Delano Peak NE quadrangle, west-central Utah: U.S. Geological Survey Miscellaneous Field Studies Map MF-1105.
- Dixon, G.L., Hedlund, D.C., and Ekren, E.B., 1972, Geologic map of the Pritchards Station quadrangle, Nye County, Nevada: U.S. Geological Survey Miscellaneous Investigation Series Map I-728.
- Dolgoft, A., 1963, Volcanic stratigraphy of the Pahrangat area, Lincoln County, southeastern Nevada: Geological Society of America Bulletin, v. 74, p. 875-900.
- du Bray, E.A. and Hurtubise, D.O., 1994, Geologic map of the Seaman Range, Lincoln and Nye Counties, Nevada: U.S. Geological Survey Miscellaneous Investigation Series Map I-2282.
- Ekren, E.B. and Page, W.R., 1995, Preliminary geologic map of the Coyote Spring quadrangle, Lincoln County, Nevada: U.S. Geological Survey Open-File Report 95-550.
- Ekren, E.B., Rogers, C.L., and Dixon, G.L., 1973, Geologic and Bouguer gravity map of the Reveille quadrangle, Nye County, Nevada: U.S. Geological Survey Miscellaneous Investigation Series Map I-806.
- Ekren, E.B., Orkild, P.P., and Sargent, K.A., 1977, Geologic map of Tertiary rocks, Lincoln County, Nevada: U.S. Geological Survey Miscellaneous Investigation Series Map I-1041.
- Gans, P.B., and Miller, E.L., 1983, Style of mid-Tertiary extension in east-central Nevada, *in* Gurgel, K.D., ed., Geological excursions in the overthrust belt and metamorphic core complexes of the intermountain region: Utah Geological and Mineral Survey Special Studies 59, p. 108-160.
- Gans, P.B., Mahood, G.A., and Schermer, E., 1989, Synextensional magmatism in the Basin and range province; A case study from the eastern Great Basin: Geological Society of America Special paper 233, 53 p.
- Grant, S.K., 1995, Geologic map of the New Harmony quadrangle, Washington County, Utah: Utah Geological Survey Miscellaneous Publications 95-2.
- Higgins, J.M., 2002, Interim geologic map of the Veyo quadrangle, Washington County, Utah: Utah Geological Survey Open-File Report 401.

- Hintze, L.F., 1974a, Preliminary geologic map of the Conger Mountain quadrangle, Millard County, Utah: U.S. Geological Survey Miscellaneous Field Studies Map MF-634.
- Hintze, L.F., 1974b, Preliminary geologic map of the Crystal Peak quadrangle, Millard County, Utah: U.S. Geological Survey Miscellaneous Field Studies Map MF-635.
- Hintze, L.F., 1974c, Preliminary geologic map of the Wah Wah Summit quadrangle, Millard County, Utah: U.S. Geological Survey Miscellaneous Field Studies Map MF-637.
- Hintze, L.F., 1974d, Preliminary geologic map of the Tunnel Spring quadrangle, Millard County, Utah: U.S. Geological Survey Miscellaneous Field Studies Map MF-1334.
- Hintze, L.F., 1974e, Preliminary geologic map of The Barn quadrangle, Millard County, Utah: U.S. Geological Survey Miscellaneous Field Studies Map MF-633.
- Hintze, L.F., 1980, Preliminary geologic map of the Fish Springs NW and SW quadrangles, Juab and Tooele Counties, Utah: U.S. Geological Survey Miscellaneous Field Studies Map MF-1148.
- Hintze, L.F., 1981, Preliminary geologic map of the Marjum Pass and Swasey Peak NW quadrangles, Millard County, Utah: U.S. Geological Survey Miscellaneous Field Studies Map MF-1332.
- Hintze, L.F., 1986, Geologic map of the Mormon Gap and Tweedy Wash quadrangles, Millard County, Utah and Lincoln and White Pine Counties, Nevada: U.S. Geological Survey Miscellaneous Field Studies Map MF-1872.
- Hintze, L.F., 1997, Interim geologic map of the Deadman Point quadrangle, Millard County, Utah: Utah Geological Survey Open-File Report 355.
- Hintze, L.F. and Axen, G.J., 1995, Geologic map of the Scarecrow Peak quadrangle, Washington County, Utah and Lincoln County, Nevada: U.S. Geological Survey Geologic Quadrangle Map GQ-1759.
- Hintze, L.F. and Axen, G.J., 2001, Geologic map of the Lime Mountain quadrangle, Lincoln County, Nevada: Nevada Bureau of Mines and Geology Map 129.
- Hintze, L.F. and Best, M.G., 1987, Geologic map of the Mountain Home Pass and Miller Wash quadrangles, Millard and Beaver Counties, Utah, and Lincoln County, Nevada: U.S. Geological Survey Miscellaneous Field Studies Map MF-1950.
- Hintze, L.F. and Davis, F.D., 1994, Geologic map of the Red Knolls quadrangle, Millard County, Utah: Utah Geological Survey Map 142.
- Hintze, L.F. and Davis, F.D., 2003, Geologic of Millard County, Utah: Utah Geological Survey Bulletin 133, 305 p.
- Hintze, L.F. and Hammond, B.J., 1994, Geologic map of the Shivwits quadrangle, Washington County, Utah: Utah Geological Survey Map 153.
- Hintze, L.F., and Kowallis, B.J., 2009, Geologic history of Utah: Brigham Young University Geology Studies Special Publication 9, 225 p.
- Hintze, L.F., Lemmon, D.M., and Morris, H.T., 1984, Geologic map of the Frisco Peak quadrangle, Millard and Beaver Counties, Utah: U.S. Geological Survey Miscellaneous Investigation Series Map I-1573.
- Hintze, L.F., Anderson, R.E., and Embree, G.F., 1994a, Geologic map of the Motoqua and Gunlock quadrangles, Washington County, Utah: U.S. Geological Survey Miscellaneous Investigation Series Map I-2427.

- Hintze, L.F., Grant, S.K., Weaver, C.L., and Best, M.G., 1994b, Geologic map of the Blue Mountain-Lund area, Beaver and Iron Counties, Utah: U.S. Geological Survey Miscellaneous Investigation Series Map I-2361.
- Hintze, L.F. and Davis, F.D., Rowley, P.D., Cunningham, C.G., Steven, T.A., and Willis, G.C., 2003, Geologic map of the Richfield 30' x 60' quadrangle, southeast Millard County and parts of Beaver, Piute, and Sevier Counties, Utah: Utah Geological Survey Map 195.
- Hogg, N.C., 1972, Shoshonitic lavas in west-central Utah: Brigham Young University Geology Studies, v. 19, part 2, p. 133-184.
- Hose, R.K., 1965a, Geologic map and sections of the Conger Range NE quadrangle and adjacent area, Confusion Range, Millard County, Utah: U.S. Geological Survey Miscellaneous Investigation Series Map I-436.
- Hose, R.K., 1965b, Geologic map and sections of the Conger Range SE quadrangle and adjacent area, Confusion Range, Millard County, Utah: U.S. Geological Survey Miscellaneous Investigation Series Map I-435.
- Hose, R.K., 1974, Geologic map of the Granite Mountain SW quadrangle, Juab and Millard Counties, Utah: U.S. Geological Survey Miscellaneous Investigation Series Map I-831.
- Hose, R.K., 1983, Geologic map of the Cockalorum Wash quadrangle, Eureka and Nye Counties, Nevada: U.S. Geological Survey Miscellaneous Investigation Series Map I-1410.
- Hose, R.K. and Repenning, C.A., 1963a, Geologic map and sections of the Cowboy Pass NW quadrangle, Millard County, Utah: U.S. Geological Survey Miscellaneous Investigation Series Map I-378.
- Hose, R.K. and Repenning, C.A., 1963b, Geologic map and sections of the Cowboy Pass SW quadrangle, Millard County, Utah: U.S. Geological Survey Miscellaneous Investigation Series Map I-390.
- Hose, R.K. and Ziony, J.I., 1963, Geologic map and sections of the Gandy NE quadrangle, Millard County, Utah: U.S. Geological Survey Miscellaneous Investigation Series Map I-376.
- Hose, R.K., Blake, M.C., Jr., and Smith, R.M., 1976, Geology and mineral resources of White Pine County, Nevada: Nevada Bureau of Mines and Geology Bulletin 85, 105 p.
- Hurlow, H.A. and Biek, R.F., 2003, Geologic map of the Pintura quadrangle, Washington County, Utah: Utah Geological Survey Map 196.
- Keith, J.D., Tingey, D.G., and Best, M.G., 1994, Geologic map of the Rice Mountain quadrangle, Nevada and Utah: Nevada Bureau of Mines and Geology Field Studies Map 7.
- Kowallis, B.J., and Best, M.G., 1990, Fission track ages from volcanic rocks in southwestern Utah and southeastern Nevada: *Isochron/West*, no. 55, p.24-27.
- Kurlich, R.A., III and Anderson, J.J., 1997, Geologic map of the Hatch quadrangle, Garfield County, Utah: Utah Geological Survey Miscellaneous Publications 97-5.
- Lindsey, D.A., 1979, Geologic map and cross-sections of Tertiary rocks in the Thomas Range and northern Drum Mountains, Juab County, Utah: U.S. Geological Survey Miscellaneous Investigation Series Map I-1176.
- Loucks, M.D., Tingey, D.G., Best, M.G., Christiansen, E.H., and Hintze, L.F., 1989, Geologic map of the Fortification Range, Lincoln and White Pine Counties, Nevada: U.S. Geological Survey Miscellaneous Investigation Series Map I-1866.
- Mackin, J.H. and Rowley, P.D., 1975, Geologic map of the Avon SE quadrangle, Iron County, Utah: U.S. Geological Survey Geologic Quadrangle Map GQ-1294.

- Mackin, J.H. and Rowley, P.D., 1976, Geologic map of the Three Peaks quadrangle, Iron County, Utah: U.S. Geological Survey Geologic Quadrangle Map GQ-1297.
- Mackin, J.H., Nelson, W.H., and Rowley, P.D., 1976, Geologic map of the Cedar City NW quadrangle, Iron County, Utah: U.S. Geological Survey Geologic Quadrangle Map GQ-1295.
- Martin, M.W. and Naumann, T.R., 1995, Geologic map of the Reveille quadrangle, Nevada: Nevada Bureau of Mines and Geology Map 104.
- Maughan, L.L., 1996, Petrology and eruptive history of the dacitic ash-flow tuffs of the Lund Formation, southeastern Nevada and southwestern Utah [M.S. thesis]: Provo, Utah, Brigham Young University, 125 p.
- Maughan, L.L., Christiansen, E.H., Best, M.G., Gromme, C.S., Deino, A.L., and Tingey, D.G., 2002, The Oligocene Lund tuff, Great Basin, USA: a very large volume monotonous intermediate: *Journal of Volcanology and Geothermal Research*, v. 113, p. 129-157.
- McKee, E.H., Best, M.G., Barr, D.L., and Tingey, D.G., 1993, Potassium-argon ages of mafic and intermediate-composition lava flows in the Great Basin of Nevada and Utah: *Isochron/West*, no. 6, p. 15-18
- Moore, D.W., Nealey, L.D., Rowley, P.D., Hatfield, S.C., Maxwell, D.J., and Mitchell, E., 2004, Geologic map of the Navajo Lake quadrangle, Kane and Iron Counties, Utah: Utah Geological Survey Map 199.
- Moores, E.M., Scott, R.B., Lumsden, W.W., 1968, Tertiary tectonics of the White Pine-Grant Range region, east-central Nevada: *Geological Society of America Bulletin*, v. 79, p. 1703-1726.
- Moring, B., 1987, Geologic map of the South Pahroc Range, Lincoln County, Nevada: U.S. Geological Survey Miscellaneous Field Studies Map MF-1917.
- Nealey, L.D., Rowley, P.D., Unruh, D.M., Budahn, J.R., Snee, L.W., Mehnert, H.H., and Anderson, R.E., 1995, Preliminary geochemistry of Miocene ash-flow tuffs in and near the Caliente caldera complex, southeastern Nevada and southwestern Utah, *in* Scott, R.B. and Swadley, W.C., eds., *Geologic studies in the Basin and Range-Colorado Plateau transition in southeastern Nevada, southwestern Utah, and northwestern Arizona*: U.S. Geological Survey Bulletin 2056, p. 91-110.
- Nelson, S.T., 1989, Geologic map of the Geyser Peak quadrangle, Wayne and Sevier Counties, Utah: Utah Geological Survey Map 114.
- Nielsen, P.J., 1992, Petrology of the Oligocene Shingle Pass Tuff in the northern Basin and Range, Nevada: Evolution of a dry, reduced magma system [M.S. thesis]: Provo, Utah, Brigham Young University, 38 p.
- Page, W.R., and Dixon, G.L., 1994, Modal analyses of selected Tertiary volcanic rocks from Nye and Lincoln Counties, Nevada: U.S. Geological Survey Open-File Report 94-151, 69 p.
- Page, W.R. and Ekren, E.B., 1995, Preliminary geologic map of the Bristol Well quadrangle, Lincoln County, Nevada: U.S. Geological Survey Open-File Report 95-580.
- Park, C.F., Jr., Gemmill, P., and Tschanz, C.M., 1958, Geologic map and sections of the Pioche Hills, Lincoln County, Nevada: U.S. Geological Survey Mineral Investigations Field Studies Map MF-136, scale 1:12,000.
- Quinlivan, W.D., Rogers, C.L., and Dodge, H.W., Jr., 1974, Geologic map of the Portuguese Mountain quadrangle, Nye County, Nevada: U.S. Geological Survey Miscellaneous Investigation Series Map I-804.

- Radke, L.E., 1992, Petrology and temporal evolution of the rhyolite ash-flow tuffs of the Stone Cabin Formation [M.S. thesis]: Provo, Utah, Brigham Young University, 102 p.
- Ross, K.T., Christiansen, E.H., Best, M.G., Dorais, M.J., and Tingey, D.G., 2002, Petrology and emplacement of the Cottonwood Wash Tuff [abstract]: Geological Society of America Abstracts with Programs, v. 34, no. 3, p. A-9.
- Rowley, P.D., 1975, Geologic map of the Enoch NE quadrangle, Iron County, Utah: U.S. Geological Survey Geologic Quadrangle Map GQ-1301.
- Rowley, P.D., 1976, Geologic map of the Enoch NW quadrangle, Iron County, Utah: U.S. Geological Survey Geologic Quadrangle Map GQ-1302.
- Rowley, P.D., 1978, Geologic map of the Thermo 15-minute quadrangle, Beaver and Iron Counties, Utah: U.S. Geological Survey Geologic Quadrangle Map GQ-1493.
- Rowley, P.D. and Shroba, R.R., 1991, Geologic map of the Indian Cove quadrangle, Lincoln County, Nevada: U.S. Geological Survey Geologic Quadrangle Map GQ-1701.
- Rowley, P.D. and Threet, R.L., 1976, Geologic map of the Enoch quadrangle, Iron County, Utah: U.S. Geological Survey Geologic Quadrangle Map GQ-1296.
- Rowley, P.D., Cunningham, C.G., Anderson, J.J., and Steven, T.A., 1979, Geologic map of the Marysville SW quadrangle, Piute County, Utah: U.S. Geological Survey Miscellaneous Field Studies Map MF-1116.
- Rowley, P.D., Hereford, R., and Williams, V.S., 1987, Geologic map of the Adams Head-Johns Valley area, southern Sevier Plateau, Garfield County, Utah: U.S. Geological Survey Miscellaneous Investigation Series Map I-1798.
- Rowley, P.D., Cunningham, C.G., Steven, T.A., Mehnert, H.H., Naeser, C.W., 1988a, Geologic map of the Antelope Range quadrangle, Piute County, Utah: Utah Geological and Mineral Survey, Map 106.
- Rowley, P.D., Cunningham, C.G., Steven, T.A., Mehnert, H.H., Naeser, C.W., 1988b, Geologic map of the Marysville quadrangle, Piute County, Utah: Utah Geological and Mineral Survey, Map 105.
- Rowley, P.D., Shroba, R.R., Simonds, F.W., Burke, K.J., Axen, G.J., and Olmore, S.D., 1994, Geologic map of the Chief Mountain quadrangle, Lincoln County, Nevada: U.S. Geological Survey Geologic Quadrangle Map GQ-1731.
- Rowley, P.D., Cunningham, C.G., Steven, T.A., Workman, J.B., Anderson, J.J., and Theissen, K.M., 2002, Geologic map of the central Marysville volcanic field, southwestern Utah: U.S. Geological Survey Geologic Investigations Series I-2645-A.
- Rowley, P.D., Williams, V.S., Vice, G.S., Maxwell, D.J., Hacker, D.B., Hayden, Snee, L.W., Mackin, J.H., 2006, Interim geologic map of the Cedar City 30' x 60' quadrangle, Iron and Washington Counties, Utah: Utah Geological Survey Open File Report OFR-476.
- Rowley, P.D., Anderson, R.E., Hacker, D.B., Boswell, J.T., Maxwell, D.J., Cox, D.P., Willden, R., Adair, D.H., 2007, Interim geologic map of the Goldstrike quadrangle and east part of the Docs Pass quadrangle, Washington County, Utah: Utah Geological Survey Open-File Report 510.
- Rowley, P.D., Hacker, D.B., Maxwell, D.J., and Boswell, J.T., 2008, Interim geologic map of the Utah part of the Deer Lodge Canyon, Prohibition Flat, Uvada, and Pine Park quadrangles (east part of the Caliente 30' x 60' quadrangle), Iron and Washington Counties, Utah: Utah Geological Survey Open-File Report 530.

- Scott, R.B., 1965, The Tertiary geology and ignimbrite petrology of the Grant Range, east central Nevada [Ph.D. thesis]: Houston, Texas, Rice University, 116 p.
- Scott, R.B., and Swadley, WC, 1995, Geologic studies in the Basin and Range-Colorado Plateau transition in southeastern Nevada, southwestern Utah, and northwestern Arizona, 1992:U.S. Geological Survey Bulletin 2056, p. 80.
- Scott, R.B., Swadley, WC, and Byron, B., 1992, Preliminary geologic map of the Pahroc Spring quadrangle, Lincoln County, Nevada: U.S. Geological Survey Open-File Report 92-423.
- Scott, R.B., Swadley, WC, and Novak, S.W., 1993, Geologic map of the Delamar Lake quadrangle, Lincoln County, Nevada: U.S. Geological Survey Geologic Quadrangle Map GQ-1730.
- Scott, R.B., Swadley, WC, and Taylor, W.J., 1994, Preliminary geologic map of the Wheatgrass Spring quadrangle, Lincoln County, Nevada: U.S. Geological Survey Open-File Report 94-175.
- Scott, R.B., Swadley, WC, Taylor, W.J., and Harding, A.E., 1995, Preliminary geologic map of the Deadman Spring quadrangle, Lincoln County, Nevada: U.S. Geological Survey Open-File Report 95-94.
- Shubat, M.A. and Siders, M.A., 1988, Geologic map of the Silver Peak quadrangle, Iron County, Utah: Utah Geological and Mineral Survey Map 108.
- Siders, M.A., 1985, Geologic map of the Pinon Point quadrangle, Iron County, Utah: Utah Geological and Mineral Survey Map 84.
- Siders, M.A., 1991, Geologic map of the Mount Escalante quadrangle, Iron County, Utah: Utah Geological and Mineral Survey Map 131.
- Siders, M.A., and Shubat, M. A., 1986, Stratigraphy and structure of the northern Bull Valley Mountains and Antelope Range, Iron County, Utah: Utah Geological Association Publication 15, p. 87-102.
- Siders, M.A., Rowley, P.D., Shubat, M.A., Christenson, G.E., Galyardt, G.L., 1990, Geologic map of the Newcastle quadrangle, Iron County, Utah: U.S. Geological Survey Geologic Quadrangle Map GQ-1690.
- Steven, T.A., 1979, Geologic map of the Monroe NW [Elsinore] quadrangle, west-central Utah: U.S. Geological Survey Miscellaneous Field Studies Map MF-1107.
- Steven, T.A., 1989, Geologic map of the Crystal Peak caldera, west-central Utah: U.S. Geological Survey Miscellaneous Investigations Series Map I-2002, scale 1:100,000.
- Steven, T.A. and Cunningham, C.G., 1979, Geologic map of the Sevier SE quadrangle, west-central Utah: U.S. Geological Survey Miscellaneous Field Studies Map MF-1109.
- Swadley, WC and Rowley, P.D., 1994, Geologic map of the Pahroc Spring SE quadrangle, Lincoln County, Nevada: U.S. Geological Survey Geologic Quadrangle Map GQ-1752.
- Swadley, WC and Scott, R.B., 1990, Preliminary geologic map of the Delamar NW quadrangle, Lincoln County, Nevada: U.S. Geological Survey Open-File Report 90-622.
- Swadley, WC, Page, W.R., and Scott, R.B., 1994a, Preliminary geologic map of the Deadman Spring NE quadrangle, Lincoln County, Nevada: U.S. Geological Survey Open-file Report 94-283.
- Swadley, WC, Page, W.R., Scott, R.B., and Pampeyan, E.H., 1994b, Preliminary geologic map of the Delamar 3 SE quadrangle, Lincoln County, Nevada: U.S. Geological Survey Geologic Quadrangle Map GQ-1754.

- Tilton, T.L., 2001, Geologic map of the Alton quadrangle, Kane County, Utah: Utah Geological Survey Miscellaneous Publications 01-4.
- Toth, M.I., 1986, Geologic map of the White Rock Peak quadrangle, Lincoln County, Nevada, and Beaver and Iron counties, Utah: U.S. Geological Survey Open-File Report OFR-86-563, scale 1:24,000, 1 sheet, 5 p. text.
- Wheeler, R.F., 1980, Geology of the Sewing Machine Pass quadrangle, central Wah Wah Range, Beaver County, Utah: Brigham Young University Geology Studies, v.27, Part 2, p.175-191.
- Whitebread, D.H., 1969, Geologic map of the Wheeler Peak and Garrison quadrangles, Nevada and Utah: U.S. Geological Survey Miscellaneous Investigations Series Map I-578.
- Williams, P.L., 1967; Stratigraphy and petrography of the Quichapa Group, southwestern Utah and southeastern Nevada [Ph.D. thesis]: Seattle, University of Washington, 140 p.
- Williams, V.S., Best, M.G., and Keith, J.D., 1997, Geologic map of the Ursine-Panaca Summit-Deer Lodge area, Lincoln County, Nevada and Iron County, Utah: U.S. Geological Survey Miscellaneous Investigations Series Map I-2479.
- Willis, G.C., 1986, Geologic map of the Salina quadrangle, Sevier County, Utah: Utah Geological and Mineral Survey Map 83.
- Willis, G.C., 1988, Geologic map of the Aurora quadrangle, Sevier County, Utah: Utah Geological and Mineral Survey Map 112.
- Willis, J.B., Best, M.G., Kowallis, J.B., and Best, V.C., 1987, Preliminary geologic map of the northern Wilson Creek Range, Lincoln County, Nevada: U.S. Geological Survey Miscellaneous Field Studies Map MF-1971.
